# Supplementary material for: ARDS and aging: TYMS emerges as a promising biomarker and therapeutic target
Source: Front Immunol. 2024 Mar 15;15:1365206. doi: 10.3389/fimmu.2024.1365206 (PMC10978671; doi:10.3389/fimmu.2024.1365206)
Supplement: Supplementary file 1 [file Table_1.xlsx]

## Sheet: Table S1
Table S1. Differentially expressed aging related genes.
ID	logFC	AveExpr	t	P.Value	adj.P.Val	B
ATF2	1.80829	8.6627	4.63927	2.04298e-05	0.0027376	2.66502
TYMS	2.55017	5.47121	4.10253	0.000129339	0.00866574	0.960438
CKAP2	2.60067	4.97913	3.81731	0.000330582	0.0105112	0.0993299
XPO1	1.41683	10.1465	3.69565	0.00048832	0.0105112	-0.257112
APOE	-2.84657	9.55344	-3.66459	0.000538907	0.0105112	-0.347011
KNDC1	-2.96116	4.86601	-3.61314	0.000633871	0.0105112	-0.494879
UBE2V1	1.45118	9.53876	3.59017	0.000681252	0.0105112	-0.560491
UBE2C	1.74841	6.57979	3.5823	0.000698267	0.0105112	-0.582934
SLC13A3	-2.16027	4.74847	-3.54681	0.000780042	0.0105112	-0.683632
HBP1	1.5761	10.4219	3.52325	0.000839303	0.0105112	-0.750157
MTHFD2	1.45888	8.7947	3.48721	0.000938303	0.0105112	-0.85137
SUMO1	1.49294	9.33332	3.48618	0.000941303	0.0105112	-0.854267
USP28	1.66779	6.57825	3.42854	0.00112357	0.0112283	-1.01471
LMNA	-2.65738	10.6152	-3.41441	0.00117311	0.0112283	-1.05377
PSMA2	2.07541	8.01955	3.3838	0.00128765	0.011503	-1.13807
GMNN	2.17015	5.96721	3.34993	0.00142665	0.0119482	-1.23072
CEACAM1	1.52925	9.83815	3.32946	0.00151745	0.011961	-1.28644
AXL	-1.55059	6.33848	-3.27169	0.001804	0.0134298	-1.44244
NBR1	1.25896	9.15703	3.21867	0.00211121	0.0148896	-1.58398
DUSP3	1.14088	9.05073	3.18154	0.00235493	0.0156221	-1.68215
MORC3	1.32936	9.46407	3.16828	0.00244824	0.0156221	-1.71703
TRDMT1	1.25174	7.78783	3.14088	0.0026521	0.0161537	-1.78877
PRKDC	-1.4555	8.94496	-3.0336	0.00361337	0.0210518	-2.06543
STAT1	1.79109	11.1434	3.01827	0.00377481	0.021076	-2.10443
KDM6B	-2.0589	12.6555	-2.96856	0.00434545	0.0215629	-2.22984
METTL14	1.45298	6.94032	2.96563	0.00438146	0.0215629	-2.23718
IGFBP2	-2.07207	7.21125	-2.9605	0.00444517	0.0215629	-2.25002
MED1	1.01846	7.61629	2.94926	0.00458787	0.0215629	-2.27812
TAGLN	-1.64709	7.14896	-2.94319	0.0046666	0.0215629	-2.29324
ATRX	1.31712	9.52056	2.90661	0.00516878	0.0223127	-2.384
P2RY14	2.83153	5.54274	2.90481	0.00519483	0.0223127	-2.38846
BLVRA	-1.2921	8.39332	-2.89567	0.00532841	0.0223127	-2.41097
GGCT	1.71422	5.2141	2.87405	0.00565751	0.0227961	-2.46408
MCM3AP	-1.0852	8.55442	-2.86604	0.00578409	0.0227961	-2.48368
PSMA5	1.44756	7.74886	2.81569	0.00664175	0.0240467	-2.60593
TLR8	2.73353	7.87165	2.81518	0.00665091	0.0240467	-2.60714
KDM1A	1.01349	6.51858	2.78861	0.00715005	0.0240467	-2.67099
KCNA1	-1.60792	2.51286	-2.78119	0.0072956	0.0240467	-2.68876
TBK1	1.38646	9.9046	2.77581	0.0074027	0.0240467	-2.7016
CDCA2	1.70458	3.17642	2.77142	0.00749126	0.0240467	-2.71208
HYOU1	-1.2089	8.79537	-2.75992	0.0077277	0.0240467	-2.73944
BUB1	1.93066	5.03581	2.74492	0.0080465	0.0240467	-2.77501
CHUK	1.59991	7.65506	2.7248	0.00849299	0.0240467	-2.82248
HSPA9	1.01544	9.52849	2.72285	0.00853749	0.0240467	-2.82707
TP73	-2.08097	4.80819	-2.71235	0.00878057	0.0240467	-2.85172
PEX5	-1.09936	7.00125	-2.71099	0.0088125	0.0240467	-2.85491
TGFBI	-1.93591	10.4404	-2.70563	0.00893933	0.0240467	-2.86745
AURKB	1.95695	5.17969	2.69778	0.00912828	0.0240467	-2.8858
TOPBP1	1.4155	7.35303	2.69488	0.00919898	0.0240467	-2.89256
TBP	1.35745	5.91451	2.68977	0.009325	0.0240467	-2.90449
VCP	-1.15564	10.7013	-2.68833	0.00936064	0.0240467	-2.90784
PSEN1	1.19029	11.0944	2.68182	0.00952394	0.0240467	-2.923
MYBBP1A	-1.23052	7.01526	-2.67557	0.00968296	0.0240467	-2.9375
IL6	2.3388	8.13348	2.67457	0.00970849	0.0240467	-2.93981
IGFBP5	-2.09889	5.00286	-2.66577	0.00993733	0.0240467	-2.96021
KIF11	1.08995	4.61872	2.66152	0.0100494	0.0240467	-2.97002
GNMT	1.44416	3.76731	2.6419	0.0105827	0.0248786	-3.01524
YEATS4	1.49948	5.08837	2.60877	0.0115417	0.0257423	-3.09098
ITGB4	-1.72201	7.38022	-2.60652	0.0116096	0.0257423	-3.0961
CDK18	-1.23352	6.4504	-2.60476	0.0116631	0.0257423	-3.10011
TGFB2	1.3907	3.48621	2.60294	0.0117185	0.0257423	-3.10424
TPX2	1.48081	3.80802	2.58061	0.0124185	0.0263952	-3.15479
HK3	-1.35372	10.3881	-2.57549	0.0125842	0.0263952	-3.16632
STK32C	-1.47547	5.67579	-2.5748	0.0126067	0.0263952	-3.16787
RPTOR	-1.11054	7.33885	-2.56553	0.0129124	0.0265765	-3.18872
CCN2	-2.60624	6.68484	-2.56024	0.0130899	0.0265765	-3.20059
NBN	1.78365	11.1731	2.55271	0.0133464	0.0266927	-3.21745
INSR	-1.05513	6.5949	-2.53223	0.0140668	0.0276187	-3.2631
PIR	1.32158	7.11975	2.52796	0.0142216	0.0276187	-3.2726
CNOT6L	1.06885	7.79998	2.48822	0.0157361	0.0301235	-3.36025
RBP2	2.4127	4.09756	2.47056	0.0164545	0.030809	-3.39883
TBPL1	2.13578	7.68291	2.46817	0.0165541	0.030809	-3.40404
STK11	-1.00336	7.37059	-2.45452	0.0171327	0.031449	-3.43369
XIAP	1.01972	9.16815	2.44633	0.0174887	0.0316687	-3.45143
NLRX1	-1.32793	5.41808	-2.43053	0.0181942	0.0325069	-3.48551
NUTF2	1.14145	7.73296	2.41899	0.0187251	0.0325434	-3.51026
RBL1	1.33647	5.79045	2.41776	0.0187827	0.0325434	-3.5129
ZNF207	1.30117	10.8265	2.41434	0.0189431	0.0325434	-3.52022
HMGCR	1.02208	9.67427	2.39793	0.0197308	0.0328166	-3.55523
PRMT6	-1.3853	4.02771	-2.39487	0.0198807	0.0328166	-3.56173
DHX9	1.02249	9.35418	2.38232	0.0205072	0.0328166	-3.58836
FASTK	-1.22189	7.15945	-2.38087	0.0205806	0.0328166	-3.59143
PRKN	-1.30099	4.76801	-2.37855	0.0206986	0.0328166	-3.59633
CREB1	1.09044	10.0492	2.37193	0.0210389	0.0328166	-3.61031
CD40LG	1.53551	3.32093	2.36935	0.0211724	0.0328166	-3.61573
FXR1	1.59638	9.30326	2.3679	0.0212482	0.0328166	-3.61879
TGFBR1	1.4591	9.74225	2.36679	0.0213063	0.0328166	-3.62113
SLC16A7	1.14486	8.05492	2.36187	0.0215654	0.0328382	-3.63148
MOB3A	-1.25807	11.2231	-2.34955	0.0222259	0.0334637	-3.6573
MEIS2	-1.55064	5.71011	-2.34076	0.0227087	0.0338107	-3.67568
IFI16	1.20981	10.882	2.33525	0.0230155	0.0338909	-3.68715
POLG	-1.28952	9.51203	-2.32652	0.0235101	0.0340465	-3.7053
MAGOHB	1.75018	5.65975	2.32443	0.0236293	0.0340465	-3.70962
ASAH1	1.27651	12.8592	2.29228	0.0255409	0.0359999	-3.77594
CDK1	1.73899	4.3463	2.29011	0.0256748	0.0359999	-3.78038
FAS	1.45936	9.27433	2.28359	0.0260805	0.0359999	-3.79372
ATG5	1.62307	7.2058	2.28148	0.0262131	0.0359999	-3.79803
CSNK1E	-1.08724	8.39687	-2.27965	0.0263282	0.0359999	-3.80176
AKT1	-1.0703	9.06848	-2.26015	0.0275865	0.0373393	-3.84142
ANLN	1.55024	5.51567	2.25332	0.0280397	0.0375731	-3.85524
NRAS	1.59487	7.62344	2.23005	0.0296335	0.0393157	-3.90208
TOP2A	1.57432	4.60775	2.21324	0.0308339	0.0404047	-3.93565
PCNA	1.3661	6.5724	2.20079	0.0317504	0.0404047	-3.96039
EPAS1	-1.2158	8.73907	-2.19516	0.0321729	0.0404047	-3.97154
TRPM7	1.01241	9.58314	2.19432	0.032236	0.0404047	-3.97319
TLR10	1.35243	7.19917	2.19187	0.0324218	0.0404047	-3.97804
HMGB2	1.38063	9.5292	2.19109	0.0324808	0.0404047	-3.97957
NDST2	-1.05488	9.10526	-2.18781	0.0327313	0.0404047	-3.98605
PDCD10	1.26365	9.30554	2.17239	0.0339313	0.0404047	-4.01637
IL1A	2.75047	7.51414	2.169	0.0341999	0.0404047	-4.023
GEMIN2	-1.10813	8.50408	-2.16843	0.0342451	0.0404047	-4.02411
PAK4	-1.24102	7.68949	-2.16722	0.0343419	0.0404047	-4.02649
AKAP4	-1.45163	1.11533	-2.1654	0.0344877	0.0404047	-4.03005
RRAD	-1.66159	6.66088	-2.16364	0.0346291	0.0404047	-4.03349
EIF2AK2	1.22918	8.71372	2.16171	0.0347845	0.0404047	-4.03725
SENP1	1.54123	7.80492	2.15933	0.0349772	0.0404047	-4.0419
LAMP2	1.27982	10.4174	2.15514	0.0353189	0.0404507	-4.05006
DHCR24	-1.71401	7.58104	-2.15093	0.0356648	0.0405007	-4.05825
UCP3	-1.42731	4.55541	-2.12147	0.0381713	0.0429828	-4.11518
MAD1L1	-1.15092	8.40314	-2.10883	0.039293	0.0437625	-4.13941
A2M	-1.30417	8.06028	-2.10143	0.0399627	0.0437625	-4.15353
KIFC1	1.27464	4.89256	2.10136	0.0399693	0.0437625	-4.15367
TERT	1.11137	2.12205	2.09917	0.0401701	0.0437625	-4.15785
TTK	1.96999	4.13572	2.07443	0.0424926	0.0457964	-4.20472
RAD51	-1.12991	5.04258	-2.07122	0.0428022	0.0457964	-4.21076
EFEMP1	-1.8868	4.63039	-2.06527	0.0433813	0.0457964	-4.22194
PTEN	1.35007	11.616	2.06256	0.0436478	0.0457964	-4.22703
SUV39H1	-1.41132	3.85492	-2.06156	0.0437458	0.0457964	-4.2289
LIN54	1.00481	7.44103	2.04713	0.0451896	0.0468993	-4.25587
RBX1	1.17729	7.72163	2.04168	0.0457456	0.0468993	-4.26602
NOTCH3	-1.04757	6.80183	-2.04067	0.0458493	0.0468993	-4.2679
PLCG2	-1.08162	13.5168	-2.02647	0.0473286	0.0480457	-4.29421
CTSB	-1.17421	13.7401	-2.01757	0.0482761	0.0482826	-4.31062
NUAK1	-1.32876	3.01484	-2.01751	0.0482826	0.0482826	-4.31073

## Sheet: Table S2
Table S2. Results of PPI protein network interaction analysis
#node1	node2	node1_string_id	node2_string_id	neighborhood_on_chromosome	gene_fusion	phylogenetic_cooccurrence	homology	coexpression	experimentally_determined_interaction	database_annotated	automated_textmining	combined_score
A2M	APOE	9606.ENSP00000323929	9606.ENSP00000252486	0	0	0	0	0.27	0.292	0	0.957	0.975
A2M	IL1A	9606.ENSP00000323929	9606.ENSP00000263339	0	0	0	0	0.059	0	0	0.565	0.573
A2M	PSEN1	9606.ENSP00000323929	9606.ENSP00000326366	0	0	0	0	0	0	0	0.553	0.553
A2M	TGFB2	9606.ENSP00000323929	9606.ENSP00000355896	0	0	0	0	0.076	0.045	0	0.605	0.621
A2M	CTSB	9606.ENSP00000323929	9606.ENSP00000345672	0	0	0	0	0.084	0	0	0.758	0.768
A2M	IL6	9606.ENSP00000323929	9606.ENSP00000385675	0	0	0	0	0	0	0	0.95	0.95
AKT1	ITGB4	9606.ENSP00000451828	9606.ENSP00000200181	0	0	0	0	0.044	0.052	0	0.447	0.456
AKT1	TBP	9606.ENSP00000451828	9606.ENSP00000230354	0	0	0	0	0.049	0	0	0.636	0.639
AKT1	IGFBP2	9606.ENSP00000451828	9606.ENSP00000233809	0	0	0	0	0.049	0	0	0.479	0.483
AKT1	IGFBP5	9606.ENSP00000451828	9606.ENSP00000233813	0	0	0	0	0.042	0	0	0.445	0.445
AKT1	APOE	9606.ENSP00000451828	9606.ENSP00000252486	0	0	0	0	0	0.166	0	0.652	0.697
AKT1	KDM6B	9606.ENSP00000451828	9606.ENSP00000254846	0	0	0	0	0.066	0.106	0	0.361	0.42
AKT1	TOPBP1	9606.ENSP00000451828	9606.ENSP00000260810	0	0	0	0	0.049	0.292	0	0.241	0.444
AKT1	IL1A	9606.ENSP00000451828	9606.ENSP00000263339	0	0	0	0	0	0	0	0.666	0.666
AKT1	NOTCH3	9606.ENSP00000451828	9606.ENSP00000263388	0	0	0	0	0.089	0.098	0	0.518	0.57
AKT1	EPAS1	9606.ENSP00000451828	9606.ENSP00000263734	0	0	0	0	0.061	0.114	0	0.647	0.681
AKT1	ATF2	9606.ENSP00000451828	9606.ENSP00000264110	0	0	0	0	0.06	0.096	0.65	0.404	0.799
AKT1	HMGCR	9606.ENSP00000451828	9606.ENSP00000287936	0	0	0	0	0.043	0.049	0	0.639	0.643
AKT1	HSPA9	9606.ENSP00000451828	9606.ENSP00000297185	0	0	0	0	0.047	0.394	0	0.54	0.711
AKT1	AXL	9606.ENSP00000451828	9606.ENSP00000301178	0	0	0	0.568	0	0	0	0.576	0.576
AKT1	INSR	9606.ENSP00000451828	9606.ENSP00000303830	0	0	0	0.564	0.055	0.095	0	0.418	0.459
AKT1	RPTOR	9606.ENSP00000451828	9606.ENSP00000307272	0	0	0	0	0.085	0.3	0.9	0.954	0.996
AKT1	TERT	9606.ENSP00000451828	9606.ENSP00000309572	0	0	0	0	0.05	0.612	0	0.758	0.903
AKT1	PRKDC	9606.ENSP00000451828	9606.ENSP00000313420	0	0	0	0	0.068	0.633	0	0.703	0.889
AKT1	TYMS	9606.ENSP00000451828	9606.ENSP00000315644	0	0	0	0	0.042	0	0	0.434	0.435
AKT1	STK11	9606.ENSP00000451828	9606.ENSP00000324856	0	0	0.103	0.628	0.213	0.26	0	0.575	0.748
AKT1	PSEN1	9606.ENSP00000451828	9606.ENSP00000326366	0	0	0	0	0.06	0.049	0	0.508	0.521
AKT1	TBK1	9606.ENSP00000451828	9606.ENSP00000329967	0	0	0	0.573	0.074	0.624	0	0.666	0.873
AKT1	CTSB	9606.ENSP00000451828	9606.ENSP00000345672	0	0	0	0	0.056	0	0	0.491	0.5
AKT1	UBE2C	9606.ENSP00000451828	9606.ENSP00000348838	0	0	0	0	0.101	0.088	0	0.327	0.401
AKT1	VCP	9606.ENSP00000451828	9606.ENSP00000351777	0	0	0	0	0.06	0.614	0	0.328	0.735
AKT1	STAT1	9606.ENSP00000451828	9606.ENSP00000354394	0	0	0	0	0.106	0.096	0.4	0.93	0.961
AKT1	PRKN	9606.ENSP00000451828	9606.ENSP00000355865	0	0	0	0	0	0.106	0	0.493	0.528
AKT1	TGFB2	9606.ENSP00000451828	9606.ENSP00000355896	0	0	0	0	0.051	0.126	0	0.662	0.695
AKT1	CCN2	9606.ENSP00000451828	9606.ENSP00000356954	0	0	0	0	0	0	0	0.802	0.802
AKT1	LMNA	9606.ENSP00000451828	9606.ENSP00000357283	0	0	0	0	0.067	0.229	0	0.525	0.628
AKT1	ATG5	9606.ENSP00000451828	9606.ENSP00000358072	0	0	0	0	0.057	0.071	0	0.76	0.772
AKT1	NRAS	9606.ENSP00000451828	9606.ENSP00000358548	0	0	0	0	0.099	0.164	0	0.774	0.815
AKT1	CHUK	9606.ENSP00000451828	9606.ENSP00000359424	0	0	0	0.594	0.11	0.835	0.9	0.814	0.996
AKT1	CD40LG	9606.ENSP00000451828	9606.ENSP00000359663	0	0	0	0	0.087	0	0	0.48	0.504
AKT1	XIAP	9606.ENSP00000451828	9606.ENSP00000360242	0	0	0	0	0.049	0.786	0	0.725	0.939
AKT1	PTEN	9606.ENSP00000451828	9606.ENSP00000361021	0	0	0	0	0	0.648	0	0.967	0.988
AKT1	ATRX	9606.ENSP00000451828	9606.ENSP00000362441	0	0	0	0	0.049	0.305	0	0.411	0.577
AKT1	TRDMT1	9606.ENSP00000451828	9606.ENSP00000367030	0	0	0	0	0	0	0	0.473	0.473
AKT1	PIR	9606.ENSP00000451828	9606.ENSP00000369786	0	0	0	0	0.042	0.07	0	0.494	0.51
AKT1	METTL14	9606.ENSP00000451828	9606.ENSP00000373474	0	0	0	0	0.049	0	0	0.401	0.406
AKT1	SUMO1	9606.ENSP00000451828	9606.ENSP00000376077	0	0	0	0	0.047	0.088	0	0.597	0.619
AKT1	TAGLN	9606.ENSP00000451828	9606.ENSP00000376678	0	0	0	0	0.059	0.114	0	0.412	0.467
AKT1	CDK1	9606.ENSP00000451828	9606.ENSP00000378699	0	0	0	0.635	0.042	0.098	0	0.534	0.562
AKT1	CSNK1E	9606.ENSP00000451828	9606.ENSP00000380044	0	0	0	0.567	0.049	0.066	0	0.444	0.463
AKT1	KDM1A	9606.ENSP00000451828	9606.ENSP00000383042	0	0	0	0	0.074	0.047	0	0.446	0.468
AKT1	XPO1	9606.ENSP00000451828	9606.ENSP00000384863	0	0	0	0	0.054	0.052	0	0.67	0.679
AKT1	IL6	9606.ENSP00000451828	9606.ENSP00000385675	0	0	0	0	0	0	0	0.872	0.872
AKT1	BLVRA	9606.ENSP00000451828	9606.ENSP00000385757	0	0	0	0	0.049	0.325	0	0.348	0.545
AKT1	CREB1	9606.ENSP00000451828	9606.ENSP00000387699	0	0	0	0	0.092	0.292	0.75	0.809	0.965
AKT1	LAMP2	9606.ENSP00000451828	9606.ENSP00000408411	0	0	0	0	0.092	0	0	0.455	0.485
AKT1	TOP2A	9606.ENSP00000451828	9606.ENSP00000411532	0	0	0	0	0.062	0	0	0.585	0.595
AKT1	RAD51	9606.ENSP00000451828	9606.ENSP00000493712	0	0	0	0	0	0.045	0	0.446	0.448
AKT1	FAS	9606.ENSP00000451828	9606.ENSP00000498466	0	0	0	0	0	0.058	0	0.524	0.532
AKT1	HYOU1	9606.ENSP00000451828	9606.ENSP00000480150	0	0	0	0	0.061	0.094	0	0.504	0.541
AKT1	PAK4	9606.ENSP00000451828	9606.ENSP00000469413	0	0	0	0.635	0.075	0.071	0	0.555	0.585
AKT1	PLCG2	9606.ENSP00000451828	9606.ENSP00000482457	0	0	0	0	0.047	0	0	0.77	0.771
ANLN	GMNN	9606.ENSP00000265748	9606.ENSP00000230056	0	0	0	0	0.271	0	0	0.275	0.45
ANLN	KIF11	9606.ENSP00000265748	9606.ENSP00000260731	0	0	0	0	0.879	0	0	0.582	0.947
ANLN	PRKDC	9606.ENSP00000265748	9606.ENSP00000313420	0	0	0	0	0.149	0.292	0	0.125	0.426
ANLN	LMNA	9606.ENSP00000265748	9606.ENSP00000357283	0	0	0	0	0.072	0.359	0	0.134	0.44
ANLN	CKAP2	9606.ENSP00000265748	9606.ENSP00000367276	0	0	0	0	0.427	0	0	0.312	0.589
ANLN	KIFC1	9606.ENSP00000265748	9606.ENSP00000393963	0	0	0	0	0.532	0	0	0.326	0.671
ANLN	CDCA2	9606.ENSP00000265748	9606.ENSP00000328228	0	0	0	0	0.465	0	0	0.418	0.675
ANLN	TTK	9606.ENSP00000265748	9606.ENSP00000358813	0	0	0	0	0.546	0	0	0.374	0.704
ANLN	TYMS	9606.ENSP00000265748	9606.ENSP00000315644	0	0	0	0	0.462	0	0	0.517	0.729
ANLN	UBE2C	9606.ENSP00000265748	9606.ENSP00000348838	0	0	0	0	0.476	0	0	0.584	0.773
ANLN	CDK1	9606.ENSP00000265748	9606.ENSP00000378699	0	0	0	0	0.643	0	0	0.506	0.816
ANLN	AURKB	9606.ENSP00000265748	9606.ENSP00000313950	0	0	0	0	0.45	0.292	0	0.636	0.846
ANLN	TOP2A	9606.ENSP00000265748	9606.ENSP00000411532	0	0	0	0	0.613	0.292	0	0.533	0.861
ANLN	BUB1	9606.ENSP00000265748	9606.ENSP00000302530	0	0	0	0	0.791	0	0	0.619	0.917
ANLN	TPX2	9606.ENSP00000265748	9606.ENSP00000300403	0	0	0	0	0.774	0	0	0.673	0.923
APOE	TBP	9606.ENSP00000252486	9606.ENSP00000230354	0	0	0	0	0.061	0	0	0.46	0.471
APOE	CD40LG	9606.ENSP00000252486	9606.ENSP00000359663	0	0	0	0	0	0	0	0.4	0.4
APOE	NOTCH3	9606.ENSP00000252486	9606.ENSP00000263388	0	0	0	0	0.097	0.062	0	0.352	0.403
APOE	DHCR24	9606.ENSP00000252486	9606.ENSP00000360316	0	0	0	0	0.049	0	0	0.408	0.413
APOE	AXL	9606.ENSP00000252486	9606.ENSP00000301178	0	0	0	0	0.056	0	0	0.446	0.456
APOE	ASAH1	9606.ENSP00000252486	9606.ENSP00000371152	0	0	0	0	0.061	0	0	0.461	0.472
APOE	CREB1	9606.ENSP00000252486	9606.ENSP00000387699	0	0	0	0	0	0	0	0.474	0.474
APOE	PTEN	9606.ENSP00000252486	9606.ENSP00000361021	0	0	0	0	0	0	0	0.528	0.528
APOE	TAGLN	9606.ENSP00000252486	9606.ENSP00000376678	0	0	0	0	0.08	0	0	0.512	0.532
APOE	LMNA	9606.ENSP00000252486	9606.ENSP00000357283	0	0	0	0	0.103	0	0	0.546	0.575
APOE	IL1A	9606.ENSP00000252486	9606.ENSP00000263339	0	0	0	0	0.067	0	0	0.591	0.602
APOE	PRKN	9606.ENSP00000252486	9606.ENSP00000355865	0	0	0	0	0	0	0	0.617	0.617
APOE	VCP	9606.ENSP00000252486	9606.ENSP00000351777	0	0	0	0	0	0.162	0	0.568	0.622
APOE	TGFBI	9606.ENSP00000252486	9606.ENSP00000416330	0	0	0	0	0.101	0	0.5	0.246	0.631
APOE	CTSB	9606.ENSP00000252486	9606.ENSP00000345672	0	0	0	0	0.148	0.063	0	0.654	0.699
APOE	STAT1	9606.ENSP00000252486	9606.ENSP00000354394	0	0	0	0	0.045	0	0	0.732	0.733
APOE	HMGCR	9606.ENSP00000252486	9606.ENSP00000287936	0	0	0	0	0	0	0	0.806	0.806
APOE	IL6	9606.ENSP00000252486	9606.ENSP00000385675	0	0	0	0	0	0	0	0.835	0.835
APOE	PSEN1	9606.ENSP00000252486	9606.ENSP00000326366	0	0	0	0	0	0	0	0.956	0.956
ASAH1	CTSB	9606.ENSP00000371152	9606.ENSP00000345672	0	0	0	0	0.116	0	0	0.413	0.46
ATF2	YEATS4	9606.ENSP00000264110	9606.ENSP00000247843	0	0	0	0	0.049	0.064	0.72	0	0.728
ATF2	TBK1	9606.ENSP00000264110	9606.ENSP00000329967	0	0	0	0	0.151	0.096	0	0.326	0.437
ATF2	SUMO1	9606.ENSP00000264110	9606.ENSP00000376077	0	0	0	0	0.113	0.39	0	0.06	0.448
ATF2	KDM1A	9606.ENSP00000264110	9606.ENSP00000383042	0	0	0	0	0.06	0	0.5	0.11	0.545
ATF2	CREB1	9606.ENSP00000264110	9606.ENSP00000387699	0	0	0	0	0.171	0.302	0.9	0.794	0.986
ATG5	EIF2AK2	9606.ENSP00000358072	9606.ENSP00000233057	0	0	0	0	0.042	0	0	0.648	0.649
ATG5	RPTOR	9606.ENSP00000358072	9606.ENSP00000307272	0	0	0	0	0.054	0	0	0.664	0.668
ATG5	TLR8	9606.ENSP00000358072	9606.ENSP00000312082	0	0	0	0	0.062	0	0	0.495	0.506
ATG5	STK11	9606.ENSP00000358072	9606.ENSP00000324856	0	0	0	0	0	0	0	0.507	0.507
ATG5	PSEN1	9606.ENSP00000358072	9606.ENSP00000326366	0	0	0	0	0.05	0	0	0.434	0.439
ATG5	TBK1	9606.ENSP00000358072	9606.ENSP00000329967	0	0	0	0	0.184	0.071	0	0.536	0.617
ATG5	NBR1	9606.ENSP00000358072	9606.ENSP00000343479	0	0	0	0	0	0	0	0.809	0.809
ATG5	CTSB	9606.ENSP00000358072	9606.ENSP00000345672	0	0	0	0	0.042	0	0	0.601	0.601
ATG5	VCP	9606.ENSP00000358072	9606.ENSP00000351777	0	0	0	0	0.094	0.33	0	0.352	0.572
ATG5	STAT1	9606.ENSP00000358072	9606.ENSP00000354394	0	0	0	0	0.09	0.181	0	0.443	0.549
ATG5	PRKN	9606.ENSP00000358072	9606.ENSP00000355865	0	0	0	0	0	0	0	0.717	0.717
ATG5	CHUK	9606.ENSP00000358072	9606.ENSP00000359424	0	0	0	0	0.186	0.071	0	0.376	0.487
ATG5	IL6	9606.ENSP00000358072	9606.ENSP00000385675	0	0	0	0	0	0	0	0.531	0.531
ATG5	CREB1	9606.ENSP00000358072	9606.ENSP00000387699	0	0	0	0	0.105	0	0	0.528	0.56
ATG5	PTEN	9606.ENSP00000358072	9606.ENSP00000361021	0	0	0	0	0.071	0	0	0.568	0.582
ATG5	FAS	9606.ENSP00000358072	9606.ENSP00000498466	0	0	0	0	0.075	0.51	0	0.321	0.665
ATG5	LAMP2	9606.ENSP00000358072	9606.ENSP00000408411	0	0	0	0	0.049	0	0	0.746	0.748
ATG5	NLRX1	9606.ENSP00000358072	9606.ENSP00000387334	0	0	0	0	0.055	0	0	0.903	0.905
ATRX	TOPBP1	9606.ENSP00000362441	9606.ENSP00000260810	0	0	0	0	0.07	0.249	0	0.408	0.551
ATRX	NBN	9606.ENSP00000362441	9606.ENSP00000265433	0	0	0	0	0.074	0.719	0	0.28	0.796
ATRX	TERT	9606.ENSP00000362441	9606.ENSP00000309572	0	0	0	0	0	0.067	0	0.789	0.794
ATRX	PRKDC	9606.ENSP00000362441	9606.ENSP00000313420	0	0	0	0	0.139	0.294	0	0.552	0.704
ATRX	SUV39H1	9606.ENSP00000362441	9606.ENSP00000337976	0	0	0	0	0.075	0.112	0	0.695	0.728
ATRX	NRAS	9606.ENSP00000362441	9606.ENSP00000358548	0	0	0	0	0.074	0.048	0	0.479	0.502
ATRX	TTK	9606.ENSP00000362441	9606.ENSP00000358813	0	0	0	0	0.077	0.067	0	0.37	0.41
ATRX	PTEN	9606.ENSP00000362441	9606.ENSP00000361021	0	0	0	0	0.049	0.076	0	0.769	0.779
ATRX	TOP2A	9606.ENSP00000362441	9606.ENSP00000411532	0	0	0	0	0.118	0.108	0	0.395	0.483
ATRX	TRDMT1	9606.ENSP00000362441	9606.ENSP00000367030	0.057	0	0	0	0.049	0	0	0.542	0.553
ATRX	PCNA	9606.ENSP00000362441	9606.ENSP00000368458	0.053	0	0	0	0.067	0.509	0	0.116	0.565
ATRX	CDK1	9606.ENSP00000362441	9606.ENSP00000378699	0	0	0	0	0.063	0.107	0	0.607	0.643
ATRX	SUMO1	9606.ENSP00000362441	9606.ENSP00000376077	0	0	0	0	0.067	0.152	0	0.585	0.643
ATRX	RAD51	9606.ENSP00000362441	9606.ENSP00000493712	0.042	0	0	0	0	0.886	0	0.998	0.999
AURKB	GMNN	9606.ENSP00000313950	9606.ENSP00000230056	0	0	0	0	0.269	0	0	0.289	0.458
AURKB	KIF11	9606.ENSP00000313950	9606.ENSP00000260731	0	0	0	0	0.768	0.272	0	0.804	0.964
AURKB	TPX2	9606.ENSP00000313950	9606.ENSP00000300403	0	0	0	0	0.687	0.297	0	0.75	0.94
AURKB	BUB1	9606.ENSP00000313950	9606.ENSP00000302530	0	0	0	0	0.827	0.089	0	0.984	0.997
AURKB	PRKDC	9606.ENSP00000313950	9606.ENSP00000313420	0	0	0	0	0.092	0.365	0	0.285	0.552
AURKB	CDK18	9606.ENSP00000313950	9606.ENSP00000423665	0	0	0.116	0.681	0.244	0.095	0	0.137	0.408
AURKB	SUMO1	9606.ENSP00000313950	9606.ENSP00000376077	0	0	0	0	0.123	0.091	0	0.341	0.429
AURKB	MAD1L1	9606.ENSP00000313950	9606.ENSP00000385334	0	0	0	0	0.056	0.179	0	0.326	0.432
AURKB	PTEN	9606.ENSP00000313950	9606.ENSP00000361021	0	0	0	0	0.074	0.099	0	0.383	0.44
AURKB	LMNA	9606.ENSP00000313950	9606.ENSP00000357283	0	0	0	0	0.087	0.292	0	0.238	0.465
AURKB	PCNA	9606.ENSP00000313950	9606.ENSP00000368458	0	0	0	0	0.402	0	0	0.146	0.467
AURKB	CKAP2	9606.ENSP00000313950	9606.ENSP00000367276	0	0	0	0	0.312	0	0	0.28	0.484
AURKB	MYBBP1A	9606.ENSP00000313950	9606.ENSP00000370968	0	0	0	0	0.137	0.329	0	0.425	0.638
AURKB	XIAP	9606.ENSP00000313950	9606.ENSP00000360242	0	0	0	0	0.153	0.41	0	0.387	0.667
AURKB	TYMS	9606.ENSP00000313950	9606.ENSP00000315644	0	0	0	0	0.623	0	0	0.333	0.738
AURKB	SUV39H1	9606.ENSP00000313950	9606.ENSP00000337976	0	0	0	0	0.136	0.102	0	0.693	0.741
AURKB	CDCA2	9606.ENSP00000313950	9606.ENSP00000328228	0	0	0	0	0.456	0	0	0.571	0.756
AURKB	TTK	9606.ENSP00000313950	9606.ENSP00000358813	0	0	0	0.641	0.614	0.261	0	0.303	0.784
AURKB	RAD51	9606.ENSP00000313950	9606.ENSP00000493712	0	0	0	0	0.463	0.071	0	0.604	0.785
AURKB	VCP	9606.ENSP00000313950	9606.ENSP00000351777	0	0	0	0	0.063	0.314	0	0.709	0.797
AURKB	KIFC1	9606.ENSP00000313950	9606.ENSP00000393963	0	0	0	0	0.803	0	0	0.544	0.906
AURKB	UBE2C	9606.ENSP00000313950	9606.ENSP00000348838	0	0	0	0	0.766	0.053	0.4	0.704	0.955
AURKB	TOP2A	9606.ENSP00000313950	9606.ENSP00000411532	0	0	0	0	0.831	0.314	0	0.761	0.97
AURKB	CDK1	9606.ENSP00000313950	9606.ENSP00000378699	0	0	0.138	0.719	0.95	0.331	0.4	0.856	0.997
AXL	PTEN	9606.ENSP00000301178	9606.ENSP00000361021	0	0	0	0	0	0.092	0	0.485	0.512
AXL	CCN2	9606.ENSP00000301178	9606.ENSP00000356954	0	0	0	0	0.203	0	0	0.449	0.542
AXL	NRAS	9606.ENSP00000301178	9606.ENSP00000358548	0	0	0	0	0.081	0.11	0	0.486	0.543
AXL	IL6	9606.ENSP00000301178	9606.ENSP00000385675	0	0	0	0	0.096	0	0	0.542	0.568
AXL	TGFBI	9606.ENSP00000301178	9606.ENSP00000416330	0	0	0	0	0.18	0.051	0	0.53	0.602
AXL	TGFB2	9606.ENSP00000301178	9606.ENSP00000355896	0	0	0	0	0.084	0.126	0	0.597	0.649
AXL	STAT1	9606.ENSP00000301178	9606.ENSP00000354394	0	0	0	0	0.056	0.096	0	0.647	0.672
AXL	PLCG2	9606.ENSP00000301178	9606.ENSP00000482457	0	0	0	0	0	0	0.9	0.22	0.918
BLVRA	PTEN	9606.ENSP00000385757	9606.ENSP00000361021	0	0	0	0	0.053	0	0	0.412	0.42
BUB1	GMNN	9606.ENSP00000302530	9606.ENSP00000230056	0	0	0	0	0.34	0	0	0.305	0.521
BUB1	KIF11	9606.ENSP00000302530	9606.ENSP00000260731	0	0	0	0	0.912	0.31	0	0.774	0.985
BUB1	TPX2	9606.ENSP00000302530	9606.ENSP00000300403	0	0	0	0	0.847	0	0	0.74	0.958
BUB1	ZNF207	9606.ENSP00000302530	9606.ENSP00000378165	0	0	0	0	0.06	0.268	0	0.389	0.543
BUB1	RAD51	9606.ENSP00000302530	9606.ENSP00000493712	0	0	0	0	0.653	0.071	0	0.519	0.832
BUB1	TYMS	9606.ENSP00000302530	9606.ENSP00000315644	0	0	0	0	0.768	0	0	0.365	0.846
BUB1	CKAP2	9606.ENSP00000302530	9606.ENSP00000367276	0	0	0	0	0.746	0	0	0.544	0.879
BUB1	CDCA2	9606.ENSP00000302530	9606.ENSP00000328228	0	0	0	0	0.798	0	0	0.479	0.89
BUB1	KIFC1	9606.ENSP00000302530	9606.ENSP00000393963	0	0	0	0	0.746	0.136	0	0.649	0.916
BUB1	UBE2C	9606.ENSP00000302530	9606.ENSP00000348838	0	0	0	0	0.887	0	0	0.607	0.954
BUB1	TOP2A	9606.ENSP00000302530	9606.ENSP00000411532	0	0	0	0	0.918	0	0	0.79	0.982
BUB1	MAD1L1	9606.ENSP00000302530	9606.ENSP00000385334	0	0	0	0	0	0.959	0.9	0.642	0.998
BUB1	CDK1	9606.ENSP00000302530	9606.ENSP00000378699	0	0	0	0	0.89	0.354	0.4	0.964	0.998
BUB1	TTK	9606.ENSP00000302530	9606.ENSP00000358813	0	0	0	0	0.989	0.292	0	0.945	0.999
CCN2	IGFBP2	9606.ENSP00000356954	9606.ENSP00000233809	0	0	0	0	0.067	0	0	0.501	0.514
CCN2	IGFBP5	9606.ENSP00000356954	9606.ENSP00000233813	0	0	0	0	0.141	0	0	0.424	0.484
CCN2	IL1A	9606.ENSP00000356954	9606.ENSP00000263339	0	0	0	0	0.067	0	0	0.507	0.52
CCN2	RPTOR	9606.ENSP00000356954	9606.ENSP00000307272	0	0	0	0	0	0	0	0.43	0.43
CCN2	TGFB2	9606.ENSP00000356954	9606.ENSP00000355896	0	0	0	0	0.188	0	0	0.675	0.725
CCN2	EFEMP1	9606.ENSP00000356954	9606.ENSP00000378058	0	0	0	0	0.246	0	0	0.25	0.411
CCN2	PTEN	9606.ENSP00000356954	9606.ENSP00000361021	0	0	0	0	0	0	0	0.455	0.455
CCN2	TGFBI	9606.ENSP00000356954	9606.ENSP00000416330	0	0	0	0	0.153	0	0	0.446	0.511
CCN2	TAGLN	9606.ENSP00000356954	9606.ENSP00000376678	0	0	0	0	0.364	0	0	0.632	0.756
CCN2	IL6	9606.ENSP00000356954	9606.ENSP00000385675	0	0	0	0	0.168	0	0	0.736	0.771
CCN2	TGFBR1	9606.ENSP00000356954	9606.ENSP00000447297	0	0	0	0	0	0	0	0.775	0.775
CD40LG	PSMA2	9606.ENSP00000359663	9606.ENSP00000223321	0	0	0	0	0	0	0.4	0	0.4
CD40LG	IL1A	9606.ENSP00000359663	9606.ENSP00000263339	0	0	0	0	0.067	0	0	0.794	0.8
CD40LG	PSMA5	9606.ENSP00000359663	9606.ENSP00000271308	0	0	0	0	0	0	0.4	0	0.4
CD40LG	TLR8	9606.ENSP00000359663	9606.ENSP00000312082	0	0	0	0	0.19	0	0	0.48	0.561
CD40LG	STAT1	9606.ENSP00000359663	9606.ENSP00000354394	0	0	0	0	0.076	0	0	0.536	0.553
CD40LG	CHUK	9606.ENSP00000359663	9606.ENSP00000359424	0	0	0	0	0.067	0	0	0.483	0.497
CD40LG	FAS	9606.ENSP00000359663	9606.ENSP00000498466	0	0	0	0	0.086	0	0	0.743	0.755
CD40LG	IL6	9606.ENSP00000359663	9606.ENSP00000385675	0	0	0	0	0	0	0	0.795	0.795
CDCA2	GMNN	9606.ENSP00000328228	9606.ENSP00000230056	0	0	0	0	0.205	0	0	0.409	0.511
CDCA2	KIF11	9606.ENSP00000328228	9606.ENSP00000260731	0	0	0	0	0.853	0	0	0.372	0.904
CDCA2	TPX2	9606.ENSP00000328228	9606.ENSP00000300403	0	0	0	0	0.738	0	0	0.305	0.81
CDCA2	TYMS	9606.ENSP00000328228	9606.ENSP00000315644	0	0	0	0	0.337	0	0	0.222	0.463
CDCA2	CKAP2	9606.ENSP00000328228	9606.ENSP00000367276	0	0	0	0	0.485	0	0	0.288	0.618
CDCA2	KIFC1	9606.ENSP00000328228	9606.ENSP00000393963	0	0	0	0	0.51	0	0	0.284	0.634
CDCA2	UBE2C	9606.ENSP00000328228	9606.ENSP00000348838	0	0	0	0	0.519	0	0	0.364	0.681
CDCA2	TOP2A	9606.ENSP00000328228	9606.ENSP00000411532	0	0	0	0	0.707	0	0	0.31	0.789
CDCA2	CDK1	9606.ENSP00000328228	9606.ENSP00000378699	0	0	0	0	0.606	0.292	0	0.447	0.832
CDCA2	TTK	9606.ENSP00000328228	9606.ENSP00000358813	0	0	0	0	0.834	0	0	0.26	0.872
CDK1	RBX1	9606.ENSP00000378699	9606.ENSP00000216225	0	0	0	0	0.108	0.068	0	0.366	0.428
CDK1	GMNN	9606.ENSP00000378699	9606.ENSP00000230056	0	0	0	0	0.52	0.623	0	0.325	0.867
CDK1	EIF2AK2	9606.ENSP00000378699	9606.ENSP00000233057	0	0	0.158	0.669	0.092	0.292	0	0.131	0.467
CDK1	KIF11	9606.ENSP00000378699	9606.ENSP00000260731	0	0	0	0	0.858	0.364	0	0.869	0.987
CDK1	TOPBP1	9606.ENSP00000378699	9606.ENSP00000260810	0	0	0	0	0.219	0.07	0	0.495	0.602
CDK1	HMGB2	9606.ENSP00000378699	9606.ENSP00000296503	0	0	0	0	0.489	0.051	0	0.102	0.526
CDK1	TPX2	9606.ENSP00000378699	9606.ENSP00000300403	0	0	0	0	0.825	0.045	0	0.736	0.952
CDK1	INSR	9606.ENSP00000378699	9606.ENSP00000303830	0	0	0	0.614	0	0.098	0	0.425	0.459
CDK1	TERT	9606.ENSP00000378699	9606.ENSP00000309572	0	0	0	0	0.101	0	0	0.451	0.485
CDK1	PRKDC	9606.ENSP00000378699	9606.ENSP00000313420	0	0	0	0	0.152	0.058	0	0.467	0.537
CDK1	TYMS	9606.ENSP00000378699	9606.ENSP00000315644	0	0	0	0	0.745	0	0	0.418	0.846
CDK1	PSEN1	9606.ENSP00000378699	9606.ENSP00000326366	0	0	0	0	0.044	0	0	0.475	0.476
CDK1	UBE2C	9606.ENSP00000378699	9606.ENSP00000348838	0	0	0	0	0.86	0.091	0.5	0.758	0.982
CDK1	STAT1	9606.ENSP00000378699	9606.ENSP00000354394	0	0	0	0	0.094	0.093	0	0.348	0.417
CDK1	LMNA	9606.ENSP00000378699	9606.ENSP00000357283	0	0	0	0	0.103	0	0.4	0.337	0.612
CDK1	NRAS	9606.ENSP00000378699	9606.ENSP00000358548	0	0	0	0	0.147	0.095	0	0.355	0.459
CDK1	TTK	9606.ENSP00000378699	9606.ENSP00000358813	0	0	0	0.646	0.862	0.099	0	0.301	0.905
CDK1	XIAP	9606.ENSP00000378699	9606.ENSP00000360242	0	0	0	0	0.208	0.292	0	0.454	0.667
CDK1	PTEN	9606.ENSP00000378699	9606.ENSP00000361021	0	0	0	0	0.078	0.126	0	0.561	0.616
CDK1	RBL1	9606.ENSP00000378699	9606.ENSP00000362768	0	0	0	0	0.152	0.139	0.5	0.185	0.663
CDK1	CKAP2	9606.ENSP00000378699	9606.ENSP00000367276	0	0	0	0	0.686	0.045	0	0.515	0.842
CDK1	TP73	9606.ENSP00000378699	9606.ENSP00000367545	0	0	0	0	0.05	0.292	0	0.243	0.446
CDK1	PCNA	9606.ENSP00000378699	9606.ENSP00000368458	0	0	0	0	0.605	0.6	0	0.595	0.93
CDK1	SUMO1	9606.ENSP00000378699	9606.ENSP00000376077	0	0	0	0	0.088	0	0	0.414	0.443
CDK1	CREB1	9606.ENSP00000378699	9606.ENSP00000387699	0	0	0	0	0.049	0.292	0	0.32	0.502
CDK1	IL6	9606.ENSP00000378699	9606.ENSP00000385675	0	0	0	0	0.084	0	0	0.595	0.613
CDK1	MAD1L1	9606.ENSP00000378699	9606.ENSP00000385334	0	0	0	0	0.047	0.054	0.4	0.536	0.715
CDK1	KIFC1	9606.ENSP00000378699	9606.ENSP00000393963	0	0	0	0	0.614	0.096	0	0.41	0.776
CDK1	RAD51	9606.ENSP00000378699	9606.ENSP00000493712	0	0	0	0	0.6	0.071	0	0.596	0.837
CDK1	XPO1	9606.ENSP00000378699	9606.ENSP00000384863	0	0	0	0	0.137	0.052	0.75	0.436	0.869
CDK1	TOP2A	9606.ENSP00000378699	9606.ENSP00000411532	0	0	0	0	0.96	0.053	0	0.943	0.997
CDK18	TOP2A	9606.ENSP00000423665	9606.ENSP00000411532	0	0	0	0	0.303	0.053	0	0.171	0.405
CHUK	EIF2AK2	9606.ENSP00000359424	9606.ENSP00000233057	0	0	0.154	0.575	0.072	0.51	0.9	0.505	0.977
CHUK	IL1A	9606.ENSP00000359424	9606.ENSP00000263339	0	0	0	0	0	0	0	0.714	0.714
CHUK	NOTCH3	9606.ENSP00000359424	9606.ENSP00000263388	0	0	0	0	0.067	0.098	0	0.497	0.539
CHUK	HSPA9	9606.ENSP00000359424	9606.ENSP00000297185	0	0	0	0	0.074	0.398	0	0.336	0.597
CHUK	RPTOR	9606.ENSP00000359424	9606.ENSP00000307272	0	0	0	0	0.06	0.3	0	0.327	0.519
CHUK	TLR8	9606.ENSP00000359424	9606.ENSP00000312082	0	0	0	0	0.076	0.1	0	0.65	0.684
CHUK	PRKDC	9606.ENSP00000359424	9606.ENSP00000313420	0	0	0	0	0.049	0.315	0	0.216	0.445
CHUK	TBK1	9606.ENSP00000359424	9606.ENSP00000329967	0	0	0	0.59	0.351	0	0	0.947	0.964
CHUK	UBE2V1	9606.ENSP00000359424	9606.ENSP00000340305	0	0	0	0	0.052	0	0.5	0.5	0.742
CHUK	NBR1	9606.ENSP00000359424	9606.ENSP00000343479	0	0	0	0	0	0.347	0	0.227	0.474
CHUK	STAT1	9606.ENSP00000359424	9606.ENSP00000354394	0	0	0	0	0.049	0.096	0	0.522	0.554
CHUK	DHX9	9606.ENSP00000359424	9606.ENSP00000356520	0	0	0	0	0.081	0.053	0	0.497	0.524
CHUK	CREB1	9606.ENSP00000359424	9606.ENSP00000387699	0	0	0	0	0.131	0	0	0.403	0.459
CHUK	TP73	9606.ENSP00000359424	9606.ENSP00000367545	0	0	0	0	0.058	0.51	0	0.066	0.531
CHUK	NLRX1	9606.ENSP00000359424	9606.ENSP00000387334	0	0	0	0	0.057	0.095	0.5	0.372	0.696
CHUK	IL6	9606.ENSP00000359424	9606.ENSP00000385675	0	0	0	0	0.058	0	0	0.708	0.713
CHUK	XIAP	9606.ENSP00000359424	9606.ENSP00000360242	0	0	0	0	0.067	0.092	0.5	0.526	0.772
CHUK	PTEN	9606.ENSP00000359424	9606.ENSP00000361021	0	0	0	0	0.089	0.329	0.9	0.487	0.964
CKAP2	KIF11	9606.ENSP00000367276	9606.ENSP00000260731	0	0	0	0	0.773	0	0	0.309	0.836
CKAP2	TPX2	9606.ENSP00000367276	9606.ENSP00000300403	0	0	0	0	0.373	0	0	0.297	0.54
CKAP2	UBE2C	9606.ENSP00000367276	9606.ENSP00000348838	0	0	0	0	0.389	0.292	0	0.306	0.674
CKAP2	TTK	9606.ENSP00000367276	9606.ENSP00000358813	0	0	0	0	0.786	0	0	0.411	0.868
CKAP2	KIFC1	9606.ENSP00000367276	9606.ENSP00000393963	0	0	0	0	0.322	0	0	0.161	0.407
CKAP2	TOP2A	9606.ENSP00000367276	9606.ENSP00000411532	0	0	0	0	0.854	0	0	0.333	0.898
CNOT6L	PTEN	9606.ENSP00000424896	9606.ENSP00000361021	0	0	0	0	0.102	0	0	0.509	0.54
CREB1	TBP	9606.ENSP00000387699	9606.ENSP00000230354	0	0	0	0	0.164	0	0	0.697	0.735
CREB1	IL1A	9606.ENSP00000387699	9606.ENSP00000263339	0	0	0	0	0	0	0	0.475	0.475
CREB1	NOTCH3	9606.ENSP00000387699	9606.ENSP00000263388	0	0	0	0	0.086	0	0	0.478	0.502
CREB1	EPAS1	9606.ENSP00000387699	9606.ENSP00000263734	0	0	0	0	0.066	0	0	0.61	0.62
CREB1	MED1	9606.ENSP00000387699	9606.ENSP00000300651	0	0	0	0	0.236	0	0	0.247	0.4
CREB1	STK11	9606.ENSP00000387699	9606.ENSP00000324856	0	0	0	0	0.091	0	0	0.471	0.498
CREB1	PSEN1	9606.ENSP00000387699	9606.ENSP00000326366	0	0	0	0	0.082	0	0	0.491	0.513
CREB1	STAT1	9606.ENSP00000387699	9606.ENSP00000354394	0	0	0	0	0.117	0	0	0.721	0.743
CREB1	PRKN	9606.ENSP00000387699	9606.ENSP00000355865	0	0	0	0	0	0	0	0.552	0.552
CREB1	NRAS	9606.ENSP00000387699	9606.ENSP00000358548	0	0	0	0	0.163	0.07	0	0.292	0.401
CREB1	PTEN	9606.ENSP00000387699	9606.ENSP00000361021	0	0	0	0	0.06	0.292	0	0.591	0.704
CREB1	MTHFD2	9606.ENSP00000387699	9606.ENSP00000377617	0	0	0	0	0.042	0	0	0.404	0.405
CREB1	KDM1A	9606.ENSP00000387699	9606.ENSP00000383042	0	0	0	0	0.064	0	0	0.586	0.595
CREB1	IL6	9606.ENSP00000387699	9606.ENSP00000385675	0	0	0	0	0.083	0	0.75	0.674	0.918
CREB1	TGFBR1	9606.ENSP00000387699	9606.ENSP00000447297	0	0	0	0	0.208	0	0	0.279	0.405
CTSB	IL1A	9606.ENSP00000345672	9606.ENSP00000263339	0	0	0	0	0	0	0	0.52	0.52
CTSB	PSEN1	9606.ENSP00000345672	9606.ENSP00000326366	0	0	0	0	0.049	0	0	0.467	0.472
CTSB	TOP2A	9606.ENSP00000345672	9606.ENSP00000411532	0	0	0	0	0.042	0	0	0.444	0.444
CTSB	SUMO1	9606.ENSP00000345672	9606.ENSP00000376077	0	0	0	0	0.105	0.046	0	0.414	0.457
CTSB	TGFBI	9606.ENSP00000345672	9606.ENSP00000416330	0	0	0	0	0.218	0	0	0.476	0.573
CTSB	IL6	9606.ENSP00000345672	9606.ENSP00000385675	0	0	0	0	0.112	0	0	0.601	0.631
CTSB	LAMP2	9606.ENSP00000345672	9606.ENSP00000408411	0	0	0	0	0.158	0.102	0	0.667	0.726
CTSB	XIAP	9606.ENSP00000345672	9606.ENSP00000360242	0	0	0	0	0.042	0	0.65	0.307	0.747
DHCR24	HMGCR	9606.ENSP00000360316	9606.ENSP00000287936	0	0	0	0	0.286	0	0	0.77	0.829
DHX9	TBP	9606.ENSP00000356520	9606.ENSP00000230354	0	0	0	0	0.063	0.292	0	0.185	0.413
DHX9	EIF2AK2	9606.ENSP00000356520	9606.ENSP00000233057	0	0	0	0	0.102	0.612	0	0.494	0.808
DHX9	TPX2	9606.ENSP00000356520	9606.ENSP00000300403	0	0	0	0	0.147	0.086	0	0.387	0.481
DHX9	GEMIN2	9606.ENSP00000356520	9606.ENSP00000308533	0	0	0	0	0.092	0.315	0	0.251	0.494
DHX9	PRKDC	9606.ENSP00000356520	9606.ENSP00000313420	0	0	0	0	0.154	0.326	0	0.579	0.74
DHX9	TBK1	9606.ENSP00000356520	9606.ENSP00000329967	0	0	0	0	0.067	0.053	0	0.512	0.532
DHX9	METTL14	9606.ENSP00000356520	9606.ENSP00000373474	0	0	0	0	0.072	0.292	0	0.192	0.423
DHX9	KDM1A	9606.ENSP00000356520	9606.ENSP00000383042	0	0	0	0	0.067	0.292	0	0.202	0.427
DHX9	SUMO1	9606.ENSP00000356520	9606.ENSP00000376077	0	0	0	0	0.276	0.111	0	0.184	0.429
DHX9	RAD51	9606.ENSP00000356520	9606.ENSP00000493712	0	0	0	0	0.068	0.047	0	0.42	0.44
DHX9	TOP2A	9606.ENSP00000356520	9606.ENSP00000411532	0.044	0	0	0	0.107	0.347	0	0.242	0.521
DHX9	NRAS	9606.ENSP00000356520	9606.ENSP00000358548	0	0	0	0	0.12	0.091	0	0.478	0.547
DHX9	IFI16	9606.ENSP00000356520	9606.ENSP00000357113	0	0	0	0	0.064	0.292	0	0.48	0.625
DHX9	XPO1	9606.ENSP00000356520	9606.ENSP00000384863	0	0	0	0	0.315	0.294	0	0.602	0.791
EFEMP1	TGFB2	9606.ENSP00000378058	9606.ENSP00000355896	0	0	0	0	0.153	0.294	0	0.186	0.471
EFEMP1	TGFBR1	9606.ENSP00000378058	9606.ENSP00000447297	0	0	0	0	0.048	0.098	0	0.453	0.489
EIF2AK2	LMNA	9606.ENSP00000233057	9606.ENSP00000357283	0	0	0	0	0.069	0.292	0	0.195	0.423
EIF2AK2	XIAP	9606.ENSP00000233057	9606.ENSP00000360242	0	0	0	0	0.126	0	0	0.37	0.426
EIF2AK2	IL1A	9606.ENSP00000233057	9606.ENSP00000263339	0	0	0	0	0.062	0	0	0.418	0.43
EIF2AK2	SUMO1	9606.ENSP00000233057	9606.ENSP00000376077	0	0	0	0	0.06	0.292	0	0.219	0.434
EIF2AK2	PTEN	9606.ENSP00000233057	9606.ENSP00000361021	0	0	0	0	0.044	0.292	0	0.323	0.501
EIF2AK2	TLR8	9606.ENSP00000233057	9606.ENSP00000312082	0	0	0	0	0.088	0.07	0	0.548	0.583
EIF2AK2	IL6	9606.ENSP00000233057	9606.ENSP00000385675	0	0	0	0	0.089	0	0	0.595	0.616
EIF2AK2	IFI16	9606.ENSP00000233057	9606.ENSP00000357113	0	0	0	0	0.202	0.51	0	0.478	0.778
EIF2AK2	STAT1	9606.ENSP00000233057	9606.ENSP00000354394	0	0	0	0	0.692	0.51	0.4	0.806	0.98
EPAS1	RBX1	9606.ENSP00000263734	9606.ENSP00000216225	0	0	0	0	0	0	0.9	0.42	0.939
EPAS1	PSMA2	9606.ENSP00000263734	9606.ENSP00000223321	0	0	0	0	0	0	0.4	0	0.4
EPAS1	PLCG2	9606.ENSP00000263734	9606.ENSP00000482457	0	0	0	0	0.049	0	0	0.403	0.407
EPAS1	PSMA5	9606.ENSP00000263734	9606.ENSP00000271308	0	0	0	0	0.053	0	0.4	0	0.407
EPAS1	SENP1	9606.ENSP00000263734	9606.ENSP00000394791	0	0	0	0	0	0.073	0	0.473	0.49
EPAS1	PTEN	9606.ENSP00000263734	9606.ENSP00000361021	0	0	0	0	0	0	0	0.553	0.553
EPAS1	TGFBR1	9606.ENSP00000263734	9606.ENSP00000447297	0	0	0	0	0.055	0.071	0	0.541	0.562
EPAS1	IL6	9606.ENSP00000263734	9606.ENSP00000385675	0	0	0	0	0.126	0	0	0.526	0.568
EPAS1	STAT1	9606.ENSP00000263734	9606.ENSP00000354394	0	0	0	0	0.055	0.045	0	0.57	0.578
EPAS1	SUMO1	9606.ENSP00000263734	9606.ENSP00000376077	0	0	0	0	0.077	0.297	0	0.435	0.601
EPAS1	NBR1	9606.ENSP00000263734	9606.ENSP00000343479	0	0	0	0	0	0	0.75	0.18	0.786
FAS	IL1A	9606.ENSP00000498466	9606.ENSP00000263339	0	0	0	0	0.074	0	0	0.595	0.609
FAS	STAT1	9606.ENSP00000498466	9606.ENSP00000354394	0	0	0	0	0.167	0	0	0.402	0.481
FAS	XIAP	9606.ENSP00000498466	9606.ENSP00000360242	0	0	0	0	0	0	0	0.695	0.695
FAS	TP73	9606.ENSP00000498466	9606.ENSP00000367545	0	0	0	0	0	0	0.5	0.14	0.552
FAS	SUMO1	9606.ENSP00000498466	9606.ENSP00000376077	0	0	0	0	0.056	0.474	0	0.145	0.538
FAS	IL6	9606.ENSP00000498466	9606.ENSP00000385675	0	0	0	0	0.106	0	0	0.584	0.613
FAS	TGFBI	9606.ENSP00000498466	9606.ENSP00000416330	0	0	0	0	0.105	0	0	0.447	0.483
FXR1	HSPA9	9606.ENSP00000350170	9606.ENSP00000297185	0	0	0	0	0.146	0.069	0	0.366	0.452
FXR1	XPO1	9606.ENSP00000350170	9606.ENSP00000384863	0	0	0	0	0.203	0	0	0.368	0.474
FXR1	LMNA	9606.ENSP00000350170	9606.ENSP00000357283	0	0	0	0	0.042	0.046	0.5	0.069	0.518
FXR1	IFI16	9606.ENSP00000350170	9606.ENSP00000357113	0	0	0	0	0.047	0.51	0	0.069	0.527
FXR1	NRAS	9606.ENSP00000350170	9606.ENSP00000358548	0	0	0	0	0.086	0.091	0.4	0.173	0.533
GMNN	PSMA2	9606.ENSP00000230056	9606.ENSP00000223321	0	0	0	0	0.214	0	0.4	0	0.508
GMNN	RAD51	9606.ENSP00000230056	9606.ENSP00000493712	0	0	0	0	0.322	0	0	0.208	0.44
GMNN	PSMA5	9606.ENSP00000230056	9606.ENSP00000271308	0	0	0	0	0.129	0	0.4	0.062	0.466
GMNN	TTK	9606.ENSP00000230056	9606.ENSP00000358813	0	0	0	0	0.376	0	0	0.246	0.51
GMNN	TOP2A	9606.ENSP00000230056	9606.ENSP00000411532	0	0	0	0	0.341	0	0	0.311	0.527
GMNN	PCNA	9606.ENSP00000230056	9606.ENSP00000368458	0	0	0	0	0.557	0	0	0	0.557
GMNN	TYMS	9606.ENSP00000230056	9606.ENSP00000315644	0	0	0	0	0.385	0	0	0.312	0.559
GMNN	KIF11	9606.ENSP00000230056	9606.ENSP00000260731	0	0	0	0	0.418	0	0	0.391	0.631
GMNN	UBE2C	9606.ENSP00000230056	9606.ENSP00000348838	0	0	0	0	0.298	0	0.4	0.321	0.689
GNMT	TYMS	9606.ENSP00000361894	9606.ENSP00000315644	0	0	0	0	0	0	0	0.486	0.486
GNMT	MAD1L1	9606.ENSP00000361894	9606.ENSP00000385334	0	0	0	0	0	0	0	0.423	0.422
HK3	TLR8	9606.ENSP00000292432	9606.ENSP00000312082	0	0	0	0	0.762	0	0	0	0.762
HMGB2	HMGCR	9606.ENSP00000296503	9606.ENSP00000287936	0	0	0	0	0.064	0	0	0.436	0.449
HMGB2	TOP2A	9606.ENSP00000296503	9606.ENSP00000411532	0	0	0	0	0.435	0.125	0	0.091	0.512
HMGCR	TBP	9606.ENSP00000287936	9606.ENSP00000230354	0	0	0	0	0.049	0.422	0	0.353	0.613
HMGCR	TOP2A	9606.ENSP00000287936	9606.ENSP00000411532	0	0	0	0	0.06	0	0	0.391	0.403
HMGCR	PSEN1	9606.ENSP00000287936	9606.ENSP00000326366	0	0	0	0	0.074	0	0	0.396	0.417
HMGCR	TERT	9606.ENSP00000287936	9606.ENSP00000309572	0	0	0	0	0	0	0	0.423	0.423
HMGCR	MED1	9606.ENSP00000287936	9606.ENSP00000300651	0	0	0	0	0.06	0	0.4	0.068	0.428
HMGCR	PEX5	9606.ENSP00000287936	9606.ENSP00000391601	0	0	0	0	0.049	0	0	0.428	0.432
HMGCR	STK11	9606.ENSP00000287936	9606.ENSP00000324856	0	0	0	0	0	0.054	0	0.489	0.496
HMGCR	IL6	9606.ENSP00000287936	9606.ENSP00000385675	0	0	0	0	0	0	0	0.59	0.59
HMGCR	MORC3	9606.ENSP00000287936	9606.ENSP00000383333	0	0	0	0	0	0	0	0.623	0.623
HMGCR	VCP	9606.ENSP00000287936	9606.ENSP00000351777	0	0	0	0	0.088	0.436	0	0.631	0.793
HSPA9	PSMA2	9606.ENSP00000297185	9606.ENSP00000223321	0	0	0	0	0.249	0.071	0	0.224	0.412
HSPA9	PSMA5	9606.ENSP00000297185	9606.ENSP00000271308	0	0	0	0	0.346	0.071	0	0.229	0.49
HSPA9	XPO1	9606.ENSP00000297185	9606.ENSP00000384863	0	0	0	0	0.109	0.166	0	0.273	0.413
HSPA9	TP73	9606.ENSP00000297185	9606.ENSP00000367545	0	0	0	0	0.05	0.424	0	0.065	0.444
HSPA9	HYOU1	9606.ENSP00000297185	9606.ENSP00000480150	0	0	0.124	0.635	0.083	0	0	0.457	0.526
HSPA9	VCP	9606.ENSP00000297185	9606.ENSP00000351777	0.042	0	0	0	0.147	0.073	0	0.592	0.65
HSPA9	PRKN	9606.ENSP00000297185	9606.ENSP00000355865	0	0	0	0	0	0.484	0	0.642	0.807
HYOU1	VCP	9606.ENSP00000480150	9606.ENSP00000351777	0.042	0	0	0	0.096	0.176	0	0.701	0.759
HYOU1	IL6	9606.ENSP00000480150	9606.ENSP00000385675	0	0	0	0	0.093	0	0	0.513	0.539
IFI16	IL1A	9606.ENSP00000357113	9606.ENSP00000263339	0	0	0	0	0.067	0	0	0.585	0.596
IFI16	TLR8	9606.ENSP00000357113	9606.ENSP00000312082	0	0	0	0	0.128	0	0	0.485	0.532
IFI16	TBK1	9606.ENSP00000357113	9606.ENSP00000329967	0	0	0	0	0.097	0	0.4	0.816	0.892
IFI16	SUV39H1	9606.ENSP00000357113	9606.ENSP00000337976	0	0	0	0	0.067	0	0	0.52	0.533
IFI16	STAT1	9606.ENSP00000357113	9606.ENSP00000354394	0	0	0	0	0.257	0	0	0.68	0.752
IFI16	RAD51	9606.ENSP00000357113	9606.ENSP00000493712	0	0	0	0	0	0	0	0.443	0.443
IFI16	IL6	9606.ENSP00000357113	9606.ENSP00000385675	0	0	0	0	0.124	0	0	0.4	0.452
IFI16	SUMO1	9606.ENSP00000357113	9606.ENSP00000376077	0	0	0	0	0.06	0.292	0	0.349	0.529
IGFBP2	PTEN	9606.ENSP00000233809	9606.ENSP00000361021	0	0	0	0	0	0	0	0.437	0.437
IGFBP2	IL1A	9606.ENSP00000233809	9606.ENSP00000263339	0	0	0	0	0	0	0	0.546	0.546
IGFBP2	IL6	9606.ENSP00000233809	9606.ENSP00000385675	0	0	0	0	0	0	0	0.646	0.646
IGFBP5	NOTCH3	9606.ENSP00000233813	9606.ENSP00000263388	0	0	0	0	0.212	0	0	0.305	0.429
IGFBP5	IL1A	9606.ENSP00000233813	9606.ENSP00000263339	0	0	0	0	0	0	0	0.504	0.504
IGFBP5	INSR	9606.ENSP00000233813	9606.ENSP00000303830	0	0	0	0	0.066	0	0	0.576	0.588
IGFBP5	IL6	9606.ENSP00000233813	9606.ENSP00000385675	0	0	0	0	0.06	0	0	0.689	0.695
IL1A	TLR10	9606.ENSP00000263339	9606.ENSP00000308925	0	0	0	0	0.079	0	0	0.41	0.434
IL1A	PTEN	9606.ENSP00000263339	9606.ENSP00000361021	0	0	0	0	0	0	0	0.445	0.445
IL1A	TBK1	9606.ENSP00000263339	9606.ENSP00000329967	0	0	0	0	0	0	0	0.447	0.447
IL1A	TLR8	9606.ENSP00000263339	9606.ENSP00000312082	0	0	0	0	0.058	0	0	0.552	0.559
IL1A	TGFB2	9606.ENSP00000263339	9606.ENSP00000355896	0	0	0	0	0.094	0	0	0.542	0.568
IL1A	STAT1	9606.ENSP00000263339	9606.ENSP00000354394	0	0	0	0	0.083	0	0	0.73	0.741
IL1A	IL6	9606.ENSP00000263339	9606.ENSP00000385675	0	0	0	0	0.376	0	0.4	0.974	0.989
IL6	TBP	9606.ENSP00000385675	9606.ENSP00000230354	0	0	0	0	0.063	0	0	0.47	0.482
IL6	KDM6B	9606.ENSP00000385675	9606.ENSP00000254846	0	0	0	0	0.076	0	0	0.427	0.449
IL6	KIF11	9606.ENSP00000385675	9606.ENSP00000260731	0	0	0	0	0	0	0	0.432	0.432
IL6	NOTCH3	9606.ENSP00000385675	9606.ENSP00000263388	0	0	0	0	0.055	0	0	0.41	0.418
IL6	TLR10	9606.ENSP00000385675	9606.ENSP00000308925	0	0	0	0	0.067	0	0	0.644	0.654
IL6	TERT	9606.ENSP00000385675	9606.ENSP00000309572	0	0	0	0	0	0	0	0.479	0.479
IL6	TLR8	9606.ENSP00000385675	9606.ENSP00000312082	0	0	0	0	0.102	0	0	0.808	0.821
IL6	STK11	9606.ENSP00000385675	9606.ENSP00000324856	0	0	0	0	0.086	0	0	0.567	0.587
IL6	PSEN1	9606.ENSP00000385675	9606.ENSP00000326366	0	0	0	0	0	0	0	0.442	0.442
IL6	TBK1	9606.ENSP00000385675	9606.ENSP00000329967	0	0	0	0	0.102	0	0	0.629	0.653
IL6	UBE2C	9606.ENSP00000385675	9606.ENSP00000348838	0	0	0	0	0.055	0	0.4	0.347	0.597
IL6	STAT1	9606.ENSP00000385675	9606.ENSP00000354394	0	0	0	0	0.11	0.087	0.5	0.941	0.972
IL6	TGFB2	9606.ENSP00000385675	9606.ENSP00000355896	0	0	0	0	0.079	0	0	0.812	0.819
IL6	LMNA	9606.ENSP00000385675	9606.ENSP00000357283	0	0	0	0	0.104	0	0	0.48	0.514
IL6	XIAP	9606.ENSP00000385675	9606.ENSP00000360242	0	0	0	0	0	0	0	0.506	0.506
IL6	PTEN	9606.ENSP00000385675	9606.ENSP00000361021	0	0	0	0	0	0	0	0.681	0.681
IL6	SUMO1	9606.ENSP00000385675	9606.ENSP00000376077	0	0	0	0	0	0	0	0.509	0.509
IL6	RRAD	9606.ENSP00000385675	9606.ENSP00000388744	0	0	0	0	0.201	0	0	0.293	0.41
IL6	TGFBR1	9606.ENSP00000385675	9606.ENSP00000447297	0	0	0	0	0	0	0	0.505	0.505
INSR	RPTOR	9606.ENSP00000303830	9606.ENSP00000307272	0	0	0	0	0	0.052	0	0.412	0.418
INSR	PTEN	9606.ENSP00000303830	9606.ENSP00000361021	0	0	0	0	0.042	0.18	0	0.489	0.563
ITGB4	TERT	9606.ENSP00000200181	9606.ENSP00000309572	0	0	0	0	0.042	0	0	0.421	0.421
KCNA1	MED1	9606.ENSP00000371985	9606.ENSP00000300651	0	0	0	0	0.293	0.298	0	0.09	0.508
KDM1A	USP28	9606.ENSP00000383042	9606.ENSP00000003302	0	0	0	0	0.063	0.51	0	0.416	0.708
KDM1A	TBP	9606.ENSP00000383042	9606.ENSP00000230354	0	0	0	0	0.234	0	0	0.312	0.45
KDM1A	KDM6B	9606.ENSP00000383042	9606.ENSP00000254846	0	0	0	0	0.089	0.075	0	0.706	0.731
KDM1A	PRKDC	9606.ENSP00000383042	9606.ENSP00000313420	0	0	0	0	0.1	0	0.9	0.181	0.919
KDM1A	SUV39H1	9606.ENSP00000383042	9606.ENSP00000337976	0	0	0	0	0.104	0.128	0	0.836	0.861
KDM1A	PRMT6	9606.ENSP00000383042	9606.ENSP00000359095	0	0	0	0	0.072	0	0	0.398	0.417
KDM1A	PTEN	9606.ENSP00000383042	9606.ENSP00000361021	0	0	0	0	0.078	0	0	0.435	0.457
KDM1A	PCNA	9606.ENSP00000383042	9606.ENSP00000368458	0	0	0	0	0.436	0	0	0	0.436
KDM1A	TOP2A	9606.ENSP00000383042	9606.ENSP00000411532	0	0	0	0	0.11	0	0	0.446	0.486
KDM6B	METTL14	9606.ENSP00000254846	9606.ENSP00000373474	0	0	0	0	0.062	0	0	0.477	0.488
KDM6B	MED1	9606.ENSP00000254846	9606.ENSP00000300651	0.046	0	0	0	0.403	0.091	0	0.242	0.555
KDM6B	SUV39H1	9606.ENSP00000254846	9606.ENSP00000337976	0	0	0	0	0.055	0.269	0	0.576	0.682
KIF11	TOPBP1	9606.ENSP00000260731	9606.ENSP00000260810	0	0	0	0	0.348	0	0	0.141	0.416
KIF11	PTEN	9606.ENSP00000260731	9606.ENSP00000361021	0	0	0	0	0.066	0.352	0	0.213	0.482
KIF11	PCNA	9606.ENSP00000260731	9606.ENSP00000368458	0	0	0	0	0.592	0	0	0	0.592
KIF11	MAD1L1	9606.ENSP00000260731	9606.ENSP00000385334	0	0	0	0	0.044	0.544	0	0.155	0.599
KIF11	RAD51	9606.ENSP00000260731	9606.ENSP00000493712	0	0	0	0	0.596	0	0	0.276	0.695
KIF11	TYMS	9606.ENSP00000260731	9606.ENSP00000315644	0	0	0	0	0.636	0	0	0.279	0.726
KIF11	UBE2C	9606.ENSP00000260731	9606.ENSP00000348838	0	0	0	0	0.835	0	0	0.511	0.916
KIF11	KIFC1	9606.ENSP00000260731	9606.ENSP00000393963	0	0	0	0.641	0.718	0.589	0.54	0.393	0.963
KIF11	TPX2	9606.ENSP00000260731	9606.ENSP00000300403	0	0	0	0	0.843	0	0	0.79	0.965
KIF11	TOP2A	9606.ENSP00000260731	9606.ENSP00000411532	0	0	0	0	0.91	0	0	0.735	0.975
KIF11	TTK	9606.ENSP00000260731	9606.ENSP00000358813	0	0	0	0	0.958	0.139	0	0.611	0.984
KIFC1	TPX2	9606.ENSP00000393963	9606.ENSP00000300403	0	0	0	0	0.663	0	0	0.506	0.826
KIFC1	TYMS	9606.ENSP00000393963	9606.ENSP00000315644	0	0	0	0	0.385	0	0	0.155	0.458
KIFC1	UBE2C	9606.ENSP00000393963	9606.ENSP00000348838	0	0	0	0	0.764	0.069	0	0.324	0.839
KIFC1	TTK	9606.ENSP00000393963	9606.ENSP00000358813	0	0	0	0	0.537	0	0	0.442	0.731
KIFC1	MAD1L1	9606.ENSP00000393963	9606.ENSP00000385334	0	0	0	0	0.063	0.296	0	0.208	0.432
KIFC1	TOP2A	9606.ENSP00000393963	9606.ENSP00000411532	0	0	0	0	0.802	0	0	0.317	0.859
LAMP2	RPTOR	9606.ENSP00000408411	9606.ENSP00000307272	0	0	0	0	0.054	0.227	0	0.466	0.575
LAMP2	NBR1	9606.ENSP00000408411	9606.ENSP00000343479	0	0	0	0	0.095	0	0	0.442	0.474
LAMP2	VCP	9606.ENSP00000408411	9606.ENSP00000351777	0	0	0	0	0.06	0.292	0	0.266	0.469
LAMP2	PRKN	9606.ENSP00000408411	9606.ENSP00000355865	0	0	0	0	0	0	0	0.433	0.433
LAMP2	LMNA	9606.ENSP00000408411	9606.ENSP00000357283	0	0	0	0	0.074	0	0	0.567	0.583
LIN54	TOP2A	9606.ENSP00000341947	9606.ENSP00000411532	0	0	0	0	0.081	0	0.5	0.135	0.568
LIN54	PCNA	9606.ENSP00000341947	9606.ENSP00000368458	0	0	0	0	0.194	0	0.5	0	0.579
LIN54	RBL1	9606.ENSP00000341947	9606.ENSP00000362768	0	0	0	0	0.193	0.382	0.5	0.297	0.801
LMNA	MCM3AP	9606.ENSP00000357283	9606.ENSP00000291688	0	0	0	0	0.042	0.439	0	0.103	0.475
LMNA	PTEN	9606.ENSP00000357283	9606.ENSP00000361021	0	0	0	0	0	0.292	0	0.305	0.486
LMNA	NRAS	9606.ENSP00000357283	9606.ENSP00000358548	0	0	0	0	0.045	0	0.4	0.185	0.492
LMNA	SENP1	9606.ENSP00000357283	9606.ENSP00000394791	0	0	0	0	0	0.543	0	0.12	0.58
MAD1L1	MCM3AP	9606.ENSP00000385334	9606.ENSP00000291688	0	0	0	0	0.127	0.07	0.9	0.339	0.939
MAD1L1	TTK	9606.ENSP00000385334	9606.ENSP00000358813	0	0	0	0	0	0.747	0.9	0.543	0.987
MCM3AP	XPO1	9606.ENSP00000291688	9606.ENSP00000384863	0	0	0	0	0.111	0.066	0	0.354	0.418
MED1	TBP	9606.ENSP00000300651	9606.ENSP00000230354	0	0	0	0	0.147	0.859	0	0.651	0.954
MEIS2	RBX1	9606.ENSP00000453793	9606.ENSP00000216225	0	0	0	0	0.06	0	0	0.507	0.517
MEIS2	MYBBP1A	9606.ENSP00000453793	9606.ENSP00000370968	0	0	0	0	0	0.071	0	0.461	0.477
METTL14	PTEN	9606.ENSP00000373474	9606.ENSP00000361021	0	0	0	0	0.063	0	0	0.418	0.432
METTL14	TRDMT1	9606.ENSP00000373474	9606.ENSP00000367030	0.12	0	0	0	0.082	0	0	0.569	0.621
MORC3	SUMO1	9606.ENSP00000383333	9606.ENSP00000376077	0	0	0	0	0.059	0.05	0	0.406	0.422
MTHFD2	TYMS	9606.ENSP00000377617	9606.ENSP00000315644	0.12	0	0	0	0.257	0	0.972	0.708	0.994
MYBBP1A	TBP	9606.ENSP00000370968	9606.ENSP00000230354	0	0	0	0	0.049	0	0.5	0.115	0.542
MYBBP1A	PCNA	9606.ENSP00000370968	9606.ENSP00000368458	0	0	0	0	0.067	0.465	0	0	0.479
NBN	TOPBP1	9606.ENSP00000265433	9606.ENSP00000260810	0	0	0	0	0.072	0.583	0.5	0.645	0.922
NBN	PCNA	9606.ENSP00000265433	9606.ENSP00000368458	0	0	0	0	0.06	0.089	0.4	0.07	0.458
NBN	SUMO1	9606.ENSP00000265433	9606.ENSP00000376077	0	0	0	0	0.056	0	0.5	0.126	0.551
NBN	PRKDC	9606.ENSP00000265433	9606.ENSP00000313420	0	0	0	0	0.103	0.292	0.5	0.772	0.918
NBN	RAD51	9606.ENSP00000265433	9606.ENSP00000493712	0	0	0	0	0.042	0.273	0.5	0.811	0.925
NBR1	PSEN1	9606.ENSP00000343479	9606.ENSP00000326366	0	0	0	0	0.215	0.045	0	0.442	0.545
NBR1	TBK1	9606.ENSP00000343479	9606.ENSP00000329967	0	0	0	0	0	0.169	0	0.66	0.705
NBR1	VCP	9606.ENSP00000343479	9606.ENSP00000351777	0	0	0	0	0.135	0.076	0	0.356	0.441
NBR1	PRKN	9606.ENSP00000343479	9606.ENSP00000355865	0	0	0	0	0.042	0.069	0	0.636	0.647
NBR1	PEX5	9606.ENSP00000343479	9606.ENSP00000391601	0	0	0	0	0	0	0.5	0.918	0.957
NLRX1	TLR10	9606.ENSP00000387334	9606.ENSP00000308925	0	0	0	0	0.067	0	0	0.424	0.439
NLRX1	TBK1	9606.ENSP00000387334	9606.ENSP00000329967	0	0	0	0	0.072	0	0	0.726	0.735
NOTCH3	TAGLN	9606.ENSP00000263388	9606.ENSP00000376678	0	0	0	0	0.101	0.127	0	0.41	0.497
NOTCH3	PTEN	9606.ENSP00000263388	9606.ENSP00000361021	0	0	0	0	0.055	0.072	0	0.492	0.516
NOTCH3	STAT1	9606.ENSP00000263388	9606.ENSP00000354394	0	0	0	0	0.055	0.079	0.5	0.299	0.654
NOTCH3	PSEN1	9606.ENSP00000263388	9606.ENSP00000326366	0	0	0	0	0	0.131	0.65	0.479	0.827
NRAS	TERT	9606.ENSP00000358548	9606.ENSP00000309572	0	0	0	0	0.052	0	0	0.675	0.679
NRAS	TYMS	9606.ENSP00000358548	9606.ENSP00000315644	0	0	0	0	0.11	0.143	0	0.304	0.423
NRAS	STK11	9606.ENSP00000358548	9606.ENSP00000324856	0	0	0	0	0.054	0.09	0	0.65	0.673
NRAS	PAK4	9606.ENSP00000358548	9606.ENSP00000469413	0	0	0	0	0.044	0.315	0	0.226	0.449
NRAS	PTEN	9606.ENSP00000358548	9606.ENSP00000361021	0	0	0	0	0.065	0.099	0	0.86	0.872
NUAK1	STK11	9606.ENSP00000261402	9606.ENSP00000324856	0	0	0.121	0.678	0	0.292	0.8	0.51	0.93
NUTF2	PSMA2	9606.ENSP00000219169	9606.ENSP00000223321	0	0	0	0	0.41	0	0	0.08	0.434
NUTF2	SUMO1	9606.ENSP00000219169	9606.ENSP00000376077	0	0	0	0	0.149	0.42	0	0.148	0.543
NUTF2	XPO1	9606.ENSP00000219169	9606.ENSP00000384863	0	0	0	0	0.1	0	0	0.804	0.816
PAK4	VCP	9606.ENSP00000469413	9606.ENSP00000351777	0	0	0	0	0.044	0.049	0.4	0.068	0.423
PAK4	PTEN	9606.ENSP00000469413	9606.ENSP00000361021	0	0	0	0	0.107	0.103	0	0.337	0.423
PCNA	RBX1	9606.ENSP00000368458	9606.ENSP00000216225	0	0	0	0	0.145	0	0.5	0.064	0.564
PCNA	TPX2	9606.ENSP00000368458	9606.ENSP00000300403	0	0	0	0	0.394	0	0	0.127	0.449
PCNA	PRKDC	9606.ENSP00000368458	9606.ENSP00000313420	0	0	0	0	0.14	0.465	0	0.125	0.562
PCNA	TYMS	9606.ENSP00000368458	9606.ENSP00000315644	0.191	0	0	0	0.84	0.088	0	0.35	0.913
PCNA	UBE2C	9606.ENSP00000368458	9606.ENSP00000348838	0	0	0	0	0.405	0.234	0	0.102	0.555
PCNA	VCP	9606.ENSP00000368458	9606.ENSP00000351777	0.061	0	0	0	0.082	0.127	0.5	0.134	0.614
PCNA	PRKN	9606.ENSP00000368458	9606.ENSP00000355865	0	0	0	0	0	0.6	0	0	0.6
PCNA	TOP2A	9606.ENSP00000368458	9606.ENSP00000411532	0.12	0	0	0	0.55	0.224	0	0.394	0.789
PCNA	SUMO1	9606.ENSP00000368458	9606.ENSP00000376077	0	0	0	0	0.299	0.696	0.4	0.183	0.881
PCNA	RAD51	9606.ENSP00000368458	9606.ENSP00000493712	0.042	0	0	0	0.507	0.682	0.4	0.41	0.937
PEX5	VCP	9606.ENSP00000391601	9606.ENSP00000351777	0	0	0	0	0.044	0.124	0	0.363	0.42
PIR	SUV39H1	9606.ENSP00000369786	9606.ENSP00000337976	0	0	0	0	0.076	0	0	0.444	0.464
PLCG2	STAT1	9606.ENSP00000482457	9606.ENSP00000354394	0	0	0	0	0.067	0	0.5	0.308	0.648
PLCG2	PTEN	9606.ENSP00000482457	9606.ENSP00000361021	0	0	0	0	0.062	0	0.9	0.332	0.931
POLG	STAT1	9606.ENSP00000399851	9606.ENSP00000354394	0	0	0	0	0.067	0	0	0.392	0.409
POLG	PRKN	9606.ENSP00000399851	9606.ENSP00000355865	0	0	0	0	0	0.088	0	0.524	0.548
PRKDC	TOPBP1	9606.ENSP00000313420	9606.ENSP00000260810	0	0	0	0	0.147	0	0	0.563	0.612
PRKDC	STK32C	9606.ENSP00000313420	9606.ENSP00000298630	0	0	0	0	0	0.37	0	0.158	0.447
PRKDC	RPTOR	9606.ENSP00000313420	9606.ENSP00000307272	0	0	0	0	0.115	0.777	0	0.424	0.876
PRKDC	TERT	9606.ENSP00000313420	9606.ENSP00000309572	0	0	0	0	0.063	0.095	0	0.585	0.618
PRKDC	PTEN	9606.ENSP00000313420	9606.ENSP00000361021	0	0	0	0	0.056	0.103	0	0.422	0.468
PRKDC	XPO1	9606.ENSP00000313420	9606.ENSP00000384863	0	0	0	0	0.146	0.067	0	0.431	0.507
PRKDC	TBK1	9606.ENSP00000313420	9606.ENSP00000329967	0	0	0	0	0.055	0.073	0.4	0.284	0.573
PRKDC	TOP2A	9606.ENSP00000313420	9606.ENSP00000411532	0	0	0	0	0.162	0.434	0	0.599	0.793
PRKDC	RAD51	9606.ENSP00000313420	9606.ENSP00000493712	0	0	0	0	0.098	0.065	0	0.807	0.823
PRKN	PSMA2	9606.ENSP00000355865	9606.ENSP00000223321	0	0	0	0	0	0.409	0.65	0.09	0.795
PRKN	PSMA5	9606.ENSP00000355865	9606.ENSP00000271308	0	0	0	0	0	0.421	0.65	0.053	0.791
PRKN	RPTOR	9606.ENSP00000355865	9606.ENSP00000307272	0	0	0	0	0	0.292	0	0.303	0.486
PRKN	PSEN1	9606.ENSP00000355865	9606.ENSP00000326366	0	0	0	0	0	0	0	0.759	0.759
PRKN	TBK1	9606.ENSP00000355865	9606.ENSP00000329967	0	0	0	0	0	0.335	0	0.49	0.647
PRKN	UBE2V1	9606.ENSP00000355865	9606.ENSP00000340305	0	0	0	0	0	0.748	0.5	0.257	0.898
PRKN	VCP	9606.ENSP00000355865	9606.ENSP00000351777	0	0	0	0	0	0.753	0.5	0.463	0.928
PRKN	PTEN	9606.ENSP00000355865	9606.ENSP00000361021	0	0	0	0	0	0.086	0	0.623	0.641
PRKN	SUMO1	9606.ENSP00000355865	9606.ENSP00000376077	0	0	0	0	0	0.292	0	0.671	0.757
PRMT6	SUV39H1	9606.ENSP00000359095	9606.ENSP00000337976	0	0	0	0	0.076	0.064	0	0.467	0.5
PSEN1	TERT	9606.ENSP00000326366	9606.ENSP00000309572	0	0	0	0	0.068	0	0	0.404	0.421
PSEN1	TOP2A	9606.ENSP00000326366	9606.ENSP00000411532	0	0	0	0	0.047	0	0	0.397	0.4
PSEN1	TGFBR1	9606.ENSP00000326366	9606.ENSP00000447297	0	0	0	0	0.11	0.297	0	0.165	0.433
PSEN1	TRPM7	9606.ENSP00000326366	9606.ENSP00000495860	0	0	0	0	0.049	0	0	0.436	0.44
PSEN1	SUMO1	9606.ENSP00000326366	9606.ENSP00000376077	0	0	0	0	0.08	0	0	0.417	0.441
PSEN1	VCP	9606.ENSP00000326366	9606.ENSP00000351777	0	0	0	0	0.055	0	0	0.481	0.489
PSMA2	RBX1	9606.ENSP00000223321	9606.ENSP00000216225	0	0	0	0	0.399	0.409	0.5	0	0.806
PSMA2	TP73	9606.ENSP00000223321	9606.ENSP00000367545	0	0	0	0	0	0	0.4	0	0.4
PSMA2	PTEN	9606.ENSP00000223321	9606.ENSP00000361021	0	0	0	0	0.044	0	0.4	0	0.401
PSMA2	XPO1	9606.ENSP00000223321	9606.ENSP00000384863	0	0	0	0	0.328	0	0	0.15	0.404
PSMA2	UBE2C	9606.ENSP00000223321	9606.ENSP00000348838	0	0	0	0	0.108	0	0.4	0.119	0.487
PSMA2	SUMO1	9606.ENSP00000223321	9606.ENSP00000376077	0	0	0	0	0.608	0	0	0	0.608
PSMA2	VCP	9606.ENSP00000223321	9606.ENSP00000351777	0	0	0	0	0.146	0.648	0.5	0.172	0.859
PSMA2	PSMA5	9606.ENSP00000223321	9606.ENSP00000271308	0	0	0.067	0.832	0.961	0.999	0.9	0.752	0.999
PSMA5	RBX1	9606.ENSP00000271308	9606.ENSP00000216225	0	0	0	0	0.31	0	0.5	0.078	0.654
PSMA5	TP73	9606.ENSP00000271308	9606.ENSP00000367545	0	0	0	0	0	0	0.4	0	0.4
PSMA5	PTEN	9606.ENSP00000271308	9606.ENSP00000361021	0	0	0	0	0.042	0.05	0.4	0.066	0.422
PSMA5	UBE2C	9606.ENSP00000271308	9606.ENSP00000348838	0	0	0	0	0.078	0.234	0.4	0.147	0.59
PSMA5	SUMO1	9606.ENSP00000271308	9606.ENSP00000376077	0	0	0	0	0.624	0.096	0	0.056	0.651
PSMA5	VCP	9606.ENSP00000271308	9606.ENSP00000351777	0	0	0	0	0.138	0.206	0.5	0.239	0.705
PTEN	RPTOR	9606.ENSP00000361021	9606.ENSP00000307272	0	0	0	0	0.083	0.073	0	0.724	0.744
PTEN	TERT	9606.ENSP00000361021	9606.ENSP00000309572	0	0	0	0	0.111	0	0	0.808	0.822
PTEN	STK11	9606.ENSP00000361021	9606.ENSP00000324856	0	0	0	0	0	0.331	0	0.971	0.979
PTEN	TBK1	9606.ENSP00000361021	9606.ENSP00000329967	0	0	0	0	0.104	0.092	0	0.325	0.403
PTEN	STAT1	9606.ENSP00000361021	9606.ENSP00000354394	0	0	0	0	0.08	0	0	0.521	0.541
PTEN	XIAP	9606.ENSP00000361021	9606.ENSP00000360242	0	0	0	0	0.103	0.534	0.4	0.723	0.921
PTEN	TP73	9606.ENSP00000361021	9606.ENSP00000367545	0	0	0	0	0.082	0.048	0	0.429	0.457
PTEN	TGFBR1	9606.ENSP00000361021	9606.ENSP00000447297	0	0	0	0	0.049	0.092	0	0.454	0.487
PTEN	SUMO1	9606.ENSP00000361021	9606.ENSP00000376077	0	0	0	0	0.08	0	0	0.586	0.603
PTEN	TOP2A	9606.ENSP00000361021	9606.ENSP00000411532	0	0	0	0	0.078	0	0	0.621	0.636
PTEN	RAD51	9606.ENSP00000361021	9606.ENSP00000493712	0	0	0	0	0	0.516	0	0.522	0.759
RAD51	TOPBP1	9606.ENSP00000493712	9606.ENSP00000260810	0	0	0	0	0.202	0.226	0.5	0.694	0.893
RAD51	TPX2	9606.ENSP00000493712	9606.ENSP00000300403	0	0	0	0	0.479	0	0	0.473	0.714
RAD51	TERT	9606.ENSP00000493712	9606.ENSP00000309572	0	0	0.24	0	0.084	0.088	0	0.502	0.642
RAD51	TYMS	9606.ENSP00000493712	9606.ENSP00000315644	0.057	0	0	0	0.572	0	0	0.437	0.753
RAD51	UBE2C	9606.ENSP00000493712	9606.ENSP00000348838	0	0	0	0	0.566	0.114	0.72	0.215	0.904
RAD51	VCP	9606.ENSP00000493712	9606.ENSP00000351777	0.041	0	0	0	0.042	0.11	0	0.608	0.637
RAD51	TTK	9606.ENSP00000493712	9606.ENSP00000358813	0	0	0	0	0.598	0	0	0.447	0.768
RAD51	SUMO1	9606.ENSP00000493712	9606.ENSP00000376077	0	0	0	0	0.075	0.738	0	0.894	0.972
RAD51	XPO1	9606.ENSP00000493712	9606.ENSP00000384863	0	0	0	0	0.086	0.292	0	0.245	0.468
RAD51	TOP2A	9606.ENSP00000493712	9606.ENSP00000411532	0	0	0	0	0.402	0.069	0	0.669	0.799
RBP2	TGFBI	9606.ENSP00000232217	9606.ENSP00000416330	0	0	0	0	0	0	0	0.423	0.422
RBX1	TOPBP1	9606.ENSP00000216225	9606.ENSP00000260810	0	0	0	0	0.056	0	0	0.445	0.454
RBX1	UBE2C	9606.ENSP00000216225	9606.ENSP00000348838	0	0	0	0	0.064	0.211	0	0.392	0.511
RBX1	STAT1	9606.ENSP00000216225	9606.ENSP00000354394	0	0	0	0	0.119	0	0.5	0.181	0.607
RBX1	VCP	9606.ENSP00000216225	9606.ENSP00000351777	0	0	0	0	0.122	0.097	0.5	0.31	0.69
RBX1	SUMO1	9606.ENSP00000216225	9606.ENSP00000376077	0	0	0	0	0.423	0	0.5	0.446	0.826
RPTOR	TBK1	9606.ENSP00000307272	9606.ENSP00000329967	0	0	0	0	0.049	0.502	0	0.277	0.628
RPTOR	STK11	9606.ENSP00000307272	9606.ENSP00000324856	0	0	0	0	0.085	0.125	0	0.755	0.787
SENP1	USP28	9606.ENSP00000394791	9606.ENSP00000003302	0	0	0	0	0.119	0.292	0	0.242	0.487
SENP1	SUMO1	9606.ENSP00000394791	9606.ENSP00000376077	0	0	0	0	0.055	0.987	0.4	0.974	0.999
STAT1	TBP	9606.ENSP00000354394	9606.ENSP00000230354	0	0	0	0	0.049	0.095	0	0.367	0.407
STAT1	TLR8	9606.ENSP00000354394	9606.ENSP00000312082	0	0	0	0	0.144	0.064	0	0.533	0.593
STAT1	TBK1	9606.ENSP00000354394	9606.ENSP00000329967	0	0	0	0	0.166	0.096	0	0.692	0.748
STAT1	XIAP	9606.ENSP00000354394	9606.ENSP00000360242	0	0	0	0	0.057	0.066	0	0.391	0.418
STAT1	SUMO1	9606.ENSP00000354394	9606.ENSP00000376077	0	0	0	0	0.042	0	0.5	0.399	0.687
STK11	TERT	9606.ENSP00000324856	9606.ENSP00000309572	0	0	0	0	0.042	0.186	0	0.431	0.517
SUMO1	TBK1	9606.ENSP00000376077	9606.ENSP00000329967	0	0	0	0	0.056	0.326	0	0.234	0.471
SUMO1	VCP	9606.ENSP00000376077	9606.ENSP00000351777	0	0	0	0	0.115	0.222	0	0.37	0.529
SUMO1	TOP2A	9606.ENSP00000376077	9606.ENSP00000411532	0	0	0	0	0.059	0.131	0.4	0.407	0.67
SUMO1	XPO1	9606.ENSP00000376077	9606.ENSP00000384863	0	0	0	0	0.203	0.441	0	0.398	0.708
SUV39H1	TRDMT1	9606.ENSP00000337976	9606.ENSP00000367030	0	0	0	0	0.111	0	0	0.357	0.404
TAGLN	TGFB2	9606.ENSP00000376678	9606.ENSP00000355896	0	0	0	0	0.095	0	0	0.38	0.415
TAGLN	TGFBI	9606.ENSP00000376678	9606.ENSP00000416330	0	0	0	0	0.174	0	0	0.308	0.403
TAGLN	TGFBR1	9606.ENSP00000376678	9606.ENSP00000447297	0	0	0	0	0.047	0.114	0	0.391	0.441
TBK1	TLR10	9606.ENSP00000329967	9606.ENSP00000308925	0	0	0	0	0.067	0.1	0	0.351	0.407
TBK1	TLR8	9606.ENSP00000329967	9606.ENSP00000312082	0	0	0	0	0.118	0.1	0	0.606	0.66
TBK1	VCP	9606.ENSP00000329967	9606.ENSP00000351777	0	0	0	0	0.072	0.096	0	0.663	0.692
TBK1	XIAP	9606.ENSP00000329967	9606.ENSP00000360242	0	0	0	0	0.049	0.563	0.5	0.252	0.823
TBP	YEATS4	9606.ENSP00000230354	9606.ENSP00000247843	0	0	0	0	0.06	0.304	0	0.309	0.508
TBP	TBPL1	9606.ENSP00000230354	9606.ENSP00000237264	0	0	0.092	0.884	0.134	0.277	0.9	0.129	0.941
TBPL1	YEATS4	9606.ENSP00000237264	9606.ENSP00000247843	0	0	0	0	0.101	0.304	0	0.12	0.401
TERT	XIAP	9606.ENSP00000309572	9606.ENSP00000360242	0	0	0	0	0	0	0	0.472	0.472
TGFB2	TGFBI	9606.ENSP00000355896	9606.ENSP00000416330	0	0	0	0	0.112	0	0	0.432	0.474
TGFB2	TGFBR1	9606.ENSP00000355896	9606.ENSP00000447297	0	0	0	0	0	0.35	0	0.997	0.998
TGFBI	TGFBR1	9606.ENSP00000416330	9606.ENSP00000447297	0	0	0	0	0	0.051	0	0.436	0.442
TGFBR1	XIAP	9606.ENSP00000447297	9606.ENSP00000360242	0	0	0	0	0.11	0.099	0	0.825	0.847
TGFBR1	XPO1	9606.ENSP00000447297	9606.ENSP00000384863	0	0	0	0	0.069	0.052	0.5	0.151	0.575
TLR10	TLR8	9606.ENSP00000308925	9606.ENSP00000312082	0	0	0	0.583	0.131	0.058	0	0.407	0.473
TOP2A	TOPBP1	9606.ENSP00000411532	9606.ENSP00000260810	0	0	0	0	0.235	0.092	0	0.734	0.799
TOP2A	TPX2	9606.ENSP00000411532	9606.ENSP00000300403	0	0	0	0	0.854	0	0	0.623	0.942
TOP2A	TYMS	9606.ENSP00000411532	9606.ENSP00000315644	0.12	0	0	0	0.78	0	0	0.813	0.96
TOP2A	UBE2C	9606.ENSP00000411532	9606.ENSP00000348838	0	0	0	0	0.842	0.068	0	0.837	0.973
TOP2A	TTK	9606.ENSP00000411532	9606.ENSP00000358813	0	0	0	0	0.858	0	0	0.719	0.958
TOP2A	TRDMT1	9606.ENSP00000411532	9606.ENSP00000367030	0.12	0	0	0	0.042	0	0	0.478	0.521
TOP2A	XPO1	9606.ENSP00000411532	9606.ENSP00000384863	0	0	0	0	0.224	0.292	0	0.272	0.565
TPX2	TYMS	9606.ENSP00000300403	9606.ENSP00000315644	0	0	0	0	0.532	0	0	0.324	0.67
TPX2	TTK	9606.ENSP00000300403	9606.ENSP00000358813	0	0	0	0	0.848	0	0	0.592	0.935
TPX2	UBE2C	9606.ENSP00000300403	9606.ENSP00000348838	0	0	0	0	0.866	0.042	0	0.751	0.965
TTK	TYMS	9606.ENSP00000358813	9606.ENSP00000315644	0	0	0	0	0.51	0	0	0.354	0.67
TTK	UBE2C	9606.ENSP00000358813	9606.ENSP00000348838	0	0	0	0	0.83	0	0	0.497	0.911
TYMS	UBE2C	9606.ENSP00000315644	9606.ENSP00000348838	0	0	0	0	0.481	0.324	0	0.629	0.858
UBE2C	UBE2V1	9606.ENSP00000348838	9606.ENSP00000340305	0	0	0	0	0.07	0.568	0	0.367	0.724
UBE2V1	XIAP	9606.ENSP00000340305	9606.ENSP00000360242	0	0	0	0	0	0.302	0	0.211	0.426
UBE2V1	VCP	9606.ENSP00000340305	9606.ENSP00000351777	0	0	0	0	0.133	0.127	0.5	0.265	0.684
XPO1	ZNF207	9606.ENSP00000384863	9606.ENSP00000378165	0	0	0	0	0.307	0	0	0.184	0.411

## Sheet: Table S3
Table S3. GO enrichment analysis of ARDEGs
Category	Term	RT	Genes	Count	%	P-Value	Fold Enrichment	Benjamini
GOTERM_BP_DIRECT	protein phosphorylation	RT		19	14.2	1.5e-09	6.2	2.7e-06
GOTERM_BP_DIRECT	cellular response to DNA damage stimulus	RT		15	11.2	1.7e-08	7.3	1.6e-05
GOTERM_BP_DIRECT	negative regulation of apoptotic process	RT		18	13.4	1.8e-07	4.8	0.00011
GOTERM_BP_DIRECT	peptidyl-threonine phosphorylation	RT		8	6	6e-07	16.1	0.00028
GOTERM_BP_DIRECT	positive regulation of transcription from RNA polymerase II promoter	RT		25	18.7	2.9e-06	2.9	0.001
GOTERM_BP_DIRECT	negative regulation of innate immune response	RT		6	4.5	3.3e-06	25.6	0.001
GOTERM_BP_DIRECT	peptidyl-serine phosphorylation	RT		10	7.5	4.9e-06	7.9	0.0013
GOTERM_BP_DIRECT	negative regulation of gene expression	RT		12	9	1.2e-05	5.5	0.0029
GOTERM_BP_DIRECT	regulation of cell cycle	RT		11	8.2	1.6e-05	6	0.0033
GOTERM_BP_DIRECT	response to xenobiotic stimulus	RT		11	8.2	2.1e-05	5.8	0.0038
GOTERM_BP_DIRECT	positive regulation of proteasomal ubiquitin-dependent protein catabolic process	RT		7	5.2	2.2e-05	12.2	0.0038
GOTERM_BP_DIRECT	positive regulation of protein phosphorylation	RT		10	7.5	2.6e-05	6.4	0.004
GOTERM_BP_DIRECT	positive regulation of interferon-alpha production	RT		5	3.7	2.8e-05	27.9	0.004
GOTERM_BP_DIRECT	regulation of protein stability	RT		7	5.2	4.8e-05	10.7	0.0064
GOTERM_BP_DIRECT	mitotic spindle assembly checkpoint	RT		5	3.7	6.5e-05	22.7	0.0076
GOTERM_BP_DIRECT	regulation of chromosome segregation	RT		4	3	6.6e-05	48.4	0.0076
GOTERM_BP_DIRECT	regulation of signal transduction by p53 class mediator	RT		5	3.7	0.00019	17.3	0.021
GOTERM_BP_DIRECT	inflammatory response	RT		12	9	0.0002	4	0.021
GOTERM_BP_DIRECT	positive regulation of gene expression	RT		13	9.7	0.00023	3.6	0.023
GOTERM_BP_DIRECT	regulation of apoptotic process	RT		9	6.7	0.00029	5.3	0.027
GOTERM_BP_DIRECT	cellular response to hypoxia	RT		7	5.2	0.00032	7.6	0.028
GOTERM_BP_DIRECT	apoptotic process	RT		14	10.4	0.00033	3.3	0.028
GOTERM_BP_DIRECT	mRNA transcription from RNA polymerase II promoter	RT		5	3.7	0.00038	14.5	0.029
GOTERM_BP_DIRECT	response to activity	RT		5	3.7	0.00038	14.5	0.029
GOTERM_BP_DIRECT	positive regulation of lipid biosynthetic process	RT		4	3	0.0005	25.3	0.037
GOTERM_BP_DIRECT	response to glucocorticoid	RT		5	3.7	0.00076	12.1	0.054
GOTERM_BP_DIRECT	cellular response to UV	RT		5	3.7	0.0008	11.9	0.055
GOTERM_BP_DIRECT	phosphorylation	RT		9	6.7	0.00089	4.5	0.059
GOTERM_BP_DIRECT	protein stabilization	RT		8	6	0.001	5.1	0.065
GOTERM_BP_DIRECT	DNA repair	RT		9	6.7	0.0011	4.3	0.069
GOTERM_BP_DIRECT	negative regulation of canonical Wnt signaling pathway	RT		7	5.2	0.0012	5.9	0.069
GOTERM_BP_DIRECT	ventricular cardiac muscle cell development	RT		3	2.2	0.0013	54.5	0.071
GOTERM_BP_DIRECT	cellular response to hydrogen peroxide	RT		5	3.7	0.0013	10.5	0.071
GOTERM_BP_DIRECT	positive regulation of sequence-specific DNA binding transcription factor activity	RT		6	4.5	0.0013	7.4	0.071
GOTERM_BP_DIRECT	cell division	RT		10	7.5	0.0014	3.7	0.074
GOTERM_BP_DIRECT	positive regulation of transcription, DNA-templated	RT		14	10.4	0.0015	2.8	0.074
GOTERM_BP_DIRECT	cell proliferation	RT		7	5.2	0.0015	5.6	0.074
GOTERM_BP_DIRECT	protein autophosphorylation	RT		7	5.2	0.0016	5.6	0.074
GOTERM_BP_DIRECT	regulation of hematopoietic stem cell differentiation	RT		4	3	0.0016	17.1	0.074
GOTERM_BP_DIRECT	DNA biosynthetic process	RT		4	3	0.0016	17.1	0.074
GOTERM_BP_DIRECT	positive regulation of erythrocyte differentiation	RT		4	3	0.0017	16.6	0.079
GOTERM_BP_DIRECT	post-translational protein modification	RT		5	3.7	0.0018	9.6	0.081
GOTERM_BP_DIRECT	activation of protein kinase activity	RT		4	3	0.0019	16.1	0.082
GOTERM_BP_DIRECT	positive regulation of endothelial cell proliferation	RT		5	3.7	0.002	9.3	0.085
GOTERM_BP_DIRECT	tumor necrosis factor-mediated signaling pathway	RT		5	3.7	0.0021	9.2	0.087
GOTERM_BP_DIRECT	rhythmic process	RT		5	3.7	0.0022	9.1	0.087
GOTERM_BP_DIRECT	proteasomal protein catabolic process	RT		4	3	0.0022	15.3	0.087
GOTERM_BP_DIRECT	regulation of cell growth	RT		5	3.7	0.0024	8.9	0.093
GOTERM_BP_DIRECT	mitotic spindle assembly	RT		4	3	0.0028	14.2	0.1
GOTERM_BP_DIRECT	positive regulation of I-kappaB kinase/NF-kappaB signaling	RT		7	5.2	0.0029	5	0.1
GOTERM_BP_DIRECT	negative regulation of macrophage cytokine production	RT		3	2.2	0.0029	36.3	0.1
GOTERM_BP_DIRECT	protein localization to kinetochore	RT		3	2.2	0.0029	36.3	0.1
GOTERM_BP_DIRECT	cell migration	RT		8	6	0.003	4.2	0.11
GOTERM_BP_DIRECT	positive regulation of interferon-beta production	RT		4	3	0.0032	13.5	0.11
GOTERM_BP_DIRECT	aging	RT		6	4.5	0.0034	5.9	0.11
GOTERM_BP_DIRECT	positive regulation of peptidyl-serine phosphorylation	RT		5	3.7	0.0038	7.8	0.13
GOTERM_BP_DIRECT	negative regulation of transcription from RNA polymerase II promoter	RT		16	11.9	0.004	2.3	0.13
GOTERM_BP_DIRECT	ventricular trabecula myocardium morphogenesis	RT		3	2.2	0.004	31.1	0.13
GOTERM_BP_DIRECT	heart development	RT		7	5.2	0.0042	4.6	0.13
GOTERM_BP_DIRECT	positive regulation of cell proliferation	RT		11	8.2	0.0043	2.9	0.13
GOTERM_BP_DIRECT	intracellular signal transduction	RT		10	7.5	0.0045	3.1	0.14
GOTERM_BP_DIRECT	cellular response to organic cyclic compound	RT		4	3	0.0046	11.9	0.14
GOTERM_BP_DIRECT	striated muscle cell differentiation	RT		3	2.2	0.0052	27.2	0.15
GOTERM_BP_DIRECT	positive regulation of NF-kappaB transcription factor activity	RT		6	4.5	0.0054	5.3	0.16
GOTERM_BP_DIRECT	positive regulation of interleukin-6 production	RT		5	3.7	0.0059	6.9	0.17
GOTERM_BP_DIRECT	cellular response to insulin stimulus	RT		5	3.7	0.0061	6.9	0.17
GOTERM_BP_DIRECT	protein import into nucleus	RT		5	3.7	0.0061	6.9	0.17
GOTERM_BP_DIRECT	positive regulation of tumor necrosis factor production	RT		5	3.7	0.0065	6.7	0.18
GOTERM_BP_DIRECT	positive regulation of MAPK cascade	RT		6	4.5	0.0066	5.1	0.18
GOTERM_BP_DIRECT	NIK/NF-kappaB signaling	RT		4	3	0.0066	10.4	0.18
GOTERM_BP_DIRECT	chromatin organization	RT		8	6	0.0068	3.6	0.18
GOTERM_BP_DIRECT	response to virus	RT		5	3.7	0.0069	6.6	0.18
GOTERM_BP_DIRECT	positive regulation of stress-activated MAPK cascade	RT		3	2.2	0.0073	22.9	0.18
GOTERM_BP_DIRECT	spindle organization	RT		3	2.2	0.0073	22.9	0.18
GOTERM_BP_DIRECT	monocyte differentiation	RT		3	2.2	0.0073	22.9	0.18
GOTERM_BP_DIRECT	positive regulation of smooth muscle cell proliferation	RT		4	3	0.0077	9.8	0.19
GOTERM_BP_DIRECT	angiogenesis	RT		7	5.2	0.0082	4	0.2
GOTERM_BP_DIRECT	response to nutrient	RT		4	3	0.0088	9.4	0.21
GOTERM_BP_DIRECT	cellular response to glucose starvation	RT		4	3	0.0088	9.4	0.21
GOTERM_BP_DIRECT	negative regulation of release of cytochrome c from mitochondria	RT		3	2.2	0.0089	20.7	0.21
GOTERM_BP_DIRECT	I-kappaB kinase/NF-kappaB signaling	RT		4	3	0.0096	9.1	0.22
GOTERM_BP_DIRECT	regulation of mRNA stability	RT		4	3	0.01	8.9	0.22
GOTERM_BP_DIRECT	regulation of circadian rhythm	RT		4	3	0.01	8.9	0.22
GOTERM_BP_DIRECT	glucose homeostasis	RT		5	3.7	0.01	5.9	0.22
GOTERM_BP_DIRECT	regulation of neuron death	RT		3	2.2	0.011	18.9	0.23
GOTERM_BP_DIRECT	response to oxidative stress	RT		5	3.7	0.011	5.8	0.23
GOTERM_BP_DIRECT	positive regulation of glycolytic process	RT		3	2.2	0.012	18.2	0.25
GOTERM_BP_DIRECT	platelet activation	RT		4	3	0.012	8.4	0.25
GOTERM_BP_DIRECT	innate immune response	RT		11	8.2	0.012	2.5	0.25
GOTERM_BP_DIRECT	protein deubiquitination	RT		5	3.7	0.012	5.6	0.25
GOTERM_BP_DIRECT	response to cadmium ion	RT		3	2.2	0.013	17.4	0.25
GOTERM_BP_DIRECT	protein tetramerization	RT		3	2.2	0.013	17.4	0.25
GOTERM_BP_DIRECT	artery morphogenesis	RT		3	2.2	0.013	17.4	0.25
GOTERM_BP_DIRECT	positive regulation of nitric-oxide synthase activity	RT		3	2.2	0.013	17.4	0.25
GOTERM_BP_DIRECT	macroautophagy	RT		4	3	0.013	8.2	0.25
GOTERM_BP_DIRECT	positive regulation of canonical Wnt signaling pathway	RT		5	3.7	0.013	5.5	0.25
GOTERM_BP_DIRECT	regulation of protein kinase B signaling	RT		3	2.2	0.014	16.8	0.25
GOTERM_BP_DIRECT	negative regulation of endoplasmic reticulum stress-induced neuron intrinsic apoptotic signaling pathway	RT		2	1.5	0.014	145.2	0.25
GOTERM_BP_DIRECT	positive regulation of protein linear polyubiquitination	RT		2	1.5	0.014	145.2	0.25
GOTERM_BP_DIRECT	protein polyubiquitination	RT		6	4.5	0.014	4.2	0.25
GOTERM_BP_DIRECT	negative regulation of cell proliferation	RT		9	6.7	0.014	2.8	0.26
GOTERM_BP_DIRECT	intrinsic apoptotic signaling pathway by p53 class mediator	RT		3	2.2	0.015	16.1	0.26
GOTERM_BP_DIRECT	negative regulation of protein binding	RT		4	3	0.015	7.7	0.27
GOTERM_BP_DIRECT	toll-like receptor signaling pathway	RT		3	2.2	0.016	15.6	0.27
GOTERM_BP_DIRECT	negative regulation of cellular senescence	RT		3	2.2	0.016	15.6	0.27
GOTERM_BP_DIRECT	positive regulation of DNA replication	RT		3	2.2	0.016	15.6	0.27
GOTERM_BP_DIRECT	T cell receptor signaling pathway	RT		5	3.7	0.016	5.1	0.28
GOTERM_BP_DIRECT	signal transduction	RT		17	12.7	0.017	1.9	0.29
GOTERM_BP_DIRECT	hematopoietic progenitor cell differentiation	RT		4	3	0.017	7.3	0.3
GOTERM_BP_DIRECT	response to toxic substance	RT		4	3	0.018	7.2	0.3
GOTERM_BP_DIRECT	proteasome-mediated ubiquitin-dependent protein catabolic process	RT		6	4.5	0.019	3.9	0.32
GOTERM_BP_DIRECT	negative regulation of DNA binding	RT		3	2.2	0.02	13.6	0.33
GOTERM_BP_DIRECT	neuron cellular homeostasis	RT		3	2.2	0.02	13.6	0.33
GOTERM_BP_DIRECT	positive regulation of innate immune response	RT		3	2.2	0.02	13.6	0.33
GOTERM_BP_DIRECT	positive regulation of viral translation	RT		2	1.5	0.02	96.8	0.33
GOTERM_BP_DIRECT	protein localization to nuclear pore	RT		2	1.5	0.02	96.8	0.33
GOTERM_BP_DIRECT	negative regulation of protein phosphorylation	RT		4	3	0.021	6.8	0.33
GOTERM_BP_DIRECT	positive regulation of translation	RT		4	3	0.021	6.8	0.33
GOTERM_BP_DIRECT	protein export from nucleus	RT		3	2.2	0.021	13.2	0.33
GOTERM_BP_DIRECT	intrinsic apoptotic signaling pathway in response to DNA damage by p53 class mediator	RT		3	2.2	0.021	13.2	0.33
GOTERM_BP_DIRECT	positive regulation of type I interferon production	RT		3	2.2	0.023	12.8	0.35
GOTERM_BP_DIRECT	regulation of transcription, DNA-templated	RT		14	10.4	0.023	2	0.35
GOTERM_BP_DIRECT	defense response to virus	RT		6	4.5	0.023	3.7	0.35
GOTERM_BP_DIRECT	autophagy	RT		5	3.7	0.023	4.6	0.35
GOTERM_BP_DIRECT	positive regulation of apoptotic signaling pathway	RT		3	2.2	0.025	12.1	0.36
GOTERM_BP_DIRECT	cellular response to cadmium ion	RT		3	2.2	0.025	12.1	0.36
GOTERM_BP_DIRECT	liver regeneration	RT		3	2.2	0.025	12.1	0.36
GOTERM_BP_DIRECT	activation of innate immune response	RT		3	2.2	0.025	12.1	0.36
GOTERM_BP_DIRECT	positive regulation of cell growth	RT		4	3	0.025	6.3	0.36
GOTERM_BP_DIRECT	negative regulation of neuron apoptotic process	RT		5	3.7	0.026	4.5	0.37
GOTERM_BP_DIRECT	mRNA transport	RT		4	3	0.026	6.2	0.37
GOTERM_BP_DIRECT	positive regulation of glucose import	RT		3	2.2	0.026	11.8	0.37
GOTERM_BP_DIRECT	negative regulation of extrinsic apoptotic signaling pathway in absence of ligand	RT		3	2.2	0.026	11.8	0.37
GOTERM_BP_DIRECT	negative regulation of translation	RT		4	3	0.027	6.2	0.37
GOTERM_BP_DIRECT	dTTP biosynthetic process	RT		2	1.5	0.027	72.6	0.37
GOTERM_BP_DIRECT	replication fork processing	RT		3	2.2	0.028	11.5	0.38
GOTERM_BP_DIRECT	response to axon injury	RT		3	2.2	0.028	11.5	0.38
GOTERM_BP_DIRECT	chromatin remodeling	RT		7	5.2	0.028	3	0.38
GOTERM_BP_DIRECT	chromosome segregation	RT		4	3	0.028	6.1	0.38
GOTERM_BP_DIRECT	positive regulation of apoptotic process	RT		7	5.2	0.028	3	0.38
GOTERM_BP_DIRECT	negative regulation of endothelial cell proliferation	RT		3	2.2	0.029	11.2	0.38
GOTERM_BP_DIRECT	mitotic G2 DNA damage checkpoint	RT		3	2.2	0.029	11.2	0.38
GOTERM_BP_DIRECT	regulation of neuron projection development	RT		3	2.2	0.029	11.2	0.38
GOTERM_BP_DIRECT	animal organ regeneration	RT		3	2.2	0.031	10.9	0.39
GOTERM_BP_DIRECT	positive regulation of protein localization to nucleus	RT		3	2.2	0.031	10.9	0.39
GOTERM_BP_DIRECT	blood vessel remodeling	RT		3	2.2	0.031	10.9	0.39
GOTERM_BP_DIRECT	response to ionizing radiation	RT		3	2.2	0.032	10.6	0.4
GOTERM_BP_DIRECT	epithelial cell differentiation	RT		4	3	0.032	5.8	0.4
GOTERM_BP_DIRECT	viral entry into host cell	RT		4	3	0.034	5.6	0.41
GOTERM_BP_DIRECT	positive regulation of epithelial to mesenchymal transition involved in endocardial cushion formation	RT		2	1.5	0.034	58.1	0.41
GOTERM_BP_DIRECT	nuclear pore localization	RT		2	1.5	0.034	58.1	0.41
GOTERM_BP_DIRECT	chromosome organization involved in meiotic cell cycle	RT		2	1.5	0.034	58.1	0.41
GOTERM_BP_DIRECT	positive regulation of amyloid fibril formation	RT		2	1.5	0.034	58.1	0.41
GOTERM_BP_DIRECT	positive regulation of interleukin-10 production	RT		3	2.2	0.035	10.1	0.42
GOTERM_BP_DIRECT	protein localization to nucleus	RT		3	2.2	0.035	10.1	0.42
GOTERM_BP_DIRECT	positive regulation of protein kinase B signaling	RT		5	3.7	0.038	3.9	0.46
GOTERM_BP_DIRECT	stimulatory C-type lectin receptor signaling pathway	RT		3	2.2	0.039	9.5	0.46
GOTERM_BP_DIRECT	aggresome assembly	RT		2	1.5	0.04	48.4	0.46
GOTERM_BP_DIRECT	protein import	RT		2	1.5	0.04	48.4	0.46
GOTERM_BP_DIRECT	positive regulation of G0 to G1 transition	RT		2	1.5	0.04	48.4	0.46
GOTERM_BP_DIRECT	negative regulation of histone H3-K4 methylation	RT		2	1.5	0.04	48.4	0.46
GOTERM_BP_DIRECT	nucleosome organization	RT		2	1.5	0.04	48.4	0.46
GOTERM_BP_DIRECT	anaphase-promoting complex-dependent catabolic process	RT		3	2.2	0.041	9.3	0.46
GOTERM_BP_DIRECT	cell motility	RT		3	2.2	0.041	9.3	0.46
GOTERM_BP_DIRECT	male gonad development	RT		4	3	0.042	5.2	0.46
GOTERM_BP_DIRECT	cell cycle	RT		7	5.2	0.042	2.7	0.46
GOTERM_BP_DIRECT	integrin-mediated signaling pathway	RT		4	3	0.042	5.1	0.46
GOTERM_BP_DIRECT	protein K63-linked ubiquitination	RT		3	2.2	0.043	9.1	0.46
GOTERM_BP_DIRECT	Fc-epsilon receptor signaling pathway	RT		3	2.2	0.043	9.1	0.46
GOTERM_BP_DIRECT	cellular response to epidermal growth factor stimulus	RT		3	2.2	0.043	9.1	0.46
GOTERM_BP_DIRECT	thymus development	RT		3	2.2	0.043	9.1	0.46
GOTERM_BP_DIRECT	positive regulation of pathway-restricted SMAD protein phosphorylation	RT		3	2.2	0.044	8.9	0.48
GOTERM_BP_DIRECT	norepinephrine metabolic process	RT		2	1.5	0.047	41.5	0.49
GOTERM_BP_DIRECT	positive regulation of I-kappaB phosphorylation	RT		2	1.5	0.047	41.5	0.49
GOTERM_BP_DIRECT	free ubiquitin chain polymerization	RT		2	1.5	0.047	41.5	0.49
GOTERM_BP_DIRECT	response to fungicide	RT		2	1.5	0.047	41.5	0.49
GOTERM_BP_DIRECT	activation-induced cell death of T cells	RT		2	1.5	0.047	41.5	0.49
GOTERM_BP_DIRECT	chaperone-mediated autophagy	RT		2	1.5	0.047	41.5	0.49
GOTERM_BP_DIRECT	positive regulation of G1/S transition of mitotic cell cycle	RT		3	2.2	0.048	8.5	0.49
GOTERM_BP_DIRECT	cellular response to heat	RT		3	2.2	0.049	8.4	0.5
GOTERM_BP_DIRECT	positive regulation of TORC1 signaling	RT		3	2.2	0.049	8.4	0.5
GOTERM_BP_DIRECT	cellular response to reactive oxygen species	RT		3	2.2	0.051	8.2	0.52
GOTERM_BP_DIRECT	DNA replication	RT		4	3	0.051	4.8	0.52
GOTERM_BP_DIRECT	methylation	RT		4	3	0.053	4.7	0.54
GOTERM_BP_DIRECT	regulation of insulin-like growth factor receptor signaling pathway	RT		2	1.5	0.053	36.3	0.54
GOTERM_BP_DIRECT	positive regulation of epithelial to mesenchymal transition	RT		3	2.2	0.054	7.9	0.54
GOTERM_BP_DIRECT	protein localization	RT		4	3	0.055	4.6	0.55
GOTERM_BP_DIRECT	negative regulation of cysteine-type endopeptidase activity involved in apoptotic process	RT		3	2.2	0.056	7.8	0.55
GOTERM_BP_DIRECT	osteoblast differentiation	RT		4	3	0.058	4.5	0.56
GOTERM_BP_DIRECT	mitotic spindle organization	RT		3	2.2	0.06	7.5	0.57
GOTERM_BP_DIRECT	cerebral cortex cell migration	RT		2	1.5	0.06	32.3	0.57
GOTERM_BP_DIRECT	DNA topological change	RT		2	1.5	0.06	32.3	0.57
GOTERM_BP_DIRECT	spermatid nucleus differentiation	RT		2	1.5	0.06	32.3	0.57
GOTERM_BP_DIRECT	negative regulation of lipid biosynthetic process	RT		2	1.5	0.06	32.3	0.57
GOTERM_BP_DIRECT	negative regulation of neuron death	RT		3	2.2	0.062	7.4	0.58
GOTERM_BP_DIRECT	response to mechanical stimulus	RT		3	2.2	0.062	7.4	0.58
GOTERM_BP_DIRECT	telomere maintenance	RT		3	2.2	0.063	7.3	0.6
GOTERM_BP_DIRECT	mRNA export from nucleus	RT		3	2.2	0.065	7.1	0.61
GOTERM_BP_DIRECT	response to glucagon	RT		2	1.5	0.066	29	0.61
GOTERM_BP_DIRECT	regulation of stress-activated MAPK cascade	RT		2	1.5	0.066	29	0.61
GOTERM_BP_DIRECT	reciprocal DNA recombination	RT		2	1.5	0.066	29	0.61
GOTERM_BP_DIRECT	cellular response to tumor necrosis factor	RT		4	3	0.071	4.1	0.65
GOTERM_BP_DIRECT	protein K48-linked ubiquitination	RT		3	2.2	0.071	6.8	0.65
GOTERM_BP_DIRECT	positive regulation of ubiquitin protein ligase activity	RT		2	1.5	0.073	26.4	0.66
GOTERM_BP_DIRECT	tetrahydrofolate interconversion	RT		2	1.5	0.073	26.4	0.66
GOTERM_BP_DIRECT	negative regulation of neuron differentiation	RT		3	2.2	0.075	6.6	0.67
GOTERM_BP_DIRECT	negative regulation of epithelial cell proliferation	RT		3	2.2	0.075	6.6	0.67
GOTERM_BP_DIRECT	positive regulation of interleukin-1 beta production	RT		3	2.2	0.077	6.5	0.68
GOTERM_BP_DIRECT	mitotic cytokinesis	RT		3	2.2	0.079	6.4	0.68
GOTERM_BP_DIRECT	positive regulation of mitotic cell cycle spindle assembly checkpoint	RT		2	1.5	0.079	24.2	0.68
GOTERM_BP_DIRECT	negative regulation of axonogenesis	RT		2	1.5	0.079	24.2	0.68
GOTERM_BP_DIRECT	mesodermal cell differentiation	RT		2	1.5	0.079	24.2	0.68
GOTERM_BP_DIRECT	neuron projection maintenance	RT		2	1.5	0.079	24.2	0.68
GOTERM_BP_DIRECT	anoikis	RT		2	1.5	0.079	24.2	0.68
GOTERM_BP_DIRECT	positive regulation of mitochondrial membrane potential	RT		2	1.5	0.079	24.2	0.68
GOTERM_BP_DIRECT	amyloid precursor protein metabolic process	RT		2	1.5	0.079	24.2	0.68
GOTERM_BP_DIRECT	positive regulation of cytokine production	RT		3	2.2	0.083	6.2	0.71
GOTERM_BP_DIRECT	macromolecular complex assembly	RT		4	3	0.084	3.9	0.71
GOTERM_BP_DIRECT	circadian rhythm	RT		3	2.2	0.085	6.1	0.71
GOTERM_BP_DIRECT	negative regulation of cell death	RT		3	2.2	0.085	6.1	0.71
GOTERM_BP_DIRECT	response to growth hormone	RT		2	1.5	0.085	22.3	0.71
GOTERM_BP_DIRECT	negative regulation of long-term synaptic potentiation	RT		2	1.5	0.085	22.3	0.71
GOTERM_BP_DIRECT	skin morphogenesis	RT		2	1.5	0.085	22.3	0.71
GOTERM_BP_DIRECT	positive regulation of kinase activity	RT		3	2.2	0.087	6.1	0.72
GOTERM_BP_DIRECT	post-embryonic development	RT		3	2.2	0.087	6.1	0.72
GOTERM_BP_DIRECT	apoptotic signaling pathway	RT		3	2.2	0.089	6	0.72
GOTERM_BP_DIRECT	mitotic cell cycle	RT		4	3	0.09	3.7	0.72
GOTERM_BP_DIRECT	positive regulation of protein binding	RT		3	2.2	0.091	5.9	0.72
GOTERM_BP_DIRECT	SCF-dependent proteasomal ubiquitin-dependent protein catabolic process	RT		3	2.2	0.091	5.9	0.72
GOTERM_BP_DIRECT	response to copper ion	RT		2	1.5	0.092	20.7	0.72
GOTERM_BP_DIRECT	translesion synthesis	RT		2	1.5	0.092	20.7	0.72
GOTERM_BP_DIRECT	positive regulation of gene silencing by miRNA	RT		2	1.5	0.092	20.7	0.72
GOTERM_BP_DIRECT	cellular response to hydroxyurea	RT		2	1.5	0.092	20.7	0.72
GOTERM_BP_DIRECT	amyloid precursor protein catabolic process	RT		2	1.5	0.092	20.7	0.72
GOTERM_BP_DIRECT	cardiac epithelial to mesenchymal transition	RT		2	1.5	0.092	20.7	0.72
GOTERM_BP_DIRECT	regulation of DNA-dependent DNA replication initiation	RT		2	1.5	0.092	20.7	0.72
GOTERM_BP_DIRECT	MAPK cascade	RT		4	3	0.093	3.7	0.72
GOTERM_BP_DIRECT	double-strand break repair	RT		3	2.2	0.093	5.8	0.72
GOTERM_BP_DIRECT	response to wounding	RT		3	2.2	0.095	5.7	0.72
GOTERM_BP_DIRECT	regulation of autophagy	RT		3	2.2	0.095	5.7	0.72
GOTERM_BP_DIRECT	cytokine-mediated signaling pathway	RT		4	3	0.097	3.6	0.72
GOTERM_BP_DIRECT	positive regulation of MAP kinase activity	RT		3	2.2	0.097	5.7	0.72
GOTERM_BP_DIRECT	positive regulation of glycogen biosynthetic process	RT		2	1.5	0.098	19.4	0.72
GOTERM_BP_DIRECT	startle response	RT		2	1.5	0.098	19.4	0.72
GOTERM_BP_DIRECT	response to reactive oxygen species	RT		2	1.5	0.098	19.4	0.72
GOTERM_BP_DIRECT	negative regulation of interferon-beta production	RT		2	1.5	0.098	19.4	0.72
GOTERM_BP_DIRECT	motor neuron apoptotic process	RT		2	1.5	0.098	19.4	0.72
GOTERM_BP_DIRECT	pathway-restricted SMAD protein phosphorylation	RT		2	1.5	0.098	19.4	0.72
GOTERM_BP_DIRECT	wound healing, spreading of cells	RT		2	1.5	0.098	19.4	0.72
GOTERM_BP_DIRECT	base-excision repair, gap-filling	RT		2	1.5	0.098	19.4	0.72
GOTERM_BP_DIRECT	cellular response to thyroid hormone stimulus	RT		2	1.5	0.098	19.4	0.72
GOTERM_CC_DIRECT	nucleoplasm	RT		68	50.7	1.4e-15	2.6	5e-13
GOTERM_CC_DIRECT	nucleus	RT		79	59	1.6e-12	2	2.7e-10
GOTERM_CC_DIRECT	cytosol	RT		69	51.5	2.7e-09	1.9	3.2e-07
GOTERM_CC_DIRECT	macromolecular complex	RT		21	15.7	2.1e-08	4.6	1.9e-06
GOTERM_CC_DIRECT	PML body	RT		8	6	6.8e-06	11.3	0.00048
GOTERM_CC_DIRECT	male germ cell nucleus	RT		6	4.5	2.2e-05	17.6	0.0013
GOTERM_CC_DIRECT	cytoplasm	RT		60	44.8	3.1e-05	1.6	0.0016
GOTERM_CC_DIRECT	nuclear body	RT		11	8.2	0.00011	4.8	0.0047
GOTERM_CC_DIRECT	chromosome, telomeric region	RT		8	6	0.00013	7.1	0.0053
GOTERM_CC_DIRECT	nuclear membrane	RT		9	6.7	0.00029	5.3	0.01
GOTERM_CC_DIRECT	perinuclear region of cytoplasm	RT		15	11.2	0.00034	3.1	0.011
GOTERM_CC_DIRECT	extracellular exosome	RT		29	21.6	0.00037	2	0.011
GOTERM_CC_DIRECT	spindle	RT		7	5.2	0.00039	7.3	0.011
GOTERM_CC_DIRECT	kinetochore	RT		7	5.2	0.00061	6.7	0.015
GOTERM_CC_DIRECT	nucleolus	RT		21	15.7	0.00069	2.3	0.016
GOTERM_CC_DIRECT	ficolin-1-rich granule lumen	RT		6	4.5	0.0013	7.5	0.028
GOTERM_CC_DIRECT	nuclear lamina	RT		3	2.2	0.0021	42.4	0.044
GOTERM_CC_DIRECT	mitotic spindle	RT		6	4.5	0.0024	6.4	0.045
GOTERM_CC_DIRECT	site of double-strand break	RT		5	3.7	0.0025	8.8	0.045
GOTERM_CC_DIRECT	spindle microtubule	RT		4	3	0.003	13.8	0.052
GOTERM_CC_DIRECT	neuronal cell body	RT		9	6.7	0.0033	3.7	0.052
GOTERM_CC_DIRECT	receptor complex	RT		7	5.2	0.0033	4.8	0.052
GOTERM_CC_DIRECT	chromatin	RT		16	11.9	0.005	2.2	0.077
GOTERM_CC_DIRECT	nuclear envelope	RT		6	4.5	0.011	4.5	0.16
GOTERM_CC_DIRECT	spindle pole	RT		5	3.7	0.012	5.6	0.17
GOTERM_CC_DIRECT	condensed chromosome	RT		3	2.2	0.016	15.5	0.21
GOTERM_CC_DIRECT	cell junction	RT		6	4.5	0.018	3.9	0.24
GOTERM_CC_DIRECT	cell surface	RT		10	7.5	0.025	2.4	0.32
GOTERM_CC_DIRECT	condensed nuclear chromosome	RT		3	2.2	0.028	11.4	0.34
GOTERM_CC_DIRECT	transcription factor TFIIA complex	RT		2	1.5	0.038	51.8	0.39
GOTERM_CC_DIRECT	nuclear stress granule	RT		2	1.5	0.038	51.8	0.39
GOTERM_CC_DIRECT	mitochondrial nucleoid	RT		3	2.2	0.038	9.7	0.39
GOTERM_CC_DIRECT	secretory granule lumen	RT		4	3	0.038	5.4	0.39
GOTERM_CC_DIRECT	microtubule cytoskeleton	RT		5	3.7	0.038	3.9	0.39
GOTERM_CC_DIRECT	ubiquitin ligase complex	RT		4	3	0.039	5.3	0.39
GOTERM_CC_DIRECT	mitochondrial matrix	RT		7	5.2	0.046	2.7	0.44
GOTERM_CC_DIRECT	intracellular organelle	RT		3	2.2	0.047	8.6	0.44
GOTERM_CC_DIRECT	nuclear chromosome	RT		3	2.2	0.048	8.5	0.45
GOTERM_CC_DIRECT	lysosome	RT		6	4.5	0.052	3	0.47
GOTERM_CC_DIRECT	proteasome complex	RT		3	2.2	0.053	8	0.47
GOTERM_CC_DIRECT	glutamatergic synapse	RT		7	5.2	0.056	2.6	0.48
GOTERM_CC_DIRECT	intracellular membrane-bounded organelle	RT		12	9	0.061	1.8	0.5
GOTERM_CC_DIRECT	membrane	RT		32	23.9	0.061	1.3	0.5
GOTERM_CC_DIRECT	transcription factor complex	RT		5	3.7	0.065	3.3	0.51
GOTERM_CC_DIRECT	nuclear speck	RT		7	5.2	0.066	2.4	0.51
GOTERM_CC_DIRECT	chromosome, centromeric region	RT		3	2.2	0.067	7.1	0.51
GOTERM_CC_DIRECT	proteasome core complex, alpha-subunit complex	RT		2	1.5	0.068	28.2	0.51
GOTERM_CC_DIRECT	peroxisomal membrane	RT		3	2.2	0.07	6.9	0.52
GOTERM_CC_DIRECT	nuclear pore nuclear basket	RT		2	1.5	0.074	25.9	0.52
GOTERM_CC_DIRECT	serine/threonine protein kinase complex	RT		2	1.5	0.074	25.9	0.52
GOTERM_CC_DIRECT	chromosome	RT		5	3.7	0.086	3	0.58
GOTERM_CC_DIRECT	mitochondrion	RT		15	11.2	0.086	1.6	0.58
GOTERM_CC_DIRECT	axon	RT		6	4.5	0.091	2.5	0.6
GOTERM_CC_DIRECT	actin cytoskeleton	RT		5	3.7	0.093	2.9	0.61
GOTERM_CC_DIRECT	condensed chromosome, centromeric region	RT		2	1.5	0.098	19.4	0.62
GOTERM_MF_DIRECT	enzyme binding	RT		19	14.2	1.9e-10	7	8e-08
GOTERM_MF_DIRECT	protein binding	RT		119	88.8	3.6e-10	1.4	8e-08
GOTERM_MF_DIRECT	protein serine/threonine kinase activity	RT		18	13.4	2.7e-09	6.4	3.9e-07
GOTERM_MF_DIRECT	ATP binding	RT		32	23.9	4.3e-08	3	4.8e-06
GOTERM_MF_DIRECT	protein serine/threonine/tyrosine kinase activity	RT		17	12.7	7.5e-08	5.5	6.6e-06
GOTERM_MF_DIRECT	identical protein binding	RT		32	23.9	6.2e-07	2.6	4.6e-05
GOTERM_MF_DIRECT	protein kinase activity	RT		13	9.7	1.4e-05	4.9	0.00091
GOTERM_MF_DIRECT	transcription factor binding	RT		6	4.5	8.6e-05	13.3	0.0043
GOTERM_MF_DIRECT	insulin-like growth factor I binding	RT		4	3	8.7e-05	44.2	0.0043
GOTERM_MF_DIRECT	promoter-specific chromatin binding	RT		6	4.5	0.0001	12.9	0.0044
GOTERM_MF_DIRECT	RNA polymerase II sequence-specific DNA binding transcription factor binding	RT		8	6	0.00032	6.2	0.012
GOTERM_MF_DIRECT	DNA binding	RT		22	16.4	0.00036	2.3	0.012
GOTERM_MF_DIRECT	protein C-terminus binding	RT		8	6	0.00038	6	0.012
GOTERM_MF_DIRECT	ubiquitin-specific protease binding	RT		4	3	0.00039	27.4	0.012
GOTERM_MF_DIRECT	ubiquitin-like protein ligase binding	RT		4	3	0.00059	24	0.017
GOTERM_MF_DIRECT	chromatin binding	RT		12	9	0.00073	3.4	0.02
GOTERM_MF_DIRECT	macromolecular complex binding	RT		10	7.5	0.0011	3.9	0.029
GOTERM_MF_DIRECT	insulin-like growth factor II binding	RT		3	2.2	0.0013	53.9	0.032
GOTERM_MF_DIRECT	double-stranded DNA binding	RT		6	4.5	0.0014	7.3	0.032
GOTERM_MF_DIRECT	kinase activity	RT		8	6	0.0015	4.8	0.033
GOTERM_MF_DIRECT	protein kinase activator activity	RT		4	3	0.0026	14.4	0.055
GOTERM_MF_DIRECT	RNA binding	RT		21	15.7	0.0029	2	0.058
GOTERM_MF_DIRECT	protein kinase binding	RT		11	8.2	0.0034	3	0.066
GOTERM_MF_DIRECT	transcription coactivator binding	RT		4	3	0.0044	12	0.082
GOTERM_MF_DIRECT	protein homodimerization activity	RT		13	9.7	0.0057	2.5	0.1
GOTERM_MF_DIRECT	protein N-terminus binding	RT		5	3.7	0.0067	6.7	0.11
GOTERM_MF_DIRECT	RNA polymerase II core promoter sequence-specific DNA binding	RT		3	2.2	0.0091	20.5	0.15
GOTERM_MF_DIRECT	insulin-like growth factor binding	RT		3	2.2	0.011	18.8	0.17
GOTERM_MF_DIRECT	histone acetyltransferase binding	RT		3	2.2	0.013	17.3	0.19
GOTERM_MF_DIRECT	p53 binding	RT		4	3	0.014	7.9	0.21
GOTERM_MF_DIRECT	chromatin DNA binding	RT		4	3	0.021	6.8	0.3
GOTERM_MF_DIRECT	ATPase activity	RT		8	6	0.034	2.6	0.47
GOTERM_MF_DIRECT	ligand-dependent nuclear receptor binding	RT		3	2.2	0.037	9.8	0.48
GOTERM_MF_DIRECT	kinase binding	RT		4	3	0.037	5.4	0.48
GOTERM_MF_DIRECT	kinetochore binding	RT		2	1.5	0.041	47.9	0.51
GOTERM_MF_DIRECT	protein tyrosine kinase binding	RT		3	2.2	0.048	8.5	0.59
GOTERM_MF_DIRECT	transcription corepressor activity	RT		5	3.7	0.053	3.5	0.63
GOTERM_MF_DIRECT	histone binding	RT		5	3.7	0.06	3.4	0.69
GOTERM_MF_DIRECT	importin-alpha family protein binding	RT		2	1.5	0.06	31.9	0.69
GOTERM_MF_DIRECT	ubiquitin protein ligase binding	RT		6	4.5	0.067	2.7	0.75
GOTERM_MF_DIRECT	type II transforming growth factor beta receptor binding	RT		2	1.5	0.073	26.1	0.79
GOTERM_MF_DIRECT	damaged DNA binding	RT		3	2.2	0.078	6.4	0.82
GOTERM_MF_DIRECT	protein serine/threonine kinase inhibitor activity	RT		2	1.5	0.08	24	0.82
GOTERM_MF_DIRECT	folic acid binding	RT		2	1.5	0.092	20.5	0.91
GOTERM_MF_DIRECT	double-stranded RNA binding	RT		3	2.2	0.093	5.8	0.91
GOTERM_MF_DIRECT	integrin binding	RT		4	3	0.099	3.6	0.93
GOTERM_MF_DIRECT	protein domain specific binding	RT		5	3.7	0.099	2.8	0.93

## Sheet: Table S4
Table S5. KEGG enrichment analysis of ARDEGs
Category	Term	RT	Genes	Count	%	P-Value	Fold Enrichment	Benjamini
KEGG_PATHWAY	Human T-cell leukemia virus 1 infection	RT		15	11.2	7.3e-08	6.3	1.8e-05
KEGG_PATHWAY	Cellular senescence	RT		12	9	6.8e-07	7.2	8.2e-05
KEGG_PATHWAY	Hepatitis B	RT		12	9	9.9e-07	6.9	8.2e-05
KEGG_PATHWAY	Human papillomavirus infection	RT		16	11.9	1.7e-06	4.5	0.00011
KEGG_PATHWAY	Cell cycle	RT		11	8.2	5.7e-06	6.5	0.00028
KEGG_PATHWAY	FoxO signaling pathway	RT		10	7.5	9.3e-06	7.1	0.00038
KEGG_PATHWAY	Longevity regulating pathway	RT		8	6	4e-05	8.4	0.0014
KEGG_PATHWAY	Autophagy - animal	RT		10	7.5	5.8e-05	5.7	0.0018
KEGG_PATHWAY	Influenza A	RT		10	7.5	7.7e-05	5.5	0.0021
KEGG_PATHWAY	AGE-RAGE signaling pathway in diabetic complications	RT		8	6	8.6e-05	7.5	0.0021
KEGG_PATHWAY	Measles	RT		9	6.7	0.0001	6.1	0.0023
KEGG_PATHWAY	NOD-like receptor signaling pathway	RT		10	7.5	0.00015	5	0.003
KEGG_PATHWAY	Kaposi sarcoma-associated herpesvirus infection	RT		10	7.5	0.0002	4.8	0.0039
KEGG_PATHWAY	Pathways in cancer	RT		16	11.9	0.00042	2.8	0.0074
KEGG_PATHWAY	Osteoclast differentiation	RT		8	6	0.00055	5.5	0.0091
KEGG_PATHWAY	Alzheimer disease	RT		13	9.7	0.00069	3.2	0.011
KEGG_PATHWAY	Renal cell carcinoma	RT		6	4.5	0.00079	8.1	0.012
KEGG_PATHWAY	Pancreatic cancer	RT		6	4.5	0.0012	7.4	0.017
KEGG_PATHWAY	TNF signaling pathway	RT		7	5.2	0.0013	5.7	0.017
KEGG_PATHWAY	Viral carcinogenesis	RT		9	6.7	0.0014	4.1	0.017
KEGG_PATHWAY	EGFR tyrosine kinase inhibitor resistance	RT		6	4.5	0.0015	7.1	0.017
KEGG_PATHWAY	Human immunodeficiency virus 1 infection	RT		9	6.7	0.0018	4	0.02
KEGG_PATHWAY	Tuberculosis	RT		8	6	0.0029	4.1	0.031
KEGG_PATHWAY	Apoptosis	RT		7	5.2	0.0031	4.8	0.032
KEGG_PATHWAY	Longevity regulating pathway - multiple species	RT		5	3.7	0.0039	7.6	0.039
KEGG_PATHWAY	Chagas disease	RT		6	4.5	0.0044	5.5	0.039
KEGG_PATHWAY	MAPK signaling pathway	RT		10	7.5	0.0045	3.1	0.039
KEGG_PATHWAY	PI3K-Akt signaling pathway	RT		11	8.2	0.0045	2.9	0.039
KEGG_PATHWAY	Shigellosis	RT		9	6.7	0.0045	3.4	0.039
KEGG_PATHWAY	C-type lectin receptor signaling pathway	RT		6	4.5	0.0048	5.4	0.04
KEGG_PATHWAY	Epstein-Barr virus infection	RT		8	6	0.0055	3.7	0.044
KEGG_PATHWAY	Toll-like receptor signaling pathway	RT		6	4.5	0.0057	5.2	0.044
KEGG_PATHWAY	HIF-1 signaling pathway	RT		6	4.5	0.0059	5.1	0.044
KEGG_PATHWAY	mTOR signaling pathway	RT		7	5.2	0.0061	4.2	0.045
KEGG_PATHWAY	Toxoplasmosis	RT		6	4.5	0.0064	5	0.045
KEGG_PATHWAY	Hepatitis C	RT		7	5.2	0.0065	4.1	0.045
KEGG_PATHWAY	Mitophagy - animal	RT		5	3.7	0.007	6.5	0.047
KEGG_PATHWAY	Chronic myeloid leukemia	RT		5	3.7	0.0085	6.1	0.054
KEGG_PATHWAY	Hepatocellular carcinoma	RT		7	5.2	0.0087	3.9	0.054
KEGG_PATHWAY	Growth hormone synthesis, secretion and action	RT		6	4.5	0.0088	4.7	0.054
KEGG_PATHWAY	Thyroid hormone signaling pathway	RT		6	4.5	0.0091	4.6	0.054
KEGG_PATHWAY	AMPK signaling pathway	RT		6	4.5	0.0091	4.6	0.054
KEGG_PATHWAY	Human cytomegalovirus infection	RT		8	6	0.0097	3.3	0.056
KEGG_PATHWAY	PD-L1 expression and PD-1 checkpoint pathway in cancer	RT		5	3.7	0.015	5.2	0.082
KEGG_PATHWAY	Prostate cancer	RT		5	3.7	0.019	4.8	0.11
KEGG_PATHWAY	Lipid and atherosclerosis	RT		7	5.2	0.026	3	0.14
KEGG_PATHWAY	Necroptosis	RT		6	4.5	0.027	3.5	0.14
KEGG_PATHWAY	Insulin resistance	RT		5	3.7	0.027	4.3	0.14
KEGG_PATHWAY	Pathways of neurodegeneration - multiple diseases	RT		11	8.2	0.029	2.2	0.14
KEGG_PATHWAY	Inflammatory bowel disease	RT		4	3	0.031	5.7	0.16
KEGG_PATHWAY	Coronavirus disease - COVID-19	RT		7	5.2	0.036	2.8	0.17
KEGG_PATHWAY	Neurotrophin signaling pathway	RT		5	3.7	0.037	3.9	0.17
KEGG_PATHWAY	Central carbon metabolism in cancer	RT		4	3	0.038	5.3	0.17
KEGG_PATHWAY	Ras signaling pathway	RT		7	5.2	0.039	2.8	0.17
KEGG_PATHWAY	RIG-I-like receptor signaling pathway	RT		4	3	0.039	5.3	0.17
KEGG_PATHWAY	T cell receptor signaling pathway	RT		5	3.7	0.039	3.9	0.17
KEGG_PATHWAY	Antifolate resistance	RT		3	2.2	0.04	9.3	0.17
KEGG_PATHWAY	Platinum drug resistance	RT		4	3	0.042	5.1	0.18
KEGG_PATHWAY	p53 signaling pathway	RT		4	3	0.044	5	0.18
KEGG_PATHWAY	Glioma	RT		4	3	0.045	5	0.19
KEGG_PATHWAY	Relaxin signaling pathway	RT		5	3.7	0.048	3.6	0.19
KEGG_PATHWAY	Circadian rhythm	RT		3	2.2	0.05	8.2	0.2
KEGG_PATHWAY	Insulin signaling pathway	RT		5	3.7	0.057	3.4	0.23
KEGG_PATHWAY	B cell receptor signaling pathway	RT		4	3	0.059	4.4	0.23
KEGG_PATHWAY	Apelin signaling pathway	RT		5	3.7	0.06	3.4	0.23
KEGG_PATHWAY	ErbB signaling pathway	RT		4	3	0.061	4.4	0.23
KEGG_PATHWAY	Colorectal cancer	RT		4	3	0.063	4.3	0.23
KEGG_PATHWAY	Alcoholic liver disease	RT		5	3.7	0.064	3.3	0.23
KEGG_PATHWAY	Spinocerebellar ataxia	RT		5	3.7	0.065	3.3	0.23
KEGG_PATHWAY	Homologous recombination	RT		3	2.2	0.07	6.8	0.24
KEGG_PATHWAY	Hypertrophic cardiomyopathy	RT		4	3	0.07	4.1	0.24
KEGG_PATHWAY	Graft-versus-host disease	RT		3	2.2	0.073	6.7	0.25
KEGG_PATHWAY	Gastric cancer	RT		5	3.7	0.073	3.1	0.25
KEGG_PATHWAY	Small cell lung cancer	RT		4	3	0.074	4.1	0.25
KEGG_PATHWAY	Non-alcoholic fatty liver disease	RT		5	3.7	0.082	3	0.27
KEGG_PATHWAY	Hippo signaling pathway	RT		5	3.7	0.085	3	0.28
KEGG_PATHWAY	Endocrine resistance	RT		4	3	0.086	3.8	0.28
KEGG_PATHWAY	Progesterone-mediated oocyte maturation	RT		4	3	0.094	3.7	0.3
KEGG_PATHWAY	NF-kappa B signaling pathway	RT		4	3	0.098	3.6	0.3
KEGG_PATHWAY	Malaria	RT		3	2.2	0.098	5.6	0.3

## Sheet: Table S5
Table S5. Co-expression modules
ID	moduleColor
A1BG	magenta
ABCA7	magenta
ABCE1	magenta
ABITRAM	magenta
ABTB3	magenta
ACO1	magenta
ACP1	magenta
ACYP1	magenta
ADAM11	magenta
ADAMTSL5	magenta
ADAP1	magenta
ADCY4	magenta
ADGB	magenta
ADGRD2	magenta
ADIPOQ	magenta
ADIPOR2	magenta
ALG5	magenta
ALKBH3	magenta
ALPP	magenta
AMER3	magenta
ANGPTL3	magenta
ANKRD60	magenta
ANKRD9	magenta
ANO8	magenta
API5	magenta
APOF	magenta
APOL3	magenta
APPL2	magenta
ARAP2	magenta
ARHGAP18	magenta
ARHGAP5	magenta
ARL2BP	magenta
ARL4A	magenta
ARMC1	magenta
ARSF	magenta
ASCC3	magenta
ATG16L1	magenta
ATIC	magenta
ATP1B4	magenta
ATP5MC1	magenta
ATXN10	magenta
BAIAP2L2	magenta
BATF2	magenta
BBX	magenta
BCCIP	magenta
BCLAF1	magenta
BHLHE22	magenta
BLOC1S3	magenta
BNIP1	magenta
BTBD17	magenta
BTK	magenta
BTN3A3	magenta
C2CD4A	magenta
C2CD5	magenta
C2orf15	magenta
C3orf14	magenta
C3orf38	magenta
C4A	magenta
CACNA2D2	magenta
CALHM1	magenta
CALM2	magenta
CALU	magenta
CAMSAP2	magenta
CAMTA1	magenta
CARD10	magenta
CATSPERD	magenta
CBS	magenta
CCDC159	magenta
CCDC59	magenta
CCL8	magenta
CCND2	magenta
CCT4	magenta
CCT8	magenta
CD2	magenta
CD2AP	magenta
CD36	magenta
CD52	magenta
CD69	magenta
CEBPZ	magenta
CEL	magenta
CEND1	magenta
CENPBD1P	magenta
CENPS	magenta
CENPW	magenta
CEP162	magenta
CFAP210	magenta
CHD1L	magenta
CHD9	magenta
CHIC1	magenta
CHRNA5	magenta
CHST1	magenta
CHURC1	magenta
CIBAR1	magenta
CKAP2	magenta
CLDN19	magenta
CLEC1A	magenta
CLNS1A	magenta
CNOT7	magenta
COLEC12	magenta
COPG2	magenta
COPS3	magenta
COPS8	magenta
COPS9	magenta
COPZ1	magenta
COX5B	magenta
COX6C	magenta
COX7A2	magenta
CRCT1	magenta
CRNN	magenta
CRYL1	magenta
CRYZ	magenta
CT47C1	magenta
CWC27	magenta
CXCL10	magenta
CXCL11	magenta
CYB5B	magenta
CYCS	magenta
DACH2	magenta
DCTN3	magenta
DDX1	magenta
DDX50	magenta
DDX60	magenta
DDX60L	magenta
DENND4C	magenta
DERA	magenta
DMAC2	magenta
DOCK10	magenta
DOP1A	magenta
DPP4	magenta
DRAM2	magenta
DRG1	magenta
DTX3L	magenta
DYNLL1	magenta
EAF2	magenta
EEF1A1	magenta
EEF1B2	magenta
EFEMP2	magenta
EFHB	magenta
EIF2A	magenta
EIF2AK2	magenta
EIF3E	magenta
EIF3H	magenta
EIF3L	magenta
EIF3M	magenta
EIF5B	magenta
ELP1	magenta
ELP2	magenta
ENO3	magenta
ENO4	magenta
ENPP2	magenta
ENPP5	magenta
EPRS1	magenta
EPS15L1	magenta
ERH	magenta
ERVV-2	magenta
ESF1	magenta
ETV7	magenta
EXOSC8	magenta
EXOSC9	magenta
EXTL3	magenta
FABP3	magenta
FAF1	magenta
FAM114A1	magenta
FAM177B	magenta
FAM193B	magenta
FAM219B	magenta
FAM98C	magenta
FASTKD1	magenta
FASTKD3	magenta
FBXL22	magenta
FCGR1A	magenta
FEZF2	magenta
FGF18	magenta
FGF8	magenta
FKBP1B	magenta
FRG2	magenta
GALR2	magenta
GALR3	magenta
GAR1	magenta
GARIN5B	magenta
GBP1	magenta
GBP3	magenta
GBP5	magenta
GBP7	magenta
GCFC2	magenta
GEMIN2	magenta
GFI1	magenta
GFRA2	magenta
GIMAP7	magenta
GJA4	magenta
GLO1	magenta
GLUD1	magenta
GNPDA2	magenta
GPATCH2	magenta
GPR182	magenta
GPR35	magenta
GRID2IP	magenta
GRIN2D	magenta
GSTA4	magenta
GTF2A2	magenta
GTF2B	magenta
GZMK	magenta
H2AC13	magenta
H2AC17	magenta
H2AZ2	magenta
H2BC10	magenta
H2BC3	magenta
H4C3	magenta
HACL1	magenta
HCFC2	magenta
HDGFL2	magenta
HDX	magenta
HIBADH	magenta
HIGD1A	magenta
HPGDS	magenta
HRH3	magenta
HS6ST1	magenta
HSBP1L1	magenta
HSPA14	magenta
HSPE1	magenta
IARS1	magenta
IARS2	magenta
IDH1	magenta
IFI16	magenta
IFIH1	magenta
IFIT5	magenta
IFNL3	magenta
IFT52	magenta
IFT88	magenta
IGFN1	magenta
IL11	magenta
IL6ST	magenta
ILF2	magenta
INSM2	magenta
INTS1	magenta
INTS12	magenta
INTS7	magenta
IQCB1	magenta
IRAG2	magenta
IRGC	magenta
ITFG1	magenta
ITGA4	magenta
JKAMP	magenta
JRKL	magenta
KANK4	magenta
KAT14	magenta
KBTBD12	magenta
KBTBD3	magenta
KDELR3	magenta
KHDC4	magenta
KIAA0753	magenta
KIAA1210	magenta
KIF16B	magenta
KIFAP3	magenta
KRTAP9-6	magenta
KYAT1	magenta
LAMA2	magenta
LAMP3	magenta
LDAH	magenta
LILRA4	magenta
LILRB5	magenta
LINC03040	magenta
LIPA	magenta
LMAN1	magenta
LOC110384692	magenta
LOC124900587	magenta
LOC124900588	magenta
LSG1	magenta
LTBP2	magenta
LYNX1-SLURP2	magenta
LYPLAL1	magenta
LZTS1	magenta
MAFA	magenta
MAK16	magenta
MANF	magenta
MAP4K2	magenta
MAPK8IP2	magenta
MATR3	magenta
MBIP	magenta
MC1R	magenta
MCEE	magenta
MCM2	magenta
MDM1	magenta
MEAF6	magenta
MEGF6	magenta
MICOS10	magenta
MIER3	magenta
MLF1	magenta
MLH3	magenta
MMD	magenta
MOCS2	magenta
MOSPD1	magenta
MPHOSPH10	magenta
MPHOSPH6	magenta
MRPL1	magenta
MRPL32	magenta
MRPL36	magenta
MRPL45	magenta
MRPL58	magenta
MRPS14	magenta
MRPS15	magenta
MRPS31	magenta
MRPS9	magenta
MS4A4A	magenta
MSANTD4	magenta
MSMB	magenta
MSMO1	magenta
MTCH2	magenta
MTCP1	magenta
MTERF1	magenta
MTERF3	magenta
MTFR1	magenta
MTIF3	magenta
MYLK4	magenta
NACA	magenta
NAF1	magenta
NAP1L1	magenta
NCAPG	magenta
NDUFA12	magenta
NDUFA8	magenta
NDUFAF2	magenta
NDUFAF4	magenta
NDUFB3	magenta
NDUFB4	magenta
NDUFB8	magenta
NDUFS5	magenta
NDUFV2	magenta
NET1	magenta
NHP2	magenta
NOC3L	magenta
NOP58	magenta
NR3C2	magenta
NT5C3A	magenta
NUCKS1	magenta
NUDT12	magenta
NUDT13	magenta
NUP205	magenta
NYAP1	magenta
NYX	magenta
OAT	magenta
OLA1	magenta
OR10A3	magenta
OR2A4	magenta
OR52B6	magenta
OR7G2	magenta
ORC3	magenta
ORMDL1	magenta
OSTC	magenta
P2RX2	magenta
P2RY14	magenta
PALD1	magenta
PANK4	magenta
PAQR3	magenta
PARK7	magenta
PARP14	magenta
PARP9	magenta
PATL2	magenta
PBLD	magenta
PCARE	magenta
PCDHA9	magenta
PDCL3	magenta
PDE1B	magenta
PDE5A	magenta
PDILT	magenta
PGGT1B	magenta
PGPEP1	magenta
PHETA2	magenta
PHF11	magenta
PHKB	magenta
PHOX2A	magenta
PHYH	magenta
PIR	magenta
PLCD1	magenta
PLGRKT	magenta
PLRG1	magenta
PLS3	magenta
PNMA6A	magenta
POC5	magenta
POLR2K	magenta
PPEF2	magenta
PPIA	magenta
PPIH	magenta
PPIL1	magenta
PPM1F	magenta
PPP1R3G	magenta
PPP2R2D	magenta
PPP2R3B	magenta
PPP3CC	magenta
PRH1	magenta
PRKACB	magenta
PRKRA	magenta
PRPSAP1	magenta
PRR9	magenta
PSMA2	magenta
PSMA4	magenta
PSMA5	magenta
PSMA6	magenta
PSMB8	magenta
PSMB9	magenta
PTER	magenta
PTGER1	magenta
PTGIR	magenta
PTPN22	magenta
PTPRO	magenta
PUM3	magenta
PWP2	magenta
PWWP2A	magenta
RAB4B	magenta
RANBP17	magenta
RARB	magenta
RASGRP1	magenta
RBIS	magenta
RBM45	magenta
RBMX2	magenta
RBP2	magenta
RELCH	magenta
REXO2	magenta
RFX3	magenta
RHOH	magenta
RIDA	magenta
RIGI	magenta
RIIAD1	magenta
RIN1	magenta
RIOK1	magenta
RIOX2	magenta
RIPOR1	magenta
RNASE2	magenta
RNF223	magenta
RP9	magenta
RPIA	magenta
RPL10	magenta
RPL11	magenta
RPL12	magenta
RPL15	magenta
RPL17	magenta
RPL19	magenta
RPL21	magenta
RPL22	magenta
RPL23	magenta
RPL23A	magenta
RPL24	magenta
RPL26	magenta
RPL26L1	magenta
RPL27	magenta
RPL27A	magenta
RPL29	magenta
RPL30	magenta
RPL32	magenta
RPL34	magenta
RPL35A	magenta
RPL36A	magenta
RPL37	magenta
RPL37A	magenta
RPL38	magenta
RPL39	magenta
RPL4	magenta
RPL41	magenta
RPL5	magenta
RPL6	magenta
RPL7	magenta
RPL9	magenta
RPS10	magenta
RPS11	magenta
RPS12	magenta
RPS13	magenta
RPS14	magenta
RPS15A	magenta
RPS17	magenta
RPS18	magenta
RPS20	magenta
RPS21	magenta
RPS23	magenta
RPS24	magenta
RPS25	magenta
RPS26	magenta
RPS27	magenta
RPS27A	magenta
RPS27L	magenta
RPS29	magenta
RPS3	magenta
RPS3A	magenta
RPS4X	magenta
RPS6	magenta
RPS7	magenta
RPS8	magenta
RRM1	magenta
RSL1D1	magenta
RSPH6A	magenta
RTCB	magenta
RTP4	magenta
RTP5	magenta
RWDD1	magenta
S100B	magenta
SAAL1	magenta
SAMD9	magenta
SAMD9L	magenta
SC5D	magenta
SCN3B	magenta
SCOC	magenta
SCP2	magenta
SCRT2	magenta
SDAD1	magenta
SEC11C	magenta
SELENOP	magenta
SERBP1	magenta
SESN1	magenta
SFT2D3	magenta
SFXN4	magenta
SH2D3A	magenta
SKP1	magenta
SLC10A7	magenta
SLC13A1	magenta
SLC16A7	magenta
SLC17A7	magenta
SLC25A12	magenta
SLC25A47	magenta
SLC26A5	magenta
SLC2A4	magenta
SLC30A9	magenta
SLC35F3	magenta
SLC4A2	magenta
SLC4A9	magenta
SLC9A9	magenta
SLFN11	magenta
SLIRP	magenta
SLITRK2	magenta
SLX9	magenta
SMARCA1	magenta
SMARCAD1	magenta
SMIM30	magenta
SNRNP40	magenta
SNRPE	magenta
SNRPG	magenta
SNTB2	magenta
SNX22	magenta
SNX24	magenta
SOST	magenta
SP110	magenta
SP140	magenta
SPAG1	magenta
SPATA32	magenta
SPEGNB	magenta
SRBD1	magenta
SRI	magenta
SRP14	magenta
SSC4D	magenta
SSR3	magenta
ST13	magenta
STAT1	magenta
STEAP1	magenta
STPG3	magenta
STX1B	magenta
SUCLG1	magenta
TACC3	magenta
TAF15	magenta
TAF5L	magenta
TAP1	magenta
TARS1	magenta
TBCA	magenta
TBPL1	magenta
TBPL2	magenta
TBX6	magenta
TCERG1	magenta
TDGF1	magenta
TEX15	magenta
TEX22	magenta
TGDS	magenta
TIA1	magenta
TIMM10	magenta
TIMM8B	magenta
TIRAP	magenta
TLCD2	magenta
TLCD5	magenta
TMEFF1	magenta
TMEM106C	magenta
TMEM126A	magenta
TMEM144	magenta
TMEM164	magenta
TMEM167A	magenta
TMEM191B	magenta
TMEM263	magenta
TMEM38B	magenta
TMEM82	magenta
TMEM89	magenta
TMOD4	magenta
TNFSF10	magenta
TNK2	magenta
TOMM20	magenta
TOMM70	magenta
TOPBP1	magenta
TPCN2	magenta
TPP2	magenta
TRAFD1	magenta
TRANK1	magenta
TRAT1	magenta
TRIAP1	magenta
TRIM11	magenta
TRIT1	magenta
TRPM5	magenta
TSGA10	magenta
TXN	magenta
TXNDC9	magenta
TYMS	magenta
TYW1	magenta
UAP1	magenta
UBA52	magenta
UBE2L6	magenta
UBL5	magenta
UCHL3	magenta
UFM1	magenta
UFSP2	magenta
UPK1A	magenta
UQCC5	magenta
UQCRH	magenta
USP30	magenta
UTF1	magenta
UTRN	magenta
VDAC1	magenta
VDAC2	magenta
VTI1B	magenta
WARS1	magenta
WARS2	magenta
WDHD1	magenta
WDR11	magenta
WDR35	magenta
WDR43	magenta
WDR75	magenta
WFIKKN1	magenta
XPOT	magenta
XRN1	magenta
YAE1	magenta
YES1	magenta
YTHDC2	magenta
ZC3HAV1	magenta
ZC4H2	magenta
ZCCHC10	magenta
ZFAND1	magenta
ZFAND4	magenta
ZIC5	magenta
ZMYND11	magenta
ZMYND12	magenta
ZNF12	magenta
ZNF146	magenta
ZNF280D	magenta
ZNF318	magenta
ZNF322	magenta
ZNF329	magenta
ZNF510	magenta
ZNF518A	magenta
ZNF563	magenta
ZNF596	magenta
ZNF680	magenta
ZNF700	magenta
ZNF724	magenta
ZNF74	magenta
ZNF775	magenta
ZNF792	magenta
ZNF821	magenta
ZNF84	magenta
ZNG1B	magenta
ZSCAN26	magenta

## Sheet: Table S6
Table S6. KEGG enrichment analysis of ARDS-ARDEGs
ID	Description	GeneRatio	BgRatio	pvalue	p.adjust	qvalue	geneID	Count
hsa05017	Spinocerebellar ataxia	3/10	143/8223	0.000565067	0.0259931	0.015465	PSMA2/PSMA5/TBPL1	3
hsa03050	Proteasome	2/10	46/8223	0.00133897	0.0307964	0.0183228	PSMA2/PSMA5	2
hsa05016	Huntington disease	3/10	306/8223	0.00503949	0.0722227	0.04297	PSMA2/PSMA5/TBPL1	3
hsa05165	Human papillomavirus infection	3/10	331/8223	0.00628024	0.0722227	0.04297	EIF2AK2/STAT1/TBPL1	3
hsa05010	Alzheimer disease	3/10	384/8223	0.00948524	0.0794297	0.047258	EIF2AK2/PSMA2/PSMA5	3
hsa05162	Measles	2/10	139/8223	0.0116806	0.0794297	0.047258	EIF2AK2/STAT1	2
hsa05160	Hepatitis C	2/10	157/8223	0.0147406	0.0794297	0.047258	EIF2AK2/STAT1	2
hsa04217	Necroptosis	2/10	159/8223	0.0151001	0.0794297	0.047258	EIF2AK2/STAT1	2
hsa05164	Influenza A	2/10	171/8223	0.0173375	0.0794297	0.047258	EIF2AK2/STAT1	2
hsa04621	NOD-like receptor signaling pathway	2/10	186/8223	0.0203232	0.0794297	0.047258	IFI16/STAT1	2
hsa05167	Kaposi sarcoma-associated herpesvirus infection	2/10	194/8223	0.0219993	0.0794297	0.047258	EIF2AK2/STAT1	2
hsa05169	Epstein-Barr virus infection	2/10	202/8223	0.0237322	0.0794297	0.047258	EIF2AK2/STAT1	2
hsa00670	One carbon pool by folate	1/10	20/8223	0.0240706	0.0794297	0.047258	TYMS	1
hsa05203	Viral carcinogenesis	2/10	204/8223	0.0241743	0.0794297	0.047258	EIF2AK2/TBPL1	2
hsa04977	Vitamin digestion and absorption	1/10	24/8223	0.0288216	0.0883205	0.0525477	RBP2	1
hsa05171	Coronavirus disease - COVID-19	2/10	232/8223	0.0307202	0.0883205	0.0525477	EIF2AK2/STAT1	2
hsa01523	Antifolate resistance	1/10	30/8223	0.0359092	0.0971661	0.0578105	TYMS	1
hsa05012	Parkinson disease	2/10	266/8223	0.0395233	0.100343	0.0597005	PSMA2/PSMA5	2
hsa05020	Prion disease	2/10	273/8223	0.0414459	0.100343	0.0597005	PSMA2/PSMA5	2
hsa03440	Homologous recombination	1/10	41/8223	0.0487823	0.112199	0.0667547	TOPBP1	1
hsa03022	Basal transcription factors	1/10	45/8223	0.0534249	0.117026	0.0696264	TBPL1	1
hsa00240	Pyrimidine metabolism	1/10	58/8223	0.0683729	0.139027	0.082716	TYMS	1
hsa05014	Amyotrophic lateral sclerosis	2/10	364/8223	0.0695133	0.139027	0.082716	PSMA2/PSMA5	2
hsa05321	Inflammatory bowel disease	1/10	65/8223	0.0763336	0.146306	0.0870471	STAT1	1
hsa04917	Prolactin signaling pathway	1/10	70/8223	0.0819822	0.150847	0.0897489	STAT1	1
hsa05212	Pancreatic cancer	1/10	76/8223	0.0887195	0.153057	0.0910639	STAT1	1
hsa05140	Leishmaniasis	1/10	77/8223	0.0898381	0.153057	0.0910639	STAT1	1
hsa01232	Nucleotide metabolism	1/10	85/8223	0.098742	0.161779	0.0962528	TYMS	1
hsa05235	PD-L1 expression and PD-1 checkpoint pathway in cancer	1/10	89/8223	0.103165	0.161779	0.0962528	STAT1	1
hsa04658	Th1 and Th2 cell differentiation	1/10	92/8223	0.106469	0.161779	0.0962528	STAT1	1
hsa05022	Pathways of neurodegeneration - multiple diseases	2/10	476/8223	0.110598	0.161779	0.0962528	PSMA2/PSMA5	2
hsa04933	AGE-RAGE signaling pathway in diabetic complications	1/10	100/8223	0.115226	0.161779	0.0962528	STAT1	1
hsa04620	Toll-like receptor signaling pathway	1/10	104/8223	0.119576	0.161779	0.0962528	STAT1	1
hsa04625	C-type lectin receptor signaling pathway	1/10	104/8223	0.119576	0.161779	0.0962528	STAT1	1
hsa04659	Th17 cell differentiation	1/10	108/8223	0.123906	0.162848	0.0968889	STAT1	1
hsa05145	Toxoplasmosis	1/10	112/8223	0.128217	0.163833	0.0974751	STAT1	1
hsa04935	Growth hormone synthesis, secretion and action	1/10	120/8223	0.136782	0.166868	0.0992809	STAT1	1
hsa04919	Thyroid hormone signaling pathway	1/10	121/8223	0.137848	0.166868	0.0992809	STAT1	1
hsa04380	Osteoclast differentiation	1/10	128/8223	0.145272	0.171346	0.101945	STAT1	1
hsa05161	Hepatitis B	1/10	162/8223	0.18052	0.207089	0.123211	STAT1	1
hsa04630	JAK-STAT signaling pathway	1/10	166/8223	0.184579	0.207089	0.123211	STAT1	1
hsa04141	Protein processing in endoplasmic reticulum	1/10	171/8223	0.189628	0.207688	0.123567	EIF2AK2	1
hsa05152	Tuberculosis	1/10	180/8223	0.198646	0.212505	0.126433	STAT1	1
hsa04062	Chemokine signaling pathway	1/10	192/8223	0.210528	0.220098	0.130951	STAT1	1
hsa05166	Human T-cell leukemia virus 1 infection	1/10	222/8223	0.239544	0.244868	0.145688	TBPL1	1
hsa04080	Neuroactive ligand-receptor interaction	1/10	367/8223	0.366713	0.366713	0.218182	P2RY14	1

## Sheet: Table S7
Table S7. BP enrichment analysis of ARDS-ARDEGs
ID	Description	GeneRatio	BgRatio	pvalue	p.adjust	qvalue	geneID	Count
GO:1902036	regulation of hematopoietic stem cell differentiation	3/14	73/18866	1.96218e-05	0.00308197	0.00148827	EIF2AK2/PSMA2/PSMA5	3
GO:1901532	regulation of hematopoietic progenitor cell differentiation	3/14	86/18866	3.21033e-05	0.00308197	0.00148827	EIF2AK2/PSMA2/PSMA5	3
GO:0060218	hematopoietic stem cell differentiation	3/14	87/18866	3.32353e-05	0.00308197	0.00148827	EIF2AK2/PSMA2/PSMA5	3
GO:0009265	2'-deoxyribonucleotide biosynthetic process	2/14	13/18866	3.97011e-05	0.00308197	0.00148827	TBPL1/TYMS	2
GO:0046385	deoxyribose phosphate biosynthetic process	2/14	13/18866	3.97011e-05	0.00308197	0.00148827	TBPL1/TYMS	2
GO:0010972	negative regulation of G2/M transition of mitotic cell cycle	3/14	96/18866	4.46246e-05	0.00308197	0.00148827	PSMA2/PSMA5/TOPBP1	3
GO:0048525	negative regulation of viral process	3/14	104/18866	5.66762e-05	0.00308197	0.00148827	EIF2AK2/IFI16/STAT1	3
GO:0045088	regulation of innate immune response	4/14	307/18866	6.05118e-05	0.00308197	0.00148827	IFI16/PSMA2/PSMA5/STAT1	4
GO:0009263	deoxyribonucleotide biosynthetic process	2/14	16/18866	6.1001e-05	0.00308197	0.00148827	TBPL1/TYMS	2
GO:1902750	negative regulation of cell cycle G2/M phase transition	3/14	108/18866	6.34282e-05	0.00308197	0.00148827	PSMA2/PSMA5/TOPBP1	3
GO:0009200	deoxyribonucleoside triphosphate metabolic process	2/14	18/18866	7.77104e-05	0.00308197	0.00148827	TBPL1/TYMS	2
GO:2000736	regulation of stem cell differentiation	3/14	118/18866	8.25643e-05	0.00308197	0.00148827	EIF2AK2/PSMA2/PSMA5	3
GO:0009148	pyrimidine nucleoside triphosphate biosynthetic process	2/14	19/18866	8.68159e-05	0.00308197	0.00148827	TBPL1/TYMS	2
GO:0009219	pyrimidine deoxyribonucleotide metabolic process	2/14	19/18866	8.68159e-05	0.00308197	0.00148827	TBPL1/TYMS	2
GO:0009615	response to virus	4/14	349/18866	9.94978e-05	0.00329669	0.00159196	EIF2AK2/IFI16/PSMA2/STAT1	4
GO:0010499	proteasomal ubiquitin-independent protein catabolic process	2/14	22/18866	0.000117129	0.00354055	0.00170972	PSMA2/PSMA5	2
GO:0009147	pyrimidine nucleoside triphosphate metabolic process	2/14	23/18866	0.000128229	0.00354055	0.00170972	TBPL1/TYMS	2
GO:0035458	cellular response to interferon-beta	2/14	23/18866	0.000128229	0.00354055	0.00170972	IFI16/STAT1	2
GO:0002218	activation of innate immune response	3/14	144/18866	0.000149041	0.0038986	0.00188262	IFI16/PSMA2/PSMA5	3
GO:0002831	regulation of response to biotic stimulus	4/14	409/18866	0.000183377	0.00455691	0.00220052	IFI16/PSMA2/PSMA5/STAT1	4
GO:0006221	pyrimidine nucleotide biosynthetic process	2/14	31/18866	0.00023488	0.00509079	0.00245833	TBPL1/TYMS	2
GO:0009394	2'-deoxyribonucleotide metabolic process	2/14	31/18866	0.00023488	0.00509079	0.00245833	TBPL1/TYMS	2
GO:0035456	response to interferon-beta	2/14	32/18866	0.000250433	0.00509079	0.00245833	IFI16/STAT1	2
GO:0002244	hematopoietic progenitor cell differentiation	3/14	172/18866	0.000251746	0.00509079	0.00245833	EIF2AK2/PSMA2/PSMA5	3
GO:0033209	tumor necrosis factor-mediated signaling pathway	3/14	173/18866	0.000256076	0.00509079	0.00245833	PSMA2/PSMA5/STAT1	3
GO:0019692	deoxyribose phosphate metabolic process	2/14	33/18866	0.000266477	0.0050938	0.00245978	TBPL1/TYMS	2
GO:1905330	regulation of morphogenesis of an epithelium	3/14	181/18866	0.000292468	0.0052602	0.00254014	PSMA2/PSMA5/STAT1	3
GO:0009262	deoxyribonucleotide metabolic process	2/14	35/18866	0.000300036	0.0052602	0.00254014	TBPL1/TYMS	2
GO:0038061	NIK/NF-kappaB signaling	3/14	184/18866	0.000306933	0.0052602	0.00254014	EIF2AK2/PSMA2/PSMA5	3
GO:0031667	response to nutrient levels	4/14	473/18866	0.000319769	0.00529751	0.00255815	EIF2AK2/IFI16/STAT1/TYMS	4
GO:0030224	monocyte differentiation	2/14	38/18866	0.000354046	0.00549878	0.00265535	IFI16/PIR	2
GO:1903131	mononuclear cell differentiation	2/14	38/18866	0.000354046	0.00549878	0.00265535	IFI16/PIR	2
GO:1903706	regulation of hemopoiesis	4/14	498/18866	0.000388977	0.00572904	0.00276654	EIF2AK2/PSMA2/PSMA5/STAT1	4
GO:0010389	regulation of G2/M transition of mitotic cell cycle	3/14	200/18866	0.000391926	0.00572904	0.00276654	PSMA2/PSMA5/TOPBP1	3
GO:0072528	pyrimidine-containing compound biosynthetic process	2/14	41/18866	0.000412445	0.00585672	0.00282819	TBPL1/TYMS	2
GO:0045089	positive regulation of innate immune response	3/14	213/18866	0.00047117	0.00650477	0.00314114	IFI16/PSMA2/PSMA5	3
GO:0050792	regulation of viral process	3/14	217/18866	0.000497474	0.00650643	0.00314194	EIF2AK2/IFI16/STAT1	3
GO:1902749	regulation of cell cycle G2/M phase transition	3/14	217/18866	0.000497474	0.00650643	0.00314194	PSMA2/PSMA5/TOPBP1	3
GO:0006220	pyrimidine nucleotide metabolic process	2/14	46/18866	0.000519484	0.00662009	0.00319682	TBPL1/TYMS	2
GO:0043903	regulation of symbiotic process	3/14	231/18866	0.000596934	0.0074169	0.0035816	EIF2AK2/IFI16/STAT1	3
GO:0002833	positive regulation of response to biotic stimulus	3/14	251/18866	0.000759894	0.00888437	0.00429024	IFI16/PSMA2/PSMA5	3
GO:1901991	negative regulation of mitotic cell cycle phase transition	3/14	251/18866	0.000759894	0.00888437	0.00429024	PSMA2/PSMA5/TOPBP1	3
GO:0000086	G2/M transition of mitotic cell cycle	3/14	254/18866	0.000786544	0.00888437	0.00429024	PSMA2/PSMA5/TOPBP1	3
GO:2000027	regulation of animal organ morphogenesis	3/14	254/18866	0.000786544	0.00888437	0.00429024	PSMA2/PSMA5/STAT1	3
GO:0051607	defense response to virus	3/14	258/18866	0.000822998	0.00908955	0.00438932	EIF2AK2/IFI16/STAT1	3
GO:0048863	stem cell differentiation	3/14	264/18866	0.000879677	0.00950433	0.00458962	EIF2AK2/PSMA2/PSMA5	3
GO:0045071	negative regulation of viral genome replication	2/14	61/18866	0.000912686	0.00965117	0.00466052	EIF2AK2/IFI16	2
GO:1901988	negative regulation of cell cycle phase transition	3/14	270/18866	0.000938792	0.00967366	0.00467138	PSMA2/PSMA5/TOPBP1	3
GO:0044839	cell cycle G2/M phase transition	3/14	273/18866	0.000969276	0.00967366	0.00467138	PSMA2/PSMA5/TOPBP1	3
GO:0006521	regulation of cellular amino acid metabolic process	2/14	63/18866	0.000973205	0.00967366	0.00467138	PSMA2/PSMA5	2
GO:0071356	cellular response to tumor necrosis factor	3/14	297/18866	0.00123606	0.0120456	0.00581677	PSMA2/PSMA5/STAT1	3
GO:0032481	positive regulation of type I interferon production	2/14	74/18866	0.00133968	0.0128043	0.00618315	IFI16/STAT1	2
GO:0002479	antigen processing and presentation of exogenous peptide antigen via MHC class I, TAP-dependent	2/14	75/18866	0.0013758	0.0129014	0.00623005	PSMA2/PSMA5	2
GO:0061418	regulation of transcription from RNA polymerase II promoter in response to hypoxia	2/14	77/18866	0.00144944	0.0133402	0.00644195	PSMA2/PSMA5	2
GO:0034612	response to tumor necrosis factor	3/14	320/18866	0.00153163	0.0138403	0.00668346	PSMA2/PSMA5/STAT1	3
GO:0042590	antigen processing and presentation of exogenous peptide antigen via MHC class I	2/14	80/18866	0.00156336	0.0138749	0.00670013	PSMA2/PSMA5	2
GO:0033238	regulation of cellular amine metabolic process	2/14	81/18866	0.00160226	0.0139706	0.00674638	PSMA2/PSMA5	2
GO:0009142	nucleoside triphosphate biosynthetic process	2/14	82/18866	0.00164163	0.014067	0.00679293	TBPL1/TYMS	2
GO:0031145	anaphase-promoting complex-dependent catabolic process	2/14	83/18866	0.00168145	0.0141641	0.00683978	PSMA2/PSMA5	2
GO:0072527	pyrimidine-containing compound metabolic process	2/14	85/18866	0.00176247	0.0145991	0.00704987	TBPL1/TYMS	2
GO:1903901	negative regulation of viral life cycle	2/14	86/18866	0.00180367	0.0146955	0.0070964	EIF2AK2/IFI16	2
GO:0045930	negative regulation of mitotic cell cycle	3/14	341/18866	0.00183743	0.0147291	0.00711265	PSMA2/PSMA5/TOPBP1	3
GO:0031146	SCF-dependent proteasomal ubiquitin-dependent protein catabolic process	2/14	93/18866	0.00210485	0.016526	0.00798034	PSMA2/PSMA5	2
GO:0010948	negative regulation of cell cycle process	3/14	359/18866	0.00212809	0.016526	0.00798034	PSMA2/PSMA5/TOPBP1	3
GO:0002474	antigen processing and presentation of peptide antigen via MHC class I	2/14	99/18866	0.00238072	0.0182034	0.00879036	PSMA2/PSMA5	2
GO:0045069	regulation of viral genome replication	2/14	100/18866	0.00242828	0.0182857	0.0088301	EIF2AK2/IFI16	2
GO:0070498	interleukin-1-mediated signaling pathway	2/14	103/18866	0.00257365	0.0189767	0.0091638	PSMA2/PSMA5	2
GO:0031349	positive regulation of defense response	3/14	385/18866	0.00259641	0.0189767	0.0091638	IFI16/PSMA2/PSMA5	3
GO:0060071	Wnt signaling pathway, planar cell polarity pathway	2/14	108/18866	0.00282487	0.0202147	0.00976162	PSMA2/PSMA5	2
GO:0043618	regulation of transcription from RNA polymerase II promoter in response to stress	2/14	109/18866	0.00287646	0.0202147	0.00976162	PSMA2/PSMA5	2
GO:0009141	nucleoside triphosphate metabolic process	2/14	110/18866	0.00292848	0.0202147	0.00976162	TBPL1/TYMS	2
GO:0090175	regulation of establishment of planar polarity	2/14	110/18866	0.00292848	0.0202147	0.00976162	PSMA2/PSMA5	2
GO:0002223	stimulatory C-type lectin receptor signaling pathway	2/14	113/18866	0.00308723	0.0210185	0.0101498	PSMA2/PSMA5	2
GO:0043620	regulation of DNA-templated transcription in response to stress	2/14	115/18866	0.00319526	0.0214601	0.010363	PSMA2/PSMA5	2
GO:0002220	innate immune response activating cell surface receptor signaling pathway	2/14	116/18866	0.00324994	0.0215363	0.0103998	PSMA2/PSMA5	2
GO:0002758	innate immune response-activating signal transduction	2/14	117/18866	0.00330507	0.0216134	0.010437	PSMA2/PSMA5	2
GO:0030099	myeloid cell differentiation	3/14	431/18866	0.00357276	0.0230605	0.0111359	IFI16/PIR/STAT1	3
GO:0001736	establishment of planar polarity	2/14	124/18866	0.00370319	0.0232973	0.0112502	PSMA2/PSMA5	2
GO:0007164	establishment of tissue polarity	2/14	124/18866	0.00370319	0.0232973	0.0112502	PSMA2/PSMA5	2
GO:0032479	regulation of type I interferon production	2/14	125/18866	0.00376181	0.0233702	0.0112854	IFI16/STAT1	2
GO:0019079	viral genome replication	2/14	127/18866	0.00388035	0.0235187	0.0113571	EIF2AK2/IFI16	2
GO:0032606	type I interferon production	2/14	127/18866	0.00388035	0.0235187	0.0113571	IFI16/STAT1	2
GO:0001819	positive regulation of cytokine production	3/14	447/18866	0.00395865	0.0235695	0.0113817	EIF2AK2/IFI16/STAT1	3
GO:1901990	regulation of mitotic cell cycle phase transition	3/14	448/18866	0.00398359	0.0235695	0.0113817	PSMA2/PSMA5/TOPBP1	3
GO:0044106	cellular amine metabolic process	2/14	131/18866	0.00412265	0.0241054	0.0116404	PSMA2/PSMA5	2
GO:0046683	response to organophosphorus	2/14	134/18866	0.0043089	0.0249014	0.0120248	STAT1/TYMS	2
GO:0009308	amine metabolic process	2/14	140/18866	0.00469299	0.0268094	0.0129462	PSMA2/PSMA5	2
GO:0010212	response to ionizing radiation	2/14	144/18866	0.00495758	0.027748	0.0133994	IFI16/TOPBP1	2
GO:1901987	regulation of cell cycle phase transition	3/14	486/18866	0.005004	0.027748	0.0133994	PSMA2/PSMA5/TOPBP1	3
GO:0001738	morphogenesis of a polarized epithelium	2/14	145/18866	0.00502479	0.027748	0.0133994	PSMA2/PSMA5	2
GO:0090263	positive regulation of canonical Wnt signaling pathway	2/14	150/18866	0.00536717	0.029313	0.0141552	PSMA2/PSMA5	2
GO:0035567	non-canonical Wnt signaling pathway	2/14	151/18866	0.00543692	0.0293712	0.0141833	PSMA2/PSMA5	2
GO:1903900	regulation of viral life cycle	2/14	157/18866	0.00586416	0.0313386	0.0151333	EIF2AK2/IFI16	2
GO:0009267	cellular response to starvation	2/14	163/18866	0.0063064	0.0333434	0.0161014	EIF2AK2/IFI16	2
GO:0038095	Fc-epsilon receptor signaling pathway	2/14	169/18866	0.0067635	0.0353838	0.0170867	PSMA2/PSMA5	2
GO:0007584	response to nutrient	2/14	171/18866	0.00691916	0.0358211	0.0172979	STAT1/TYMS	2
GO:0002478	antigen processing and presentation of exogenous peptide antigen	2/14	177/18866	0.00739591	0.0360461	0.0174066	PSMA2/PSMA5	2
GO:0010998	regulation of translational initiation by eIF2 alpha phosphorylation	1/14	10/18866	0.00739778	0.0360461	0.0174066	EIF2AK2	1
GO:0033314	mitotic DNA replication checkpoint	1/14	10/18866	0.00739778	0.0360461	0.0174066	TOPBP1	1
GO:0035999	tetrahydrofolate interconversion	1/14	10/18866	0.00739778	0.0360461	0.0174066	TYMS	1
GO:0071104	response to interleukin-9	1/14	10/18866	0.00739778	0.0360461	0.0174066	STAT1	1
GO:0072203	cell proliferation involved in metanephros development	1/14	10/18866	0.00739778	0.0360461	0.0174066	STAT1	1
GO:0030177	positive regulation of Wnt signaling pathway	2/14	183/18866	0.00788725	0.0367706	0.0177564	PSMA2/PSMA5	2
GO:0071347	cellular response to interleukin-1	2/14	183/18866	0.00788725	0.0367706	0.0177564	PSMA2/PSMA5	2
GO:0090090	negative regulation of canonical Wnt signaling pathway	2/14	184/18866	0.00797055	0.0367706	0.0177564	PSMA2/PSMA5	2
GO:0019884	antigen processing and presentation of exogenous antigen	2/14	185/18866	0.00805425	0.0367706	0.0177564	PSMA2/PSMA5	2
GO:0070106	interleukin-27-mediated signaling pathway	1/14	11/18866	0.00813476	0.0367706	0.0177564	STAT1	1
GO:0070757	interleukin-35-mediated signaling pathway	1/14	11/18866	0.00813476	0.0367706	0.0177564	STAT1	1
GO:1902033	regulation of hematopoietic stem cell proliferation	1/14	11/18866	0.00813476	0.0367706	0.0177564	EIF2AK2	1
GO:0043488	regulation of mRNA stability	2/14	186/18866	0.00813835	0.0367706	0.0177564	PSMA2/PSMA5	2
GO:0010565	regulation of cellular ketone metabolic process	2/14	189/18866	0.00839306	0.0375797	0.0181472	PSMA2/PSMA5	2
GO:0048002	antigen processing and presentation of peptide antigen	2/14	194/18866	0.00882554	0.0388585	0.0187647	PSMA2/PSMA5	2
GO:0009162	deoxyribonucleoside monophosphate metabolic process	1/14	12/18866	0.00887123	0.0388585	0.0187647	TYMS	1
GO:0043487	regulation of RNA stability	2/14	195/18866	0.00891322	0.0388585	0.0187647	PSMA2/PSMA5	2
GO:0003337	mesenchymal to epithelial transition involved in metanephros morphogenesis	1/14	13/18866	0.00960719	0.0411618	0.0198769	STAT1	1
GO:0072182	regulation of nephron tubule epithelial cell differentiation	1/14	13/18866	0.00960719	0.0411618	0.0198769	STAT1	1
GO:0042594	response to starvation	2/14	206/18866	0.00990373	0.041562	0.0200702	EIF2AK2/IFI16	2
GO:0050852	T cell receptor signaling pathway	2/14	206/18866	0.00990373	0.041562	0.0200702	PSMA2/PSMA5	2
GO:0061013	regulation of mRNA catabolic process	2/14	208/18866	0.0100889	0.041562	0.0200702	PSMA2/PSMA5	2
GO:0071456	cellular response to hypoxia	2/14	208/18866	0.0100889	0.041562	0.0200702	PSMA2/PSMA5	2
GO:0002573	myeloid leukocyte differentiation	2/14	210/18866	0.0102756	0.041562	0.0200702	IFI16/PIR	2
GO:0035589	G protein-coupled purinergic nucleotide receptor signaling pathway	1/14	14/18866	0.0103426	0.041562	0.0200702	P2RY14	1
GO:0043558	regulation of translational initiation in response to stress	1/14	14/18866	0.0103426	0.041562	0.0200702	EIF2AK2	1
GO:0070555	response to interleukin-1	2/14	211/18866	0.0103696	0.041562	0.0200702	PSMA2/PSMA5	2
GO:0036294	cellular response to decreased oxygen levels	2/14	218/18866	0.011038	0.041925	0.0202455	PSMA2/PSMA5	2
GO:0009130	pyrimidine nucleoside monophosphate biosynthetic process	1/14	15/18866	0.0110776	0.041925	0.0202455	TYMS	1
GO:0033689	negative regulation of osteoblast proliferation	1/14	15/18866	0.0110776	0.041925	0.0202455	EIF2AK2	1
GO:0072075	metanephric mesenchyme development	1/14	15/18866	0.0110776	0.041925	0.0202455	STAT1	1
GO:0072160	nephron tubule epithelial cell differentiation	1/14	15/18866	0.0110776	0.041925	0.0202455	STAT1	1
GO:0097202	activation of cysteine-type endopeptidase activity	1/14	15/18866	0.0110776	0.041925	0.0202455	IFI16	1
GO:1900225	regulation of NLRP3 inflammasome complex assembly	1/14	15/18866	0.0110776	0.041925	0.0202455	EIF2AK2	1
GO:0030178	negative regulation of Wnt signaling pathway	2/14	219/18866	0.011135	0.041925	0.0202455	PSMA2/PSMA5	2
GO:0017148	negative regulation of translation	2/14	220/18866	0.0112324	0.0419327	0.0202492	EIF2AK2/TYMS	2
GO:0031669	cellular response to nutrient levels	2/14	221/18866	0.0113302	0.0419327	0.0202492	EIF2AK2/IFI16	2
GO:0002070	epithelial cell maturation	1/14	16/18866	0.011812	0.0419327	0.0202492	TYMS	1
GO:0006206	pyrimidine nucleobase metabolic process	1/14	16/18866	0.011812	0.0419327	0.0202492	TYMS	1
GO:0009129	pyrimidine nucleoside monophosphate metabolic process	1/14	16/18866	0.011812	0.0419327	0.0202492	TYMS	1
GO:0051770	positive regulation of nitric-oxide synthase biosynthetic process	1/14	16/18866	0.011812	0.0419327	0.0202492	STAT1	1
GO:0060576	intestinal epithelial cell development	1/14	16/18866	0.011812	0.0419327	0.0202492	TYMS	1
GO:0072283	metanephric renal vesicle morphogenesis	1/14	16/18866	0.011812	0.0419327	0.0202492	STAT1	1
GO:0019882	antigen processing and presentation	2/14	232/18866	0.0124309	0.0430024	0.0207657	PSMA2/PSMA5	2
GO:0000076	DNA replication checkpoint	1/14	17/18866	0.012546	0.0430024	0.0207657	TOPBP1	1
GO:0044546	NLRP3 inflammasome complex assembly	1/14	17/18866	0.012546	0.0430024	0.0207657	EIF2AK2	1
GO:0090185	negative regulation of kidney development	1/14	17/18866	0.012546	0.0430024	0.0207657	STAT1	1
GO:1905331	negative regulation of morphogenesis of an epithelium	1/14	17/18866	0.012546	0.0430024	0.0207657	STAT1	1
GO:0071453	cellular response to oxygen levels	2/14	235/18866	0.012739	0.043365	0.0209409	PSMA2/PSMA5	2
GO:0034249	negative regulation of cellular amide metabolic process	2/14	238/18866	0.0130505	0.0441231	0.0213069	EIF2AK2/TYMS	2
GO:0001675	acrosome assembly	1/14	18/18866	0.0132794	0.0442837	0.0213845	TBPL1	1
GO:0007221	positive regulation of transcription of Notch receptor target	1/14	18/18866	0.0132794	0.0442837	0.0213845	STAT1	1
GO:0038093	Fc receptor signaling pathway	2/14	241/18866	0.0133653	0.0442837	0.0213845	PSMA2/PSMA5	2
GO:0033189	response to vitamin A	1/14	19/18866	0.0140123	0.0449298	0.0216965	TYMS	1
GO:0046653	tetrahydrofolate metabolic process	1/14	19/18866	0.0140123	0.0449298	0.0216965	TYMS	1
GO:0072074	kidney mesenchyme development	1/14	19/18866	0.0140123	0.0449298	0.0216965	STAT1	1
GO:0072077	renal vesicle morphogenesis	1/14	19/18866	0.0140123	0.0449298	0.0216965	STAT1	1
GO:2000696	regulation of epithelial cell differentiation involved in kidney development	1/14	19/18866	0.0140123	0.0449298	0.0216965	STAT1	1
GO:0031668	cellular response to extracellular stimulus	2/14	253/18866	0.0146578	0.0449578	0.02171	EIF2AK2/IFI16	2
GO:0032727	positive regulation of interferon-alpha production	1/14	20/18866	0.0147447	0.0449578	0.02171	STAT1	1
GO:0043555	regulation of translation in response to stress	1/14	20/18866	0.0147447	0.0449578	0.02171	EIF2AK2	1
GO:0051767	nitric-oxide synthase biosynthetic process	1/14	20/18866	0.0147447	0.0449578	0.02171	STAT1	1
GO:0051769	regulation of nitric-oxide synthase biosynthetic process	1/14	20/18866	0.0147447	0.0449578	0.02171	STAT1	1
GO:0060231	mesenchymal to epithelial transition	1/14	20/18866	0.0147447	0.0449578	0.02171	STAT1	1
GO:0072087	renal vesicle development	1/14	20/18866	0.0147447	0.0449578	0.02171	STAT1	1
GO:0072234	metanephric nephron tubule development	1/14	20/18866	0.0147447	0.0449578	0.02171	STAT1	1
GO:0042180	cellular ketone metabolic process	2/14	260/18866	0.0154361	0.0463367	0.0223759	PSMA2/PSMA5	2
GO:0035455	response to interferon-alpha	1/14	21/18866	0.0154766	0.0463367	0.0223759	EIF2AK2	1
GO:0072111	cell proliferation involved in kidney development	1/14	21/18866	0.0154766	0.0463367	0.0223759	STAT1	1
GO:0009165	nucleotide biosynthetic process	2/14	266/18866	0.0161172	0.0479656	0.0231625	TBPL1/TYMS	2
GO:0072331	signal transduction by p53 class mediator	2/14	267/18866	0.016232	0.0480196	0.0231886	IFI16/TOPBP1	2
GO:1901293	nucleoside phosphate biosynthetic process	2/14	269/18866	0.0164626	0.0484138	0.0233789	TBPL1/TYMS	2
GO:0007289	spermatid nucleus differentiation	1/14	23/18866	0.0169389	0.0486627	0.0234991	TBPL1	1
GO:0072170	metanephric tubule development	1/14	23/18866	0.0169389	0.0486627	0.0234991	STAT1	1
GO:0072215	regulation of metanephros development	1/14	23/18866	0.0169389	0.0486627	0.0234991	STAT1	1
GO:0072243	metanephric nephron epithelium development	1/14	23/18866	0.0169389	0.0486627	0.0234991	STAT1	1
GO:0007095	mitotic G2 DNA damage checkpoint	1/14	24/18866	0.0176693	0.0504693	0.0243715	TOPBP1	1
GO:0016579	protein deubiquitination	2/14	283/18866	0.0181167	0.0508023	0.0245323	PSMA2/PSMA5	2
GO:0002053	positive regulation of mesenchymal cell proliferation	1/14	25/18866	0.0183992	0.0508023	0.0245323	STAT1	1
GO:0032647	regulation of interferon-alpha production	1/14	25/18866	0.0183992	0.0508023	0.0245323	STAT1	1
GO:0060330	regulation of response to interferon-gamma	1/14	25/18866	0.0183992	0.0508023	0.0245323	STAT1	1
GO:0060334	regulation of interferon-gamma-mediated signaling pathway	1/14	25/18866	0.0183992	0.0508023	0.0245323	STAT1	1
GO:0060575	intestinal epithelial cell differentiation	1/14	25/18866	0.0183992	0.0508023	0.0245323	TYMS	1
GO:0071425	hematopoietic stem cell proliferation	1/14	26/18866	0.0191286	0.0519504	0.0250867	EIF2AK2	1
GO:0072202	cell differentiation involved in metanephros development	1/14	26/18866	0.0191286	0.0519504	0.0250867	STAT1	1
GO:0072273	metanephric nephron morphogenesis	1/14	26/18866	0.0191286	0.0519504	0.0250867	STAT1	1
GO:0060828	regulation of canonical Wnt signaling pathway	2/14	295/18866	0.019589	0.0524956	0.02535	PSMA2/PSMA5	2
GO:0007026	negative regulation of microtubule depolymerization	1/14	27/18866	0.0198575	0.0524956	0.02535	CKAP2	1
GO:0015949	nucleobase-containing small molecule interconversion	1/14	27/18866	0.0198575	0.0524956	0.02535	TYMS	1
GO:0032607	interferon-alpha production	1/14	27/18866	0.0198575	0.0524956	0.02535	STAT1	1
GO:0072207	metanephric epithelium development	1/14	27/18866	0.0198575	0.0524956	0.02535	STAT1	1
GO:0070646	protein modification by small protein removal	2/14	300/18866	0.020217	0.0531633	0.0256724	PSMA2/PSMA5	2
GO:0006760	folic acid-containing compound metabolic process	1/14	28/18866	0.0205859	0.0538483	0.0260032	TYMS	1
GO:0002230	positive regulation of defense response to virus by host	1/14	29/18866	0.0213138	0.0548857	0.0265042	STAT1	1
GO:0019048	modulation by virus of host process	1/14	29/18866	0.0213138	0.0548857	0.0265042	EIF2AK2	1
GO:0050690	regulation of defense response to virus by virus	1/14	29/18866	0.0213138	0.0548857	0.0265042	EIF2AK2	1
GO:0033688	regulation of osteoblast proliferation	1/14	30/18866	0.0220411	0.0564662	0.0272674	EIF2AK2	1
GO:0031114	regulation of microtubule depolymerization	1/14	31/18866	0.022768	0.0580293	0.0280222	CKAP2	1
GO:0050851	antigen receptor-mediated signaling pathway	2/14	325/18866	0.0234839	0.0589733	0.028478	PSMA2/PSMA5	2
GO:0044818	mitotic G2/M transition checkpoint	1/14	32/18866	0.0234944	0.0589733	0.028478	TOPBP1	1
GO:0097421	liver regeneration	1/14	32/18866	0.0234944	0.0589733	0.028478	TYMS	1
GO:0071496	cellular response to external stimulus	2/14	326/18866	0.0236189	0.0589878	0.0284851	EIF2AK2/IFI16	2
GO:0003338	metanephros morphogenesis	1/14	33/18866	0.0242203	0.0595914	0.0287765	STAT1	1
GO:0010464	regulation of mesenchymal cell proliferation	1/14	33/18866	0.0242203	0.0595914	0.0287765	STAT1	1
GO:0035590	purinergic nucleotide receptor signaling pathway	1/14	33/18866	0.0242203	0.0595914	0.0287765	P2RY14	1
GO:0042558	pteridine-containing compound metabolic process	1/14	34/18866	0.0249456	0.0599265	0.0289383	TYMS	1
GO:0045648	positive regulation of erythrocyte differentiation	1/14	34/18866	0.0249456	0.0599265	0.0289383	STAT1	1
GO:0070102	interleukin-6-mediated signaling pathway	1/14	34/18866	0.0249456	0.0599265	0.0289383	STAT1	1
GO:0060070	canonical Wnt signaling pathway	2/14	339/18866	0.0254034	0.0599265	0.0289383	PSMA2/PSMA5	2
GO:0000209	protein polyubiquitination	2/14	340/18866	0.0255429	0.0599265	0.0289383	PSMA2/PSMA5	2
GO:0006520	cellular amino acid metabolic process	2/14	340/18866	0.0255429	0.0599265	0.0289383	PSMA2/PSMA5	2
GO:0000083	regulation of transcription involved in G1/S transition of mitotic cell cycle	1/14	35/18866	0.0256705	0.0599265	0.0289383	TYMS	1
GO:0009112	nucleobase metabolic process	1/14	35/18866	0.0256705	0.0599265	0.0289383	TYMS	1
GO:0033687	osteoblast proliferation	1/14	35/18866	0.0256705	0.0599265	0.0289383	EIF2AK2	1
GO:0110111	negative regulation of animal organ morphogenesis	1/14	35/18866	0.0256705	0.0599265	0.0289383	STAT1	1
GO:0019058	viral life cycle	2/14	341/18866	0.0256828	0.0599265	0.0289383	EIF2AK2/IFI16	2
GO:1903311	regulation of mRNA metabolic process	2/14	344/18866	0.0261043	0.0606253	0.0292758	PSMA2/PSMA5	2
GO:0031572	G2 DNA damage checkpoint	1/14	36/18866	0.0263949	0.0610151	0.029464	TOPBP1	1
GO:0033363	secretory granule organization	1/14	37/18866	0.0271187	0.0623982	0.0301319	TBPL1	1
GO:0010742	macrophage derived foam cell differentiation	1/14	38/18866	0.0278421	0.0631851	0.0305119	STAT1	1
GO:0044003	modulation by symbiont of host process	1/14	38/18866	0.0278421	0.0631851	0.0305119	EIF2AK2	1
GO:0090077	foam cell differentiation	1/14	38/18866	0.0278421	0.0631851	0.0305119	STAT1	1
GO:0001666	response to hypoxia	2/14	359/18866	0.0282545	0.0638295	0.0308231	PSMA2/PSMA5	2
GO:0006270	DNA replication initiation	1/14	39/18866	0.028565	0.0639495	0.0308811	TOPBP1	1
GO:0031111	negative regulation of microtubule polymerization or depolymerization	1/14	39/18866	0.028565	0.0639495	0.0308811	CKAP2	1
GO:0043687	post-translational protein modification	2/14	363/18866	0.0288398	0.0642753	0.0310384	PSMA2/PSMA5	2
GO:0006730	one-carbon metabolic process	1/14	40/18866	0.0292874	0.0644063	0.0311016	TYMS	1
GO:0050691	regulation of defense response to virus by host	1/14	40/18866	0.0292874	0.0644063	0.0311016	STAT1	1
GO:0072210	metanephric nephron development	1/14	40/18866	0.0292874	0.0644063	0.0311016	STAT1	1
GO:0036293	response to decreased oxygen levels	2/14	371/18866	0.0300253	0.0657382	0.0317448	PSMA2/PSMA5	2
GO:0030111	regulation of Wnt signaling pathway	2/14	375/18866	0.0306254	0.066758	0.0322373	PSMA2/PSMA5	2
GO:0006402	mRNA catabolic process	2/14	376/18866	0.0307762	0.0667938	0.0322545	PSMA2/PSMA5	2
GO:0009124	nucleoside monophosphate biosynthetic process	1/14	44/18866	0.0321719	0.0692182	0.0334253	TYMS	1
GO:0010463	mesenchymal cell proliferation	1/14	44/18866	0.0321719	0.0692182	0.0334253	STAT1	1
GO:0006775	fat-soluble vitamin metabolic process	1/14	45/18866	0.0328917	0.0695625	0.0335916	RBP2	1
GO:0032722	positive regulation of chemokine production	1/14	45/18866	0.0328917	0.0695625	0.0335916	EIF2AK2	1
GO:0034198	cellular response to amino acid starvation	1/14	45/18866	0.0328917	0.0695625	0.0335916	EIF2AK2	1
GO:0042771	intrinsic apoptotic signaling pathway in response to DNA damage by p53 class mediator	1/14	45/18866	0.0328917	0.0695625	0.0335916	IFI16	1
GO:0007019	microtubule depolymerization	1/14	46/18866	0.0336111	0.0704841	0.0340366	CKAP2	1
GO:0032570	response to progesterone	1/14	46/18866	0.0336111	0.0704841	0.0340366	TYMS	1
GO:0070482	response to oxygen levels	2/14	396/18866	0.0338552	0.0706977	0.0341397	PSMA2/PSMA5	2
GO:0042493	response to drug	2/14	397/18866	0.0340123	0.0707285	0.0341546	STAT1/TYMS	2
GO:0035850	epithelial cell differentiation involved in kidney development	1/14	47/18866	0.03433	0.0710917	0.03433	STAT1	1
GO:1990928	response to amino acid starvation	1/14	48/18866	0.0350484	0.0722782	0.034903	EIF2AK2	1
GO:0042149	cellular response to glucose starvation	1/14	49/18866	0.0357663	0.0734539	0.0354707	IFI16	1
GO:0045646	regulation of erythrocyte differentiation	1/14	50/18866	0.0364837	0.0746189	0.0360333	STAT1	1
GO:0006401	RNA catabolic process	2/14	415/18866	0.0368896	0.0751399	0.0362848	PSMA2/PSMA5	2
GO:0071354	cellular response to interleukin-6	1/14	51/18866	0.0372006	0.0754641	0.0364414	STAT1	1
GO:0000186	activation of MAPKK activity	1/14	52/18866	0.037917	0.0766047	0.0369922	EIF2AK2	1
GO:0043161	proteasome-mediated ubiquitin-dependent protein catabolic process	2/14	424/18866	0.0383632	0.0768022	0.0370876	PSMA2/PSMA5	2
GO:0032731	positive regulation of interleukin-1 beta production	1/14	53/18866	0.0386329	0.0768022	0.0370876	IFI16	1
GO:0043124	negative regulation of I-kappaB kinase/NF-kappaB signaling	1/14	53/18866	0.0386329	0.0768022	0.0370876	STAT1	1
GO:0043392	negative regulation of DNA binding	1/14	53/18866	0.0386329	0.0768022	0.0370876	IFI16	1
GO:0000387	spliceosomal snRNP assembly	1/14	54/18866	0.0393483	0.0776036	0.0374746	GEMIN2	1
GO:0030857	negative regulation of epithelial cell differentiation	1/14	54/18866	0.0393483	0.0776036	0.0374746	STAT1	1
GO:0070741	response to interleukin-6	1/14	55/18866	0.0400632	0.0787013	0.0380047	STAT1	1
GO:0090183	regulation of kidney development	1/14	56/18866	0.0407777	0.0797894	0.0385301	STAT1	1
GO:0061005	cell differentiation involved in kidney development	1/14	57/18866	0.0414916	0.080868	0.0390509	STAT1	1
GO:0031638	zymogen activation	1/14	58/18866	0.0422051	0.0816706	0.0394385	IFI16	1
GO:0009314	response to radiation	2/14	447/18866	0.0422321	0.0816706	0.0394385	IFI16/TOPBP1	2
GO:0006417	regulation of translation	2/14	450/18866	0.0427475	0.0823469	0.0397651	EIF2AK2/TYMS	2
GO:0032732	positive regulation of interleukin-1 production	1/14	60/18866	0.0436305	0.0836977	0.0404174	IFI16	1
GO:0062012	regulation of small molecule metabolic process	2/14	456/18866	0.0437855	0.0836977	0.0404174	PSMA2/PSMA5	2
GO:0045824	negative regulation of innate immune response	1/14	62/18866	0.0450539	0.0857923	0.0414289	IFI16	1
GO:0002066	columnar/cuboidal epithelial cell development	1/14	64/18866	0.0464754	0.0881613	0.0425728	TYMS	1
GO:0002429	immune response-activating cell surface receptor signaling pathway	2/14	481/18866	0.0482136	0.0907657	0.0438305	PSMA2/PSMA5	2
GO:0002757	immune response-activating signal transduction	2/14	481/18866	0.0482136	0.0907657	0.0438305	PSMA2/PSMA5	2
GO:0010498	proteasomal protein catabolic process	2/14	483/18866	0.0485748	0.0911008	0.0439923	PSMA2/PSMA5	2
GO:0043312	neutrophil degranulation	2/14	487/18866	0.0493005	0.0914487	0.0441604	PSMA2/PSMA5	2
GO:0032642	regulation of chemokine production	1/14	68/18866	0.0493124	0.0914487	0.0441604	EIF2AK2	1
GO:0071479	cellular response to ionizing radiation	1/14	68/18866	0.0493124	0.0914487	0.0441604	IFI16	1
GO:0002283	neutrophil activation involved in immune response	2/14	490/18866	0.0498474	0.0920973	0.0444735	PSMA2/PSMA5	2
GO:1901880	negative regulation of protein depolymerization	1/14	71/18866	0.051435	0.0946786	0.04572	CKAP2	1
GO:0000281	mitotic cytokinesis	1/14	72/18866	0.0521416	0.0952734	0.0460073	CKAP2	1
GO:0009123	nucleoside monophosphate metabolic process	1/14	72/18866	0.0521416	0.0952734	0.0460073	TYMS	1
GO:0031100	animal organ regeneration	1/14	75/18866	0.0542584	0.0980597	0.0473528	TYMS	1
GO:0032602	chemokine production	1/14	75/18866	0.0542584	0.0980597	0.0473528	EIF2AK2	1
GO:0072088	nephron epithelium morphogenesis	1/14	75/18866	0.0542584	0.0980597	0.0473528	STAT1	1
GO:0072091	regulation of stem cell proliferation	1/14	76/18866	0.054963	0.0989732	0.0477939	EIF2AK2	1
GO:0072028	nephron morphogenesis	1/14	77/18866	0.0556671	0.0998792	0.0482314	STAT1	1
GO:0050688	regulation of defense response to virus	1/14	78/18866	0.0563707	0.100417	0.048491	STAT1	1
GO:0072332	intrinsic apoptotic signaling pathway by p53 class mediator	1/14	78/18866	0.0563707	0.100417	0.048491	IFI16	1
GO:0006446	regulation of translational initiation	1/14	79/18866	0.0570739	0.101306	0.0489205	EIF2AK2	1
GO:1901224	positive regulation of NIK/NF-kappaB signaling	1/14	80/18866	0.0577766	0.102188	0.0493465	EIF2AK2	1
GO:0001937	negative regulation of endothelial cell proliferation	1/14	81/18866	0.0584787	0.102699	0.0495933	STAT1	1
GO:0043242	negative regulation of protein-containing complex disassembly	1/14	81/18866	0.0584787	0.102699	0.0495933	CKAP2	1
GO:0000245	spliceosomal complex assembly	1/14	85/18866	0.0612826	0.106868	0.0516064	GEMIN2	1
GO:0031110	regulation of microtubule polymerization or depolymerization	1/14	85/18866	0.0612826	0.106868	0.0516064	CKAP2	1
GO:1901879	regulation of protein depolymerization	1/14	88/18866	0.0633804	0.11014	0.0531863	CKAP2	1
GO:0001656	metanephros development	1/14	91/18866	0.0654738	0.112597	0.0543727	STAT1	1
GO:0033273	response to vitamin	1/14	91/18866	0.0654738	0.112597	0.0543727	TYMS	1
GO:0060333	interferon-gamma-mediated signaling pathway	1/14	91/18866	0.0654738	0.112597	0.0543727	STAT1	1
GO:0072080	nephron tubule development	1/14	93/18866	0.0668671	0.114203	0.0551481	STAT1	1
GO:2000117	negative regulation of cysteine-type endopeptidase activity	1/14	93/18866	0.0668671	0.114203	0.0551481	IFI16	1
GO:0051591	response to cAMP	1/14	94/18866	0.067563	0.114603	0.0553417	STAT1	1
GO:0060993	kidney morphogenesis	1/14	94/18866	0.067563	0.114603	0.0553417	STAT1	1
GO:0060337	type I interferon signaling pathway	1/14	95/18866	0.0682584	0.114609	0.0553446	STAT1	1
GO:0061326	renal tubule development	1/14	95/18866	0.0682584	0.114609	0.0553446	STAT1	1
GO:0071357	cellular response to type I interferon	1/14	95/18866	0.0682584	0.114609	0.0553446	STAT1	1
GO:0032651	regulation of interleukin-1 beta production	1/14	97/18866	0.0696477	0.116549	0.056281	IFI16	1
GO:0002832	negative regulation of response to biotic stimulus	1/14	98/18866	0.0703417	0.117315	0.056651	IFI16	1
GO:0034340	response to type I interferon	1/14	99/18866	0.0710352	0.117682	0.0568281	STAT1	1
GO:0051817	modulation of process of other organism involved in symbiotic interaction	1/14	99/18866	0.0710352	0.117682	0.0568281	EIF2AK2	1
GO:0061640	cytoskeleton-dependent cytokinesis	1/14	100/18866	0.0717282	0.118435	0.0571919	CKAP2	1
GO:0044773	mitotic DNA damage checkpoint	1/14	101/18866	0.0724207	0.118789	0.0573629	TOPBP1	1
GO:0045639	positive regulation of myeloid cell differentiation	1/14	101/18866	0.0724207	0.118789	0.0573629	STAT1	1
GO:0008630	intrinsic apoptotic signaling pathway in response to DNA damage	1/14	103/18866	0.0738043	0.120265	0.0580755	IFI16	1
GO:0048661	positive regulation of smooth muscle cell proliferation	1/14	103/18866	0.0738043	0.120265	0.0580755	STAT1	1
GO:0032611	interleukin-1 beta production	1/14	106/18866	0.0758761	0.123237	0.0595106	IFI16	1
GO:0001523	retinoid metabolic process	1/14	108/18866	0.0772549	0.124661	0.0601986	RBP2	1
GO:0044774	mitotic DNA integrity checkpoint	1/14	108/18866	0.0772549	0.124661	0.0601986	TOPBP1	1
GO:0072009	nephron epithelium development	1/14	110/18866	0.0786318	0.126472	0.0610732	STAT1	1
GO:0032652	regulation of interleukin-1 production	1/14	111/18866	0.0793195	0.127167	0.0614087	IFI16	1
GO:0010927	cellular component assembly involved in morphogenesis	1/14	112/18866	0.0800068	0.127856	0.0617416	TBPL1	1
GO:0035821	modulation of process of other organism	1/14	113/18866	0.0806936	0.128541	0.062072	EIF2AK2	1
GO:0016101	diterpenoid metabolic process	1/14	114/18866	0.0813799	0.12922	0.0623999	RBP2	1
GO:0051261	protein depolymerization	1/14	115/18866	0.0820657	0.129894	0.0627254	CKAP2	1
GO:0031109	microtubule polymerization or depolymerization	1/14	117/18866	0.0834359	0.131227	0.0633691	CKAP2	1
GO:0043666	regulation of phosphoprotein phosphatase activity	1/14	117/18866	0.0834359	0.131227	0.0633691	EIF2AK2	1
GO:1901222	regulation of NIK/NF-kappaB signaling	1/14	119/18866	0.0848043	0.132958	0.0642051	EIF2AK2	1
GO:0002065	columnar/cuboidal epithelial cell differentiation	1/14	121/18866	0.0861707	0.133834	0.064628	TYMS	1
GO:0030218	erythrocyte differentiation	1/14	121/18866	0.0861707	0.133834	0.064628	STAT1	1
GO:0032612	interleukin-1 production	1/14	121/18866	0.0861707	0.133834	0.064628	IFI16	1
GO:0043244	regulation of protein-containing complex disassembly	1/14	122/18866	0.0868532	0.134056	0.0647353	CKAP2	1
GO:0045471	response to ethanol	1/14	122/18866	0.0868532	0.134056	0.0647353	TYMS	1
GO:0006721	terpenoid metabolic process	1/14	124/18866	0.0882168	0.13532	0.0653458	RBP2	1
GO:0051101	regulation of DNA binding	1/14	124/18866	0.0882168	0.13532	0.0653458	IFI16	1
GO:0030968	endoplasmic reticulum unfolded protein response	1/14	125/18866	0.0888979	0.135945	0.0656477	EIF2AK2	1
GO:0072089	stem cell proliferation	1/14	128/18866	0.0909383	0.138639	0.0669485	EIF2AK2	1
GO:0034101	erythrocyte homeostasis	1/14	129/18866	0.0916175	0.139247	0.0672422	STAT1	1
GO:0006766	vitamin metabolic process	1/14	131/18866	0.0929745	0.140879	0.0680301	RBP2	1
GO:0006997	nucleus organization	1/14	133/18866	0.0943296	0.142498	0.0688119	TBPL1	1
GO:0048565	digestive tract development	1/14	135/18866	0.0956828	0.144104	0.0695875	TYMS	1
GO:0035304	regulation of protein dephosphorylation	1/14	139/18866	0.0983837	0.147724	0.0713356	EIF2AK2	1
GO:0001889	liver development	1/14	141/18866	0.0997313	0.148848	0.0718784	TYMS	1
GO:0007586	digestion	1/14	141/18866	0.0997313	0.148848	0.0718784	PIR	1
GO:0072073	kidney epithelium development	1/14	142/18866	0.100404	0.149404	0.0721469	STAT1	1
GO:0072006	nephron development	1/14	143/18866	0.101077	0.149956	0.0724134	STAT1	1
GO:0006720	isoprenoid metabolic process	1/14	144/18866	0.101749	0.150057	0.0724623	RBP2	1
GO:0061008	hepaticobiliary system development	1/14	144/18866	0.101749	0.150057	0.0724623	TYMS	1
GO:0034620	cellular response to unfolded protein	1/14	146/18866	0.103092	0.151141	0.0729855	EIF2AK2	1
GO:0042542	response to hydrogen peroxide	1/14	146/18866	0.103092	0.151141	0.0729855	STAT1	1
GO:0051384	response to glucocorticoid	1/14	147/18866	0.103763	0.151232	0.0730296	TYMS	1
GO:0055123	digestive system development	1/14	147/18866	0.103763	0.151232	0.0730296	TYMS	1
GO:0014074	response to purine-containing compound	1/14	149/18866	0.105103	0.152453	0.0736193	STAT1	1
GO:1905039	carboxylic acid transmembrane transport	1/14	150/18866	0.105772	0.152453	0.0736193	SLC16A7	1
GO:0000077	DNA damage checkpoint	1/14	151/18866	0.106441	0.152453	0.0736193	TOPBP1	1
GO:0006261	DNA-dependent DNA replication	1/14	151/18866	0.106441	0.152453	0.0736193	TOPBP1	1
GO:1903825	organic acid transmembrane transport	1/14	151/18866	0.106441	0.152453	0.0736193	SLC16A7	1
GO:2001056	positive regulation of cysteine-type endopeptidase activity	1/14	151/18866	0.106441	0.152453	0.0736193	IFI16	1
GO:0002262	myeloid cell homeostasis	1/14	154/18866	0.108445	0.154877	0.0747898	STAT1	1
GO:1902904	negative regulation of supramolecular fiber organization	1/14	156/18866	0.109779	0.156333	0.0754926	CKAP2	1
GO:0050777	negative regulation of immune response	1/14	159/18866	0.111776	0.158269	0.0764279	IFI16	1
GO:0051092	positive regulation of NF-kappaB transcription factor activity	1/14	159/18866	0.111776	0.158269	0.0764279	EIF2AK2	1
GO:0007286	spermatid development	1/14	160/18866	0.112441	0.158758	0.076664	TBPL1	1
GO:0031570	DNA integrity checkpoint	1/14	161/18866	0.113105	0.159244	0.0768984	TOPBP1	1
GO:0051494	negative regulation of cytoskeleton organization	1/14	163/18866	0.114432	0.160657	0.077581	CKAP2	1
GO:0007259	receptor signaling pathway via JAK-STAT	1/14	164/18866	0.115095	0.16068	0.077592	STAT1	1
GO:0031960	response to corticosteroid	1/14	164/18866	0.115095	0.16068	0.077592	TYMS	1
GO:0007093	mitotic cell cycle checkpoint	1/14	166/18866	0.116419	0.161171	0.077829	TOPBP1	1
GO:0035967	cellular response to topologically incorrect protein	1/14	166/18866	0.116419	0.161171	0.077829	EIF2AK2	1
GO:0048515	spermatid differentiation	1/14	166/18866	0.116419	0.161171	0.077829	TBPL1	1
GO:0051100	negative regulation of binding	1/14	169/18866	0.118402	0.163461	0.0789349	IFI16	1
GO:0032874	positive regulation of stress-activated MAPK cascade	1/14	170/18866	0.119062	0.163911	0.0791523	EIF2AK2	1
GO:0030856	regulation of epithelial cell differentiation	1/14	171/18866	0.119722	0.163911	0.0791523	STAT1	1
GO:0051170	import into nucleus	1/14	171/18866	0.119722	0.163911	0.0791523	GEMIN2	1
GO:0000910	cytokinesis	1/14	172/18866	0.120381	0.163911	0.0791523	CKAP2	1
GO:0070304	positive regulation of stress-activated protein kinase signaling cascade	1/14	172/18866	0.120381	0.163911	0.0791523	EIF2AK2	1
GO:0048660	regulation of smooth muscle cell proliferation	1/14	173/18866	0.12104	0.163911	0.0791523	STAT1	1
GO:0015718	monocarboxylic acid transport	1/14	174/18866	0.121698	0.163911	0.0791523	SLC16A7	1
GO:0097696	receptor signaling pathway via STAT	1/14	174/18866	0.121698	0.163911	0.0791523	STAT1	1
GO:0010921	regulation of phosphatase activity	1/14	175/18866	0.122356	0.163911	0.0791523	EIF2AK2	1
GO:0048659	smooth muscle cell proliferation	1/14	175/18866	0.122356	0.163911	0.0791523	STAT1	1
GO:0050680	negative regulation of epithelial cell proliferation	1/14	175/18866	0.122356	0.163911	0.0791523	STAT1	1
GO:0048469	cell maturation	1/14	179/18866	0.124983	0.16698	0.0806342	TYMS	1
GO:1901796	regulation of signal transduction by p53 class mediator	1/14	180/18866	0.125639	0.167406	0.0808398	TOPBP1	1
GO:0010950	positive regulation of endopeptidase activity	1/14	181/18866	0.126294	0.167829	0.081044	IFI16	1
GO:0071346	cellular response to interferon-gamma	1/14	182/18866	0.126948	0.168219	0.0812323	STAT1	1
GO:0001959	regulation of cytokine-mediated signaling pathway	1/14	183/18866	0.127602	0.168219	0.0812323	STAT1	1
GO:0006986	response to unfolded protein	1/14	183/18866	0.127602	0.168219	0.0812323	EIF2AK2	1
GO:0001936	regulation of endothelial cell proliferation	1/14	184/18866	0.128256	0.168633	0.0814325	STAT1	1
GO:0071478	cellular response to radiation	1/14	188/18866	0.130867	0.171611	0.0828706	IFI16	1
GO:0006575	cellular modified amino acid metabolic process	1/14	190/18866	0.132169	0.172409	0.083256	TYMS	1
GO:0070507	regulation of microtubule cytoskeleton organization	1/14	190/18866	0.132169	0.172409	0.083256	CKAP2	1
GO:0006413	translational initiation	1/14	192/18866	0.13347	0.173197	0.0836363	EIF2AK2	1
GO:0016525	negative regulation of angiogenesis	1/14	192/18866	0.13347	0.173197	0.0836363	STAT1	1
GO:2000181	negative regulation of blood vessel morphogenesis	1/14	194/18866	0.134768	0.174427	0.0842303	STAT1	1
GO:0007219	Notch signaling pathway	1/14	195/18866	0.135417	0.17474	0.0843817	STAT1	1
GO:0060759	regulation of response to cytokine stimulus	1/14	196/18866	0.136065	0.17474	0.0843817	STAT1	1
GO:0071897	DNA biosynthetic process	1/14	196/18866	0.136065	0.17474	0.0843817	TYMS	1
GO:0051216	cartilage development	1/14	197/18866	0.136713	0.17512	0.0845649	TYMS	1
GO:0001935	endothelial cell proliferation	1/14	199/18866	0.138008	0.176323	0.0851461	STAT1	1
GO:1901654	response to ketone	1/14	200/18866	0.138654	0.176613	0.0852858	TYMS	1
GO:0010952	positive regulation of peptidase activity	1/14	201/18866	0.1393	0.176613	0.0852858	IFI16	1
GO:0031099	regeneration	1/14	201/18866	0.1393	0.176613	0.0852858	TYMS	1
GO:0034341	response to interferon-gamma	1/14	202/18866	0.139946	0.17698	0.085463	STAT1	1
GO:1903708	positive regulation of hemopoiesis	1/14	204/18866	0.141236	0.178158	0.0860318	STAT1	1
GO:0035966	response to topologically incorrect protein	1/14	205/18866	0.14188	0.178517	0.0862054	EIF2AK2	1
GO:1901343	negative regulation of vasculature development	1/14	207/18866	0.143167	0.179682	0.0867678	STAT1	1
GO:0009612	response to mechanical stimulus	1/14	209/18866	0.144452	0.179932	0.0868886	STAT1	1
GO:0035303	regulation of dephosphorylation	1/14	209/18866	0.144452	0.179932	0.0868886	EIF2AK2	1
GO:0040029	regulation of gene expression, epigenetic	1/14	209/18866	0.144452	0.179932	0.0868886	IFI16	1
GO:0051701	interaction with host	1/14	212/18866	0.146377	0.181873	0.0878261	EIF2AK2	1
GO:0007623	circadian rhythm	1/14	218/18866	0.150214	0.186176	0.0899037	TYMS	1
GO:0000075	cell cycle checkpoint	1/14	219/18866	0.150852	0.186501	0.0900609	TOPBP1	1
GO:0002064	epithelial cell development	1/14	221/18866	0.152127	0.18761	0.0905965	TYMS	1
GO:0016485	protein processing	1/14	223/18866	0.1534	0.188712	0.0911284	IFI16	1
GO:0043624	cellular protein complex disassembly	1/14	224/18866	0.154035	0.189026	0.0912802	CKAP2	1
GO:0032869	cellular response to insulin stimulus	1/14	226/18866	0.155305	0.190115	0.0918062	STAT1	1
GO:0048762	mesenchymal cell differentiation	1/14	229/18866	0.157207	0.191971	0.0927022	STAT1	1
GO:0022618	ribonucleoprotein complex assembly	1/14	233/18866	0.159737	0.194582	0.093963	GEMIN2	1
GO:0097305	response to alcohol	1/14	234/18866	0.160369	0.194688	0.0940143	TYMS	1
GO:0000302	response to reactive oxygen species	1/14	235/18866	0.160999	0.194688	0.0940143	STAT1	1
GO:0071695	anatomical structure maturation	1/14	235/18866	0.160999	0.194688	0.0940143	TYMS	1
GO:0032872	regulation of stress-activated MAPK cascade	1/14	237/18866	0.16226	0.195262	0.0942915	EIF2AK2	1
GO:0046777	protein autophosphorylation	1/14	237/18866	0.16226	0.195262	0.0942915	EIF2AK2	1
GO:2000116	regulation of cysteine-type endopeptidase activity	1/14	239/18866	0.163519	0.195638	0.0944733	IFI16	1
GO:0032886	regulation of microtubule-based process	1/14	240/18866	0.164147	0.195638	0.0944733	CKAP2	1
GO:0070302	regulation of stress-activated protein kinase signaling cascade	1/14	240/18866	0.164147	0.195638	0.0944733	EIF2AK2	1
GO:0071826	ribonucleoprotein complex subunit organization	1/14	240/18866	0.164147	0.195638	0.0944733	GEMIN2	1
GO:0033002	muscle cell proliferation	1/14	244/18866	0.166658	0.198155	0.0956886	STAT1	1
GO:0006352	DNA-templated transcription, initiation	1/14	249/18866	0.169786	0.201393	0.097252	TBPL1	1
GO:0009636	response to toxic substance	1/14	250/18866	0.17041	0.201652	0.0973772	TYMS	1
GO:0043122	regulation of I-kappaB kinase/NF-kappaB signaling	1/14	252/18866	0.171658	0.202646	0.097857	STAT1	1
GO:0048872	homeostasis of number of cells	1/14	256/18866	0.174147	0.205097	0.0990409	STAT1	1
GO:0010951	negative regulation of endopeptidase activity	1/14	258/18866	0.175389	0.206072	0.0995115	IFI16	1
GO:0061448	connective tissue development	1/14	262/18866	0.177868	0.208492	0.10068	TYMS	1
GO:0045637	regulation of myeloid cell differentiation	1/14	263/18866	0.178487	0.208725	0.100793	STAT1	1
GO:0043406	positive regulation of MAP kinase activity	1/14	264/18866	0.179105	0.208956	0.100904	EIF2AK2	1
GO:0015850	organic hydroxy compound transport	1/14	268/18866	0.181574	0.21134	0.102055	SLC16A7	1
GO:0031348	negative regulation of defense response	1/14	269/18866	0.18219	0.211561	0.102162	IFI16	1
GO:0051091	positive regulation of DNA-binding transcription factor activity	1/14	270/18866	0.182805	0.211782	0.102269	EIF2AK2	1
GO:0010466	negative regulation of peptidase activity	1/14	272/18866	0.184035	0.212711	0.102717	IFI16	1
GO:0006260	DNA replication	1/14	273/18866	0.18465	0.212926	0.102821	TOPBP1	1
GO:0007281	germ cell development	1/14	275/18866	0.185877	0.213845	0.103265	TBPL1	1
GO:0001822	kidney development	1/14	283/18866	0.19077	0.218462	0.105495	STAT1	1
GO:0032868	response to insulin	1/14	283/18866	0.19077	0.218462	0.105495	STAT1	1
GO:0007249	I-kappaB kinase/NF-kappaB signaling	1/14	286/18866	0.192598	0.219231	0.105866	STAT1	1
GO:0051403	stress-activated MAPK cascade	1/14	286/18866	0.192598	0.219231	0.105866	EIF2AK2	1
GO:0000082	G1/S transition of mitotic cell cycle	1/14	287/18866	0.193206	0.219231	0.105866	TYMS	1
GO:0021700	developmental maturation	1/14	287/18866	0.193206	0.219231	0.105866	TYMS	1
GO:0060485	mesenchyme development	1/14	290/18866	0.195029	0.220294	0.106379	STAT1	1
GO:0097193	intrinsic apoptotic signaling pathway	1/14	290/18866	0.195029	0.220294	0.106379	IFI16	1
GO:0072001	renal system development	1/14	292/18866	0.196241	0.221161	0.106798	STAT1	1
GO:0051604	protein maturation	1/14	293/18866	0.196847	0.221342	0.106885	IFI16	1
GO:0034976	response to endoplasmic reticulum stress	1/14	294/18866	0.197453	0.221521	0.106972	EIF2AK2	1
GO:0031098	stress-activated protein kinase signaling cascade	1/14	300/18866	0.201076	0.225079	0.10869	EIF2AK2	1
GO:0048511	rhythmic process	1/14	305/18866	0.204084	0.227932	0.110068	TYMS	1
GO:0044843	cell cycle G1/S phase transition	1/14	310/18866	0.207082	0.230761	0.111434	TYMS	1
GO:0098656	anion transmembrane transport	1/14	315/18866	0.210069	0.233566	0.112789	SLC16A7	1
GO:0007568	aging	1/14	319/18866	0.212451	0.235688	0.113813	TYMS	1
GO:0006470	protein dephosphorylation	1/14	323/18866	0.214826	0.237792	0.114829	EIF2AK2	1
GO:0001655	urogenital system development	1/14	330/18866	0.218967	0.239824	0.11581	STAT1	1
GO:0032984	protein-containing complex disassembly	1/14	330/18866	0.218967	0.239824	0.11581	CKAP2	1
GO:0071375	cellular response to peptide hormone stimulus	1/14	330/18866	0.218967	0.239824	0.11581	STAT1	1
GO:0032147	activation of protein kinase activity	1/14	331/18866	0.219557	0.239824	0.11581	EIF2AK2	1
GO:0071214	cellular response to abiotic stimulus	1/14	331/18866	0.219557	0.239824	0.11581	IFI16	1
GO:0104004	cellular response to environmental stimulus	1/14	331/18866	0.219557	0.239824	0.11581	IFI16	1
GO:0016050	vesicle organization	1/14	340/18866	0.224848	0.245064	0.118341	TBPL1	1
GO:0043405	regulation of MAP kinase activity	1/14	342/18866	0.226019	0.245801	0.118697	EIF2AK2	1
GO:0071902	positive regulation of protein serine/threonine kinase activity	1/14	345/18866	0.227772	0.247168	0.119357	EIF2AK2	1
GO:0048545	response to steroid hormone	1/14	346/18866	0.228356	0.247261	0.119402	TYMS	1
GO:0010506	regulation of autophagy	1/14	347/18866	0.228939	0.247354	0.119447	IFI16	1
GO:0046942	carboxylic acid transport	1/14	350/18866	0.230687	0.248701	0.120097	SLC16A7	1
GO:0015849	organic acid transport	1/14	353/18866	0.232431	0.250039	0.120743	SLC16A7	1
GO:0006913	nucleocytoplasmic transport	1/14	354/18866	0.233011	0.250122	0.120783	GEMIN2	1
GO:0051169	nuclear transport	1/14	357/18866	0.23475	0.251446	0.121422	GEMIN2	1
GO:0051098	regulation of binding	1/14	367/18866	0.24052	0.257072	0.124139	IFI16	1
GO:0045861	negative regulation of proteolysis	1/14	369/18866	0.241669	0.257746	0.124465	IFI16	1
GO:0045862	positive regulation of proteolysis	1/14	370/18866	0.242243	0.257805	0.124493	IFI16	1
GO:0032259	methylation	1/14	371/18866	0.242817	0.257863	0.124521	TYMS	1
GO:1902903	regulation of supramolecular fiber organization	1/14	373/18866	0.243963	0.258528	0.124842	CKAP2	1
GO:0018108	peptidyl-tyrosine phosphorylation	1/14	374/18866	0.244535	0.258583	0.124869	EIF2AK2	1
GO:0022412	cellular process involved in reproduction in multicellular organism	1/14	375/18866	0.245107	0.258637	0.124895	TBPL1	1
GO:0018212	peptidyl-tyrosine modification	1/14	377/18866	0.24625	0.259292	0.125212	EIF2AK2	1
GO:0000377	RNA splicing, via transesterification reactions with bulged adenosine as nucleophile	1/14	390/18866	0.253638	0.265945	0.128424	GEMIN2	1
GO:0000398	mRNA splicing, via spliceosome	1/14	390/18866	0.253638	0.265945	0.128424	GEMIN2	1
GO:0000375	RNA splicing, via transesterification reactions	1/14	393/18866	0.255334	0.267159	0.129011	GEMIN2	1
GO:0050678	regulation of epithelial cell proliferation	1/14	395/18866	0.256462	0.267776	0.129308	STAT1	1
GO:1901653	cellular response to peptide	1/14	398/18866	0.258151	0.268975	0.129887	STAT1	1
GO:0045765	regulation of angiogenesis	1/14	403/18866	0.260959	0.271332	0.131026	STAT1	1
GO:0010639	negative regulation of organelle organization	1/14	416/18866	0.268214	0.278293	0.134387	CKAP2	1
GO:0032102	negative regulation of response to external stimulus	1/14	433/18866	0.2776	0.287401	0.138785	IFI16	1
GO:0052548	regulation of endopeptidase activity	1/14	434/18866	0.278149	0.287401	0.138785	IFI16	1
GO:0048732	gland development	1/14	443/18866	0.28307	0.291835	0.140926	TYMS	1
GO:1901342	regulation of vasculature development	1/14	444/18866	0.283615	0.291835	0.140926	STAT1	1
GO:0043434	response to peptide hormone	1/14	447/18866	0.285247	0.292908	0.141445	STAT1	1
GO:0043254	regulation of protein-containing complex assembly	1/14	449/18866	0.286333	0.293417	0.14169	EIF2AK2	1
GO:0050673	epithelial cell proliferation	1/14	453/18866	0.288501	0.29503	0.142469	STAT1	1
GO:0051090	regulation of DNA-binding transcription factor activity	1/14	455/18866	0.289582	0.295528	0.14271	EIF2AK2	1
GO:0006979	response to oxidative stress	1/14	458/18866	0.291202	0.296572	0.143214	STAT1	1
GO:0002683	negative regulation of immune system process	1/14	463/18866	0.293893	0.298701	0.144242	IFI16	1
GO:0052547	regulation of peptidase activity	1/14	466/18866	0.295504	0.299725	0.144736	IFI16	1
GO:0010256	endomembrane system organization	1/14	468/18866	0.296575	0.300199	0.144965	TBPL1	1
GO:0002697	regulation of immune effector process	1/14	470/18866	0.297645	0.30067	0.145193	STAT1	1
GO:0051346	negative regulation of hydrolase activity	1/14	473/18866	0.299248	0.301676	0.145678	IFI16	1
GO:0008544	epidermis development	1/14	477/18866	0.301379	0.303209	0.146419	RBP2	1
GO:0022613	ribonucleoprotein complex biogenesis	1/14	482/18866	0.304035	0.305263	0.147411	GEMIN2	1
GO:0008380	RNA splicing	1/14	487/18866	0.306681	0.307299	0.148394	GEMIN2	1
GO:0016311	dephosphorylation	1/14	492/18866	0.309318	0.309318	0.149369	EIF2AK2	1

## Sheet: Table S8
Table S8. Results of machine learning identification Hub ARDS-ARDEGs
LASSO			RF			XGBoost
geneids	index.min		Feature	vimp		Feature	Gain
CKAP2	0.159252		P2RY14	0.0558425		CKAP2	0.223298
P2RY14	0.035971		PSMA5	0.00979004		P2RY14	0.132067
RBP2	0.0279321		CKAP2	0.0562929		PSMA2	0.112836
TYMS	0.113132		STAT1	0.0261329		TOPBP1	0.0984234
			TYMS	0.0308126		EIF2AK2	0.085898
			RBP2	0.00883334		TYMS	0.0635342
						PIR	0.0631027
						RBP2	0.0615496
						PSMA5	0.0515431
						GEMIN2	0.0386903

## Sheet: Table S9
Table S9. Primer sequences
1	Mouse-GAPDH
	Forward:5′-AGGTCGGTGTGAACGGATTTG-3′
	Reverse:5′-TGTAGACCATGTAGTTGAGGTCA-3′
2	Mouse-CKAP2
	Forward:5′- CCGGCCTTCCGAGAACA-3′
	Reverse:5′- TTTTCCCTTCTTGGACCCGA-3′
3	Mouse-P2RY14
	Forward:5′-AAAACTCTTGGAGCTGGGCA-3′
	Reverse:5′-GTTCTTCAGGGAGGCTACCACTTC-3′
4	Mouse-RBP2
	Forward:5′-GGACCAAAATGGAACCTGGGA-3′
	Reverse:5′-GGTGGCAAAATCAATATCTAGGGC-3′
5	Mouse-TYMS
	Forward:5′-GTGGTTTATCAAGGGATCCACA-3′
	Reverse:5′-TCCTGTCGGGCAGAAAATCC-3′

## Sheet: Table S10
Table S10. Results of inmmune cell infiltration.
sample	Activated B cell	Activated CD4 T cell	Activated CD8 T cell	Activated dendritic cell	CD56bright natural killer cell	CD56dim natural killer cell	Central memory CD4 T cell	Central memory CD8 T cell	Effector memeory CD4 T cell	Effector memeory CD8 T cell	Eosinophil	Gamma delta T cell	Immature B cell	Immature dendritic cell	Macrophage	Mast cell	MDSC	Memory B cell	Monocyte	Natural killer cell	Natural killer T cell	Neutrophil	Plasmacytoid dendritic cell	Regulatory T cell	T follicular helper cell	Type 1 T helper cell	Type 17 T helper cell	Type 2 T helper cell	group
COMET1001.4	-0.0135153	0.31803	0.167899	0.405691	0.184262	0.21894	0.474718	0.310157	0.208074	0.271113	0.31737	0.357125	0.464722	0.374881	0.274884	0.253809	0.625343	0.0859365	0.434948	0.28475	0.166219	0.646516	0.478616	0.382135	0.196255	0.120591	0.0221033	0.0908036	high
COMET1002.2	-0.0472954	0.305056	0.220595	0.444598	0.2022	0.215061	0.53585	0.395148	0.237976	0.352295	0.27647	0.348804	0.432796	0.407342	0.363978	0.317555	0.685566	0.0814207	0.507861	0.307081	0.189107	0.737137	0.529611	0.478677	0.219494	0.166573	0.0940147	0.0490258	low
COMET1043.1	-0.0668811	0.296055	0.247037	0.44294	0.157812	0.233018	0.544554	0.310124	0.193532	0.39	0.257306	0.309963	0.457707	0.459414	0.319101	0.227991	0.679393	-0.00322282	0.486776	0.329205	0.173256	0.67361	0.50589	0.397065	0.221533	0.189722	0.0630542	0.0551687	low
COMET1053.1	-0.078153	0.280205	0.173842	0.423126	0.175218	0.231239	0.543209	0.336791	0.231962	0.308468	0.281218	0.333142	0.42475	0.403828	0.336222	0.285653	0.643455	0.0497485	0.486349	0.303259	0.207393	0.663587	0.528359	0.435259	0.191121	0.149475	0.0962063	0.0523586	high
COMET1059.1	-0.110957	0.249219	0.035426	0.33953	0.0980342	0.228082	0.506426	0.30995	0.226144	0.197591	0.296813	0.172894	0.359948	0.439602	0.305857	0.226629	0.513831	0.00014885	0.470299	0.283506	0.13549	0.755975	0.457997	0.194685	0.0685296	0.153418	0.0302766	0.00954374	low
COMET1072.1	-0.101945	0.155315	0.131068	0.275895	0.148319	0.300281	0.560572	0.337558	0.155071	0.295766	0.183806	0.250679	0.369713	0.377451	0.115535	0.0929763	0.552906	-0.0658971	0.363189	0.315968	0.0643891	0.125032	0.463577	0.322455	0.120322	0.106246	-0.055314	0.018963	low
COMET1077.1	-0.0850666	0.306307	0.15588	0.394178	0.163554	0.242639	0.560031	0.34202	0.201244	0.313557	0.394913	0.29375	0.426543	0.426904	0.333841	0.282601	0.631277	0.0388315	0.497864	0.305164	0.191515	0.682872	0.527594	0.364808	0.196994	0.176913	0.0247679	0.0592666	low
COMET1078.2	0.0178047	0.328585	0.212376	0.428126	0.165903	0.230576	0.503734	0.331239	0.203314	0.381502	0.312524	0.306671	0.453276	0.388203	0.30332	0.226886	0.671661	0.0301173	0.483166	0.308962	0.222207	0.609303	0.51057	0.359172	0.21297	0.1458	0.0816049	0.0649025	high
COMET1089.2	-0.0407917	0.236957	0.216803	0.416138	0.1532	0.238664	0.532	0.298779	0.155842	0.282584	0.316685	0.251564	0.412372	0.442848	0.21838	0.185332	0.580157	-0.00648969	0.439453	0.32237	0.0914229	0.581509	0.499285	0.264688	0.0996472	0.156941	0.0180301	0.00726255	low
COMET1094.4	-0.0957516	0.242802	0.153494	0.446245	0.174624	0.224797	0.57573	0.333973	0.178341	0.326513	0.336948	0.322935	0.427006	0.469609	0.30896	0.287086	0.636042	0.0444243	0.480213	0.32166	0.192848	0.652263	0.51969	0.433962	0.200201	0.152892	-0.00898849	0.0602257	high
COMET1107.5	-0.0297784	0.343293	0.270668	0.446573	0.172303	0.259304	0.54718	0.323073	0.201456	0.354536	0.336241	0.308714	0.433891	0.405204	0.294426	0.2676	0.644974	0.0283745	0.475878	0.308901	0.205279	0.63856	0.511721	0.426489	0.193236	0.166459	0.0203375	0.0906549	low
COMET1114.4	-0.143359	0.246908	0.0614544	0.391617	0.173788	0.258524	0.529474	0.361386	0.136747	0.28397	0.302748	0.263915	0.453033	0.44485	0.20851	0.195387	0.562547	0.0182577	0.404138	0.290679	0.0650529	0.548203	0.50231	0.298846	0.104463	0.121353	0.026362	0.0695846	low
COMET1115.3	-0.0289234	0.25586	0.205393	0.437521	0.128421	0.236285	0.502298	0.346988	0.171712	0.423537	0.329388	0.32203	0.424434	0.393924	0.32631	0.256733	0.68707	0.0445793	0.510838	0.299582	0.230991	0.679767	0.508457	0.420731	0.266651	0.161882	0.0579848	0.071997	low
COMET1122.2	-0.127821	0.192341	0.0373561	0.403986	0.186908	0.235876	0.542664	0.366719	0.136347	0.310425	0.286795	0.32522	0.415225	0.452234	0.336109	0.226899	0.630446	0.0287847	0.475405	0.303427	0.159759	0.630419	0.541962	0.426361	0.222287	0.140699	0.0233725	0.0531949	low
COMET1145.2	-0.00146487	0.27486	0.134856	0.389673	0.161147	0.155325	0.475883	0.257017	0.252101	0.213285	0.337489	0.296165	0.399366	0.333052	0.305523	0.274731	0.571181	0.0651893	0.452188	0.292722	0.151513	0.719829	0.460064	0.285772	0.160103	0.131104	0.0693437	0.0775896	high
MBAL203	-0.0898127	0.319522	0.176926	0.44571	0.179384	0.118587	0.483096	0.269237	0.233946	0.269453	0.423181	0.330091	0.385049	0.422448	0.344329	0.354888	0.627989	0.144691	0.52233	0.282681	0.167692	0.784131	0.472921	0.404235	0.220447	0.158389	0.0573791	0.0513988	high
MBAL213	0.0292816	0.386396	0.236137	0.477022	0.167639	0.177509	0.457933	0.35206	0.276385	0.296942	0.381104	0.335126	0.428922	0.41582	0.39324	0.397474	0.659573	0.123848	0.486242	0.26998	0.143954	0.766029	0.449208	0.405299	0.213014	0.194312	0.0644245	0.125948	high
MBAL227	-0.180705	0.248747	0.0413025	0.475728	0.215031	0.261355	0.559499	0.327747	0.207439	0.300017	0.237191	0.381094	0.360066	0.447746	0.34881	0.302302	0.620713	0.0214255	0.517283	0.261438	0.138416	0.684598	0.534308	0.46785	0.220275	0.179569	0.0998112	0.0182931	low
MBAL229	-0.215869	0.184973	0.123643	0.361663	0.211444	0.20935	0.542802	0.323918	0.193138	0.221346	0.186762	0.321445	0.290584	0.473707	0.267718	0.237481	0.531263	-0.0733043	0.423796	0.235083	-0.00262364	0.635561	0.506764	0.292353	0.0774718	0.127194	0.0282008	0.0106684	low
MBAL234	-0.149349	0.219699	0.0948462	0.4693	0.196828	0.213584	0.521053	0.326129	0.191024	0.260977	0.240427	0.352225	0.360013	0.468028	0.341098	0.27821	0.640672	-0.000115684	0.503607	0.278687	0.174173	0.722113	0.521088	0.411521	0.179774	0.157044	0.0134967	-0.0058822	low
MBAL251	-0.0876875	0.241359	0.11468	0.403143	0.185253	0.110131	0.483966	0.28781	0.194497	0.256499	0.39641	0.323689	0.366821	0.375102	0.398603	0.376601	0.59553	0.14478	0.494125	0.309723	0.0884058	0.725241	0.525247	0.32851	0.152253	0.137845	0.100092	0.0917275	high
MBAL288	0.0844978	0.348391	0.0758863	0.122153	0.130401	0.145912	0.32354	0.329582	0.181107	0.187346	0.156775	0.192582	0.431593	0.275436	0.264462	0.319705	0.388817	0.0315515	0.306229	0.210491	0.0316396	0.438002	0.234024	0.26079	0.126238	0.152149	-0.0801221	0.216909	high
MBAL311	-0.130321	0.269261	0.187285	0.421618	0.216658	0.223221	0.498802	0.31787	0.243054	0.222934	0.177303	0.357643	0.294084	0.460461	0.323146	0.259293	0.593012	0.0521996	0.467651	0.249622	0.095571	0.711395	0.495361	0.224528	0.125669	0.153318	-0.0341194	0.0919592	high
MBAL314	-0.0386055	0.355893	0.194336	0.438279	0.185801	0.255404	0.533141	0.338192	0.234648	0.353951	0.347644	0.308577	0.498668	0.41356	0.330401	0.314079	0.630698	0.052741	0.487412	0.329903	0.214452	0.645536	0.53888	0.450484	0.195788	0.193686	0.150394	0.0960094	high
MBAL315	-0.0488786	0.311502	0.13974	0.437363	0.168087	0.214655	0.515209	0.346734	0.180072	0.334371	0.291211	0.308235	0.457896	0.41051	0.362916	0.283898	0.655067	0.0536935	0.490391	0.29795	0.234199	0.700226	0.510577	0.421136	0.193938	0.169412	0.103378	0.0391793	high
MBAL321	0.0659038	0.280858	0.0506316	-0.0619534	0.120227	0.127709	0.282149	0.231993	0.164262	0.145122	0.259771	0.144019	0.364719	0.190684	0.113012	0.098558	0.207607	-0.10771	0.234834	0.116581	0.0248725	-0.0291755	0.105794	0.133257	0.0396873	0.076079	-0.0733758	0.184474	high
MBAL334	-0.032304	0.296289	0.145149	0.466861	0.166458	0.208743	0.498869	0.375146	0.196778	0.347699	0.29229	0.330779	0.46148	0.421056	0.369991	0.289916	0.657116	0.0423655	0.515222	0.315224	0.235259	0.733592	0.522545	0.420211	0.190513	0.18273	0.0583546	0.048598	low
MBAL337	-0.132198	0.349772	0.253715	0.467546	0.223438	0.18481	0.509729	0.331414	0.181252	0.269489	0.209043	0.355978	0.411442	0.370098	0.333105	0.233695	0.632728	-0.0304258	0.459129	0.261828	0.137093	0.63786	0.469037	0.417761	0.201707	0.194268	0.0522799	0.0512916	high
MBAL409	-0.0725776	0.300539	0.102439	0.435011	0.149926	0.129112	0.462832	0.257563	0.173655	0.172895	0.397116	0.214941	0.424708	0.424237	0.359906	0.316275	0.589896	-0.0227278	0.472817	0.256991	0.187395	0.710857	0.473477	0.267671	0.120207	0.159817	0.0372925	0.0445737	high
MBAL411	-0.019082	0.323767	0.174909	0.462042	0.185992	0.212322	0.536459	0.353169	0.218703	0.344878	0.366569	0.337631	0.457223	0.436866	0.31455	0.268198	0.662686	0.0554088	0.489909	0.309685	0.213991	0.647879	0.524441	0.501219	0.188854	0.181744	0.0863711	0.102418	low
MBAL413	-0.161618	0.239242	0.129773	0.399964	0.206899	0.227828	0.566843	0.344924	0.245578	0.326852	0.148665	0.346951	0.370004	0.515068	0.281556	0.2231	0.598951	-0.0374615	0.444936	0.312687	0.149621	0.542701	0.524829	0.408225	0.160891	0.162424	-0.00738447	0.0971108	low
MBAL414	-0.0548656	0.23263	0.0361646	0.424185	0.247991	0.215731	0.454536	0.302174	0.186749	0.217807	0.227378	0.266355	0.384811	0.382962	0.314939	0.309442	0.627893	0.0193436	0.493236	0.239561	0.190562	0.675933	0.487545	0.320436	0.16209	0.121544	0.0800843	0.00297035	low
MBAL458	-0.0955135	0.263371	0.0930447	0.439551	0.180667	0.256935	0.510795	0.3189	0.181533	0.290555	0.179417	0.323083	0.377197	0.421401	0.329988	0.296374	0.619608	0.0288886	0.496787	0.284851	0.193349	0.690051	0.507675	0.420072	0.199322	0.162477	0.0770132	0.0325463	low
MBAL463	-0.0521506	0.273431	0.0909165	0.429268	0.132854	0.170276	0.487883	0.272181	0.156149	0.224688	0.329152	0.280476	0.421096	0.402246	0.352069	0.289207	0.590756	0.0533495	0.490336	0.275653	0.216795	0.730762	0.496087	0.299212	0.146292	0.179333	0.0887271	0.0590047	high
MBAL473	-0.115413	0.270827	0.164304	0.43393	0.186515	0.190366	0.547476	0.37775	0.179404	0.283108	0.291108	0.364537	0.422586	0.418597	0.323717	0.310431	0.647849	0.0571645	0.527177	0.318518	0.190543	0.707242	0.510891	0.480264	0.227561	0.15736	0.0455711	0.0986201	low
MBAL479	-0.0343037	0.308963	0.147312	0.455112	0.181802	0.184917	0.500154	0.310149	0.185806	0.305334	0.305265	0.34655	0.447761	0.389735	0.35804	0.255764	0.656016	0.123383	0.515791	0.272547	0.182351	0.688474	0.513173	0.409579	0.231826	0.155654	0.0217917	0.0450102	high
MBAL488	-0.0703025	0.0848578	0.032026	0.353968	0.19062	0.345768	0.460755	0.327961	0.0154629	0.267977	0.239993	0.213765	0.258661	0.398162	0.328394	0.252768	0.583933	0.0908047	0.534058	0.252474	0.203726	0.546529	0.497642	0.277848	0.194355	0.129421	0.0753011	0.0688771	high
MBAL503	0.0653969	0.341487	0.246586	0.433659	0.153899	0.284549	0.532144	0.348956	0.174139	0.423289	0.257612	0.325682	0.488327	0.411299	0.302573	0.282962	0.658128	0.0411045	0.47615	0.300818	0.200738	0.572881	0.48405	0.485551	0.224692	0.197801	0.0636953	0.126298	low
MBAL524	-0.00874694	0.303065	0.410317	0.347938	0.17486	0.235557	0.590456	0.363263	0.241178	0.40952	0.166803	0.314294	0.425204	0.482591	0.206216	0.116495	0.679459	0.00771753	0.448624	0.307203	0.11157	0.414649	0.493232	0.410109	0.18697	0.174223	-0.00130281	0.100302	high
MBAL530	-0.0836818	-0.0472885	0.103774	0.325659	0.194287	0.304322	0.42662	0.259263	0.00112202	0.317386	0.277277	0.177759	0.0702633	0.294111	0.279286	0.230655	0.527354	0.103172	0.463352	0.276261	0.14813	0.274387	0.462356	0.135098	0.134402	0.135372	0.0611976	0.0562794	high
MBAL539	-0.140278	0.182032	0.0367674	0.427961	0.159579	0.222399	0.544552	0.319074	0.179082	0.232356	0.331382	0.301378	0.422263	0.43752	0.329313	0.257903	0.580629	0.0159489	0.460694	0.253286	0.162254	0.658665	0.538752	0.358026	0.161646	0.171374	0.0405398	0.0398136	high
MBAL541	-0.0906412	0.301529	0.0494133	0.418641	0.14328	0.237923	0.507064	0.314083	0.153196	0.246058	0.290211	0.268531	0.401047	0.418116	0.344543	0.294828	0.581662	0.0492536	0.472865	0.27168	0.209057	0.724118	0.496808	0.32861	0.136884	0.151522	0.131177	0.0571635	low
MBAL543	-0.0108623	0.211788	0.0765353	0.39853	0.173101	0.158412	0.514632	0.257762	0.137487	0.222152	0.260335	0.269729	0.390582	0.377655	0.336989	0.279428	0.593518	0.0721198	0.505128	0.224686	0.169826	0.761728	0.533057	0.392952	0.196468	0.179805	0.0357517	0.0719284	low
MBAL551	-0.114109	0.132391	0.126086	0.379825	0.179476	0.252438	0.550709	0.365404	0.222136	0.269426	0.141232	0.348718	0.377704	0.456843	0.265282	0.158812	0.58172	-0.0316018	0.415824	0.318783	0.100654	0.464816	0.482768	0.400999	0.161424	0.116143	-0.0227878	0.00782639	low
MBAL575	-0.173185	0.242006	0.0308462	0.413522	0.128126	0.150349	0.469983	0.283142	0.0915885	0.135411	0.21674	0.243112	0.378509	0.421765	0.342067	0.277785	0.564054	0.0229566	0.469779	0.210874	0.136141	0.772658	0.461826	0.264821	0.121113	0.143314	0.011204	0.0181355	low
MBAL657	0.0462722	0.138099	0.126151	0.407163	0.18333	0.298224	0.404982	0.318877	0.0293637	0.39035	0.219605	0.189592	0.283854	0.354325	0.32001	0.320453	0.573537	0.0542356	0.497708	0.234826	0.181341	0.509704	0.479048	0.209628	0.161085	0.148602	0.08071	-0.0139908	high
MBAL211	-0.0490242	0.395384	0.0932408	0.338501	0.223855	0.166067	0.470102	0.368352	0.307683	0.266198	0.170224	0.346612	0.552039	0.311119	0.270877	0.240109	0.536768	0.116827	0.376972	0.296303	0.0651299	0.27066	0.372654	0.379786	0.162383	0.18763	-0.0245528	0.17156	high
